# Supplementary material for: Efficacy and pharmacodynamics of niraparib in BRCA-mutant and wild-type intracranial triple-negative breast cancer murine models
Source: PubMed Central journal article supplement (PMC7212882; doi:10.1093/noajnl/vdz005), 2019-06-04

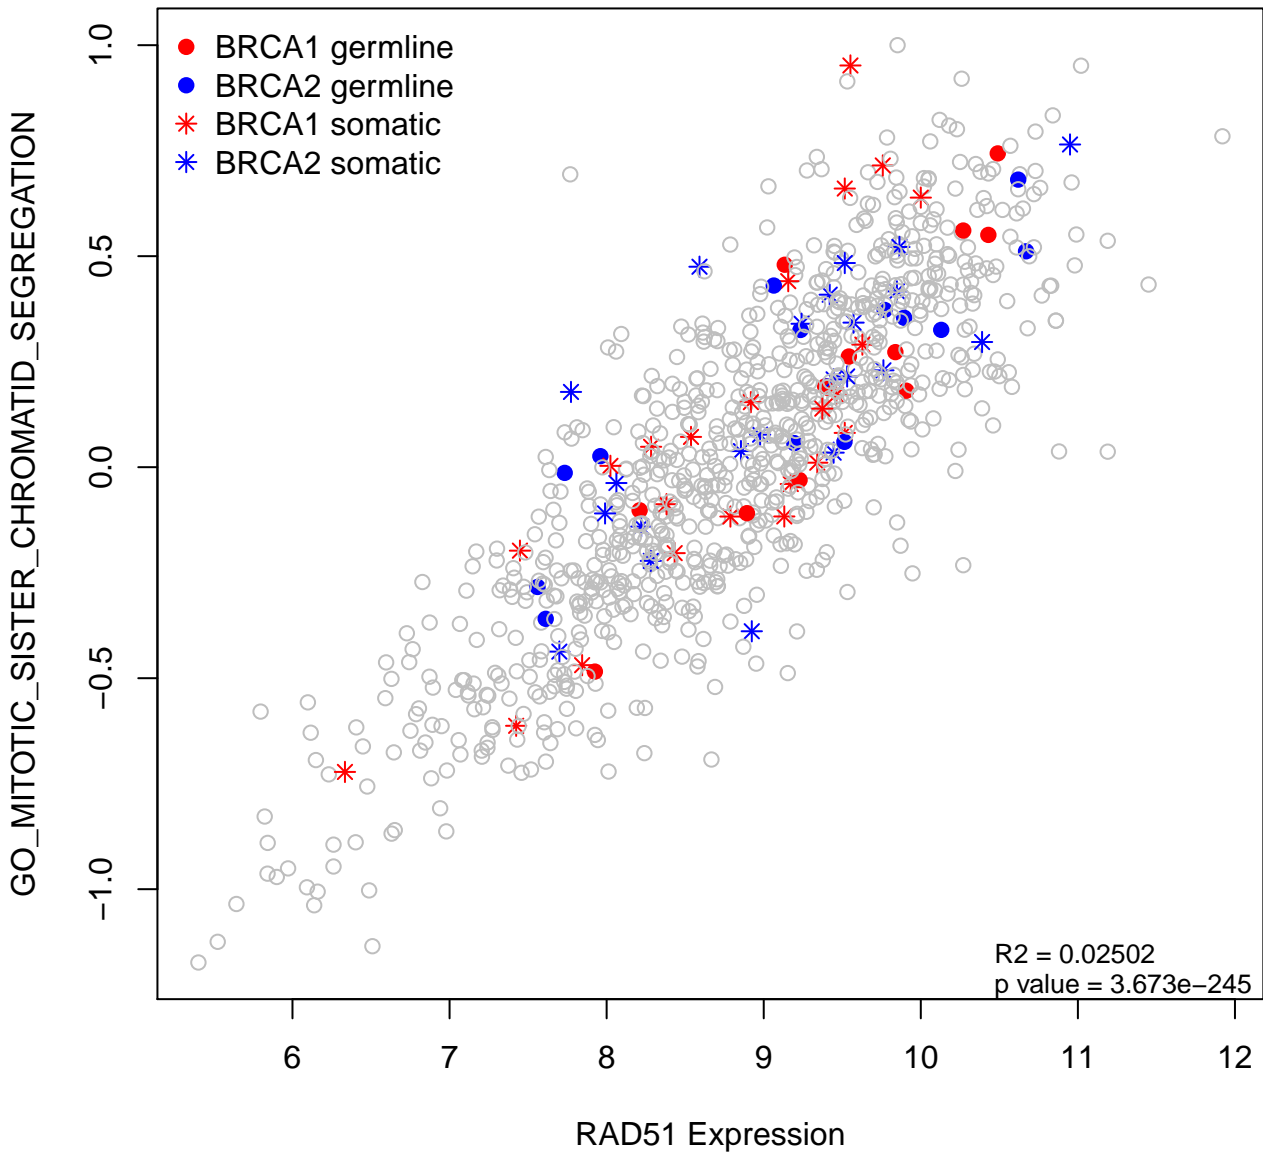

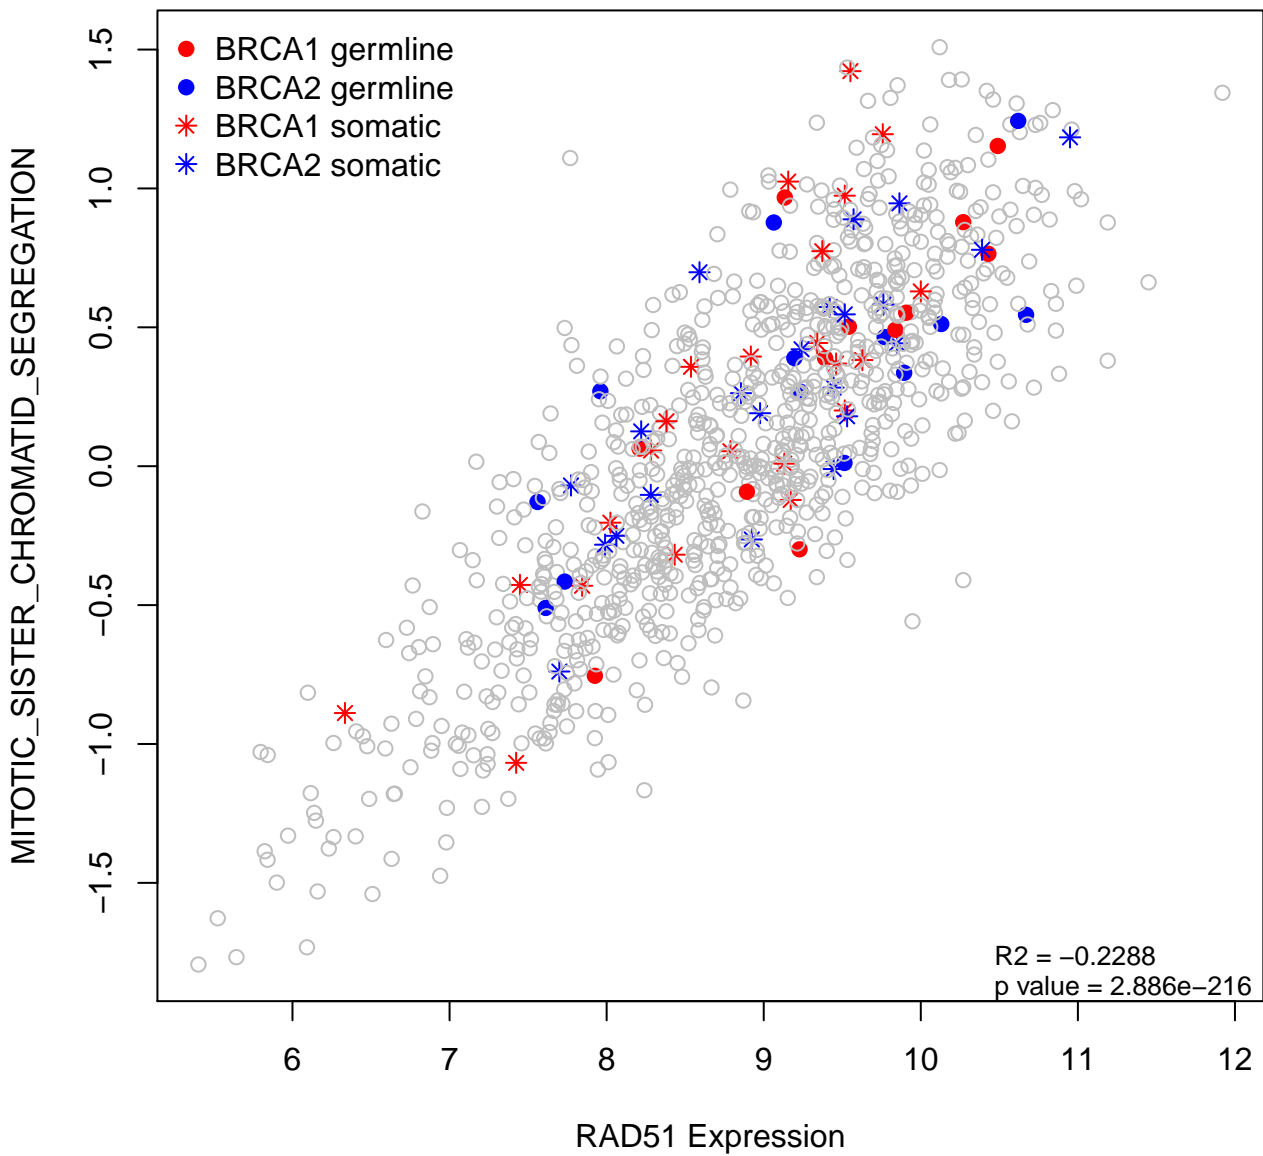

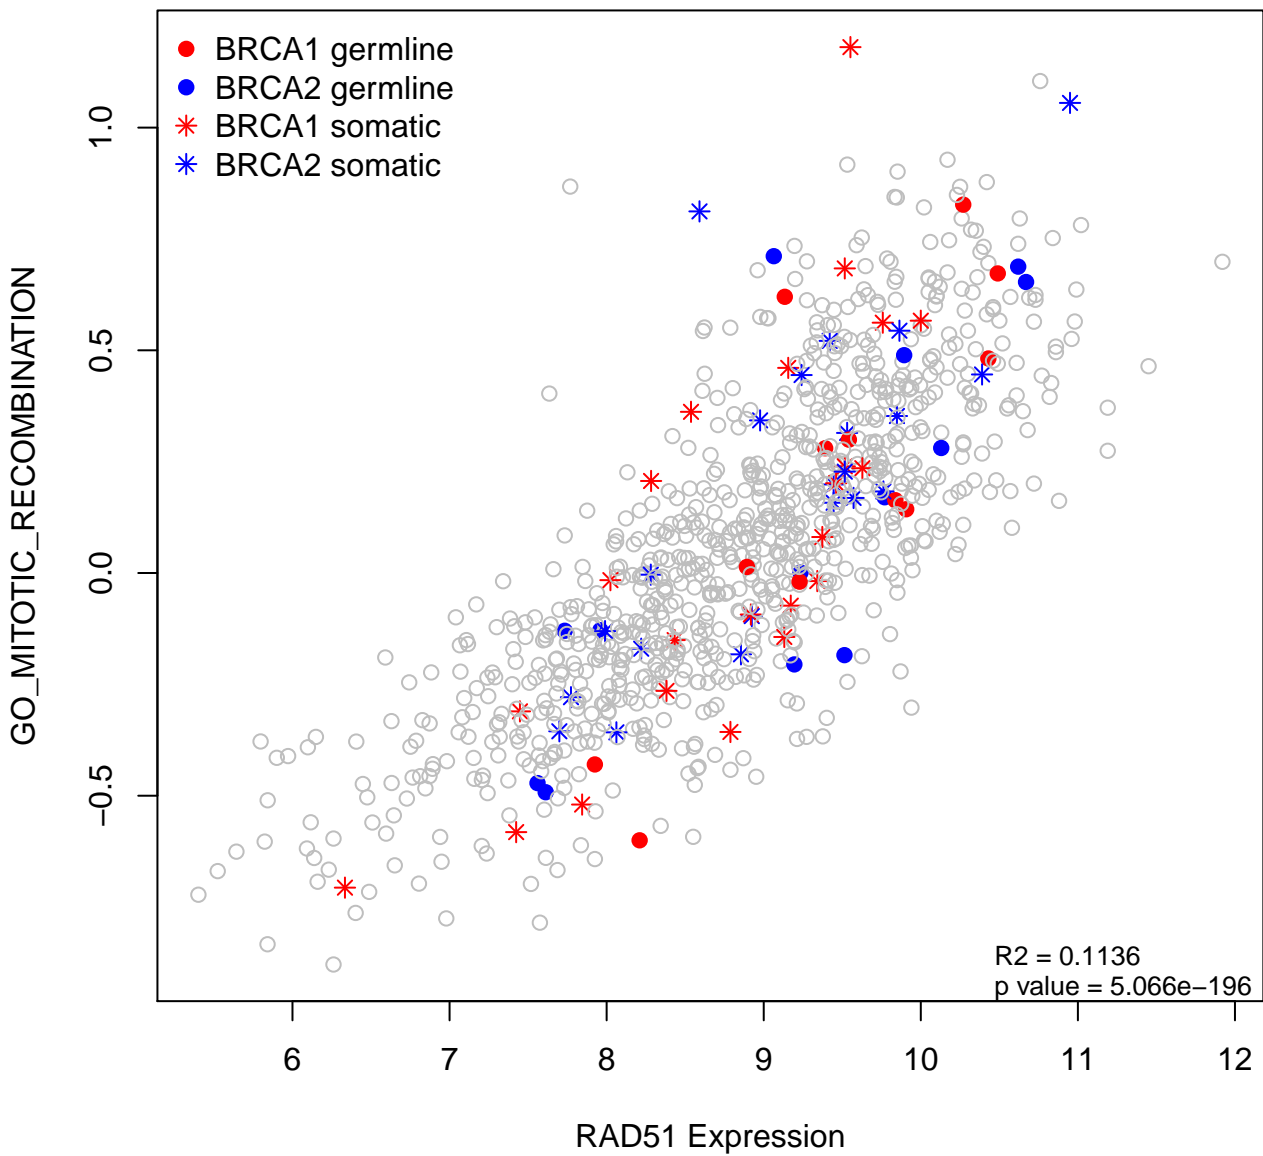

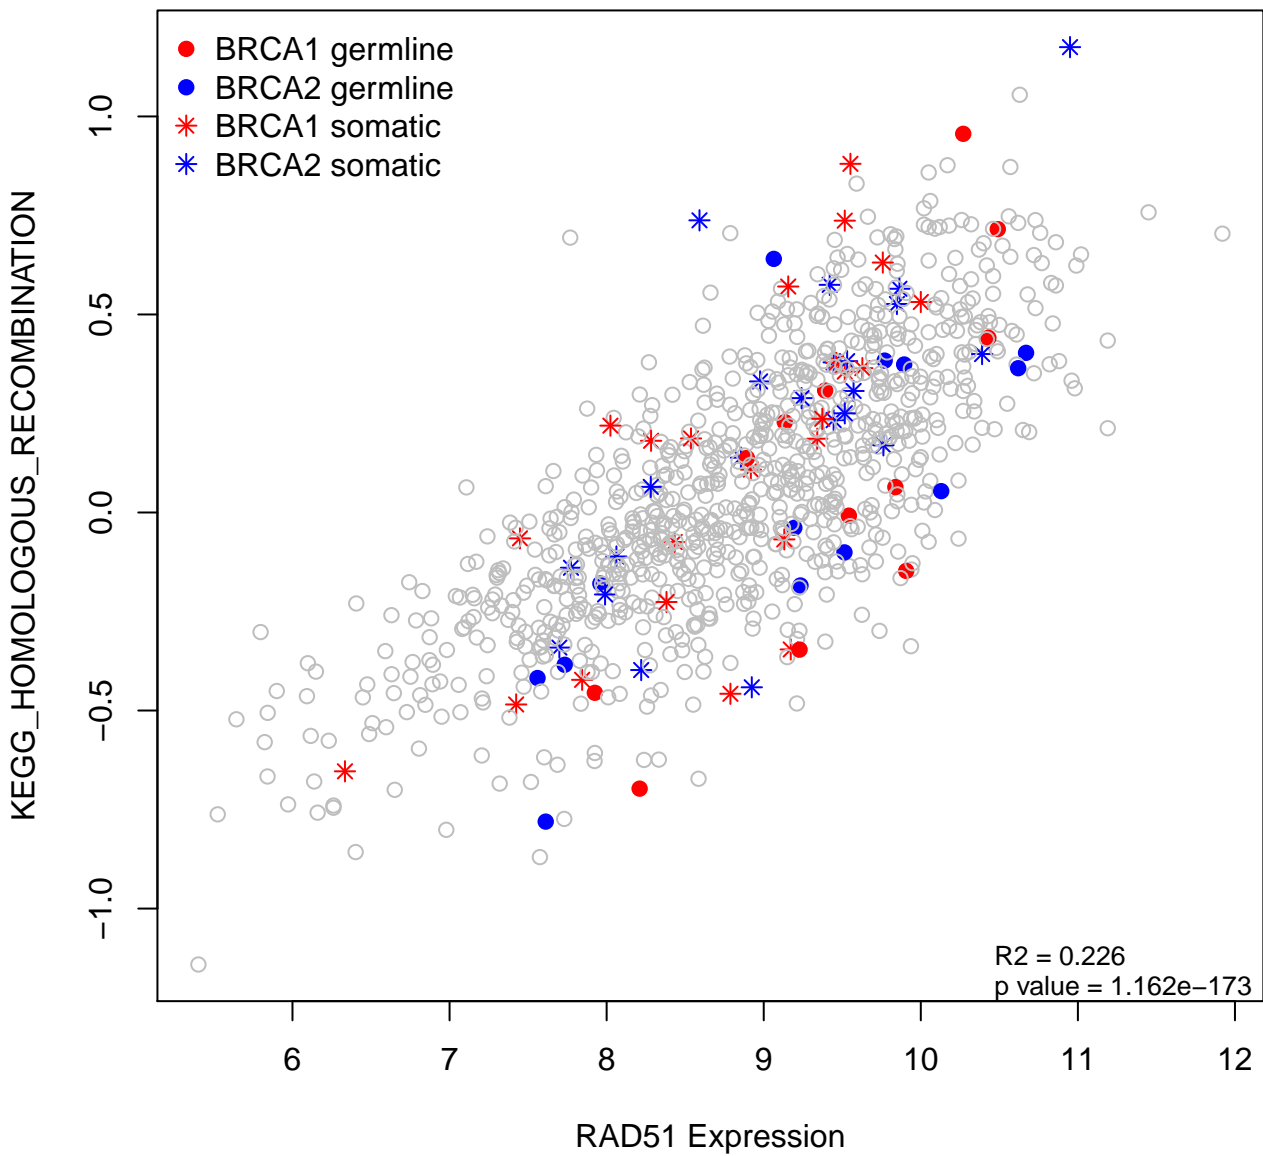

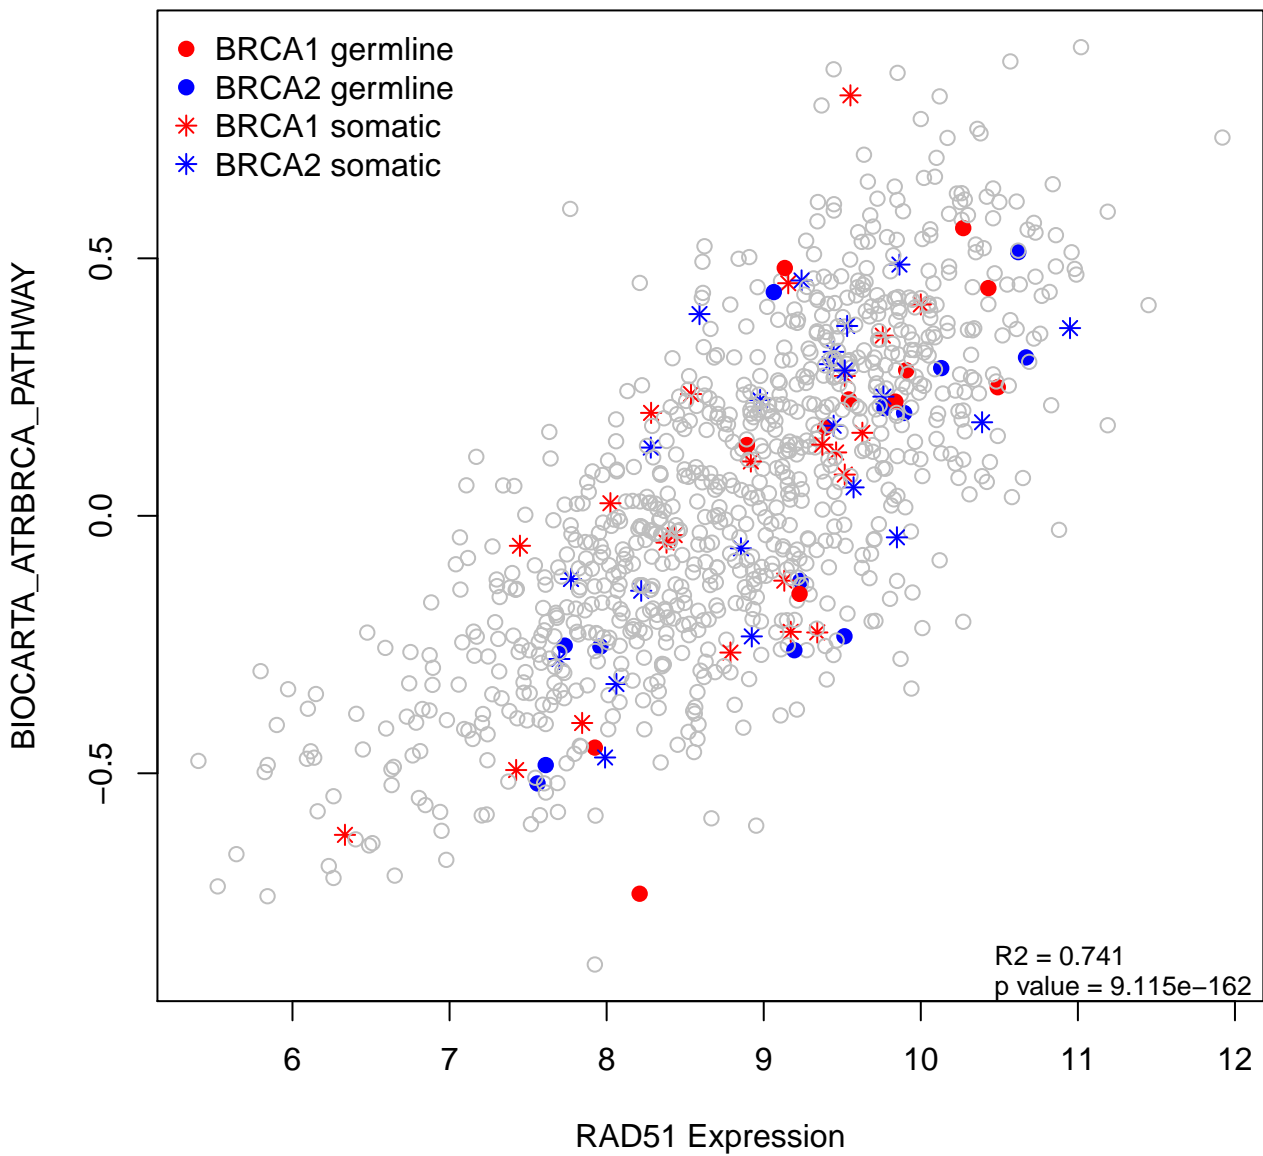

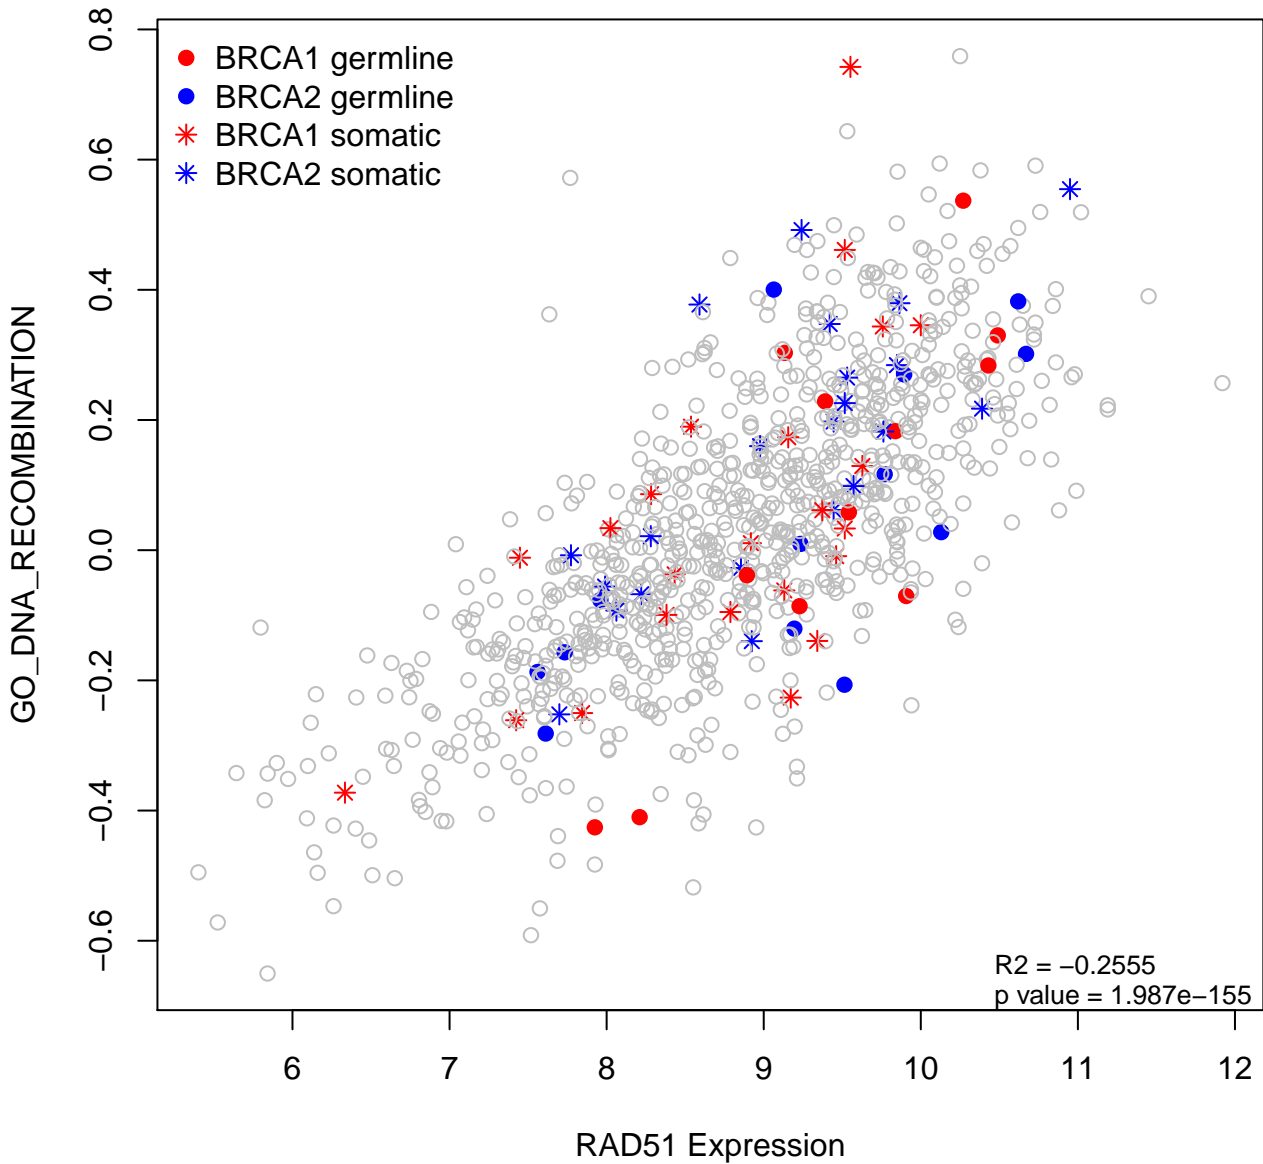

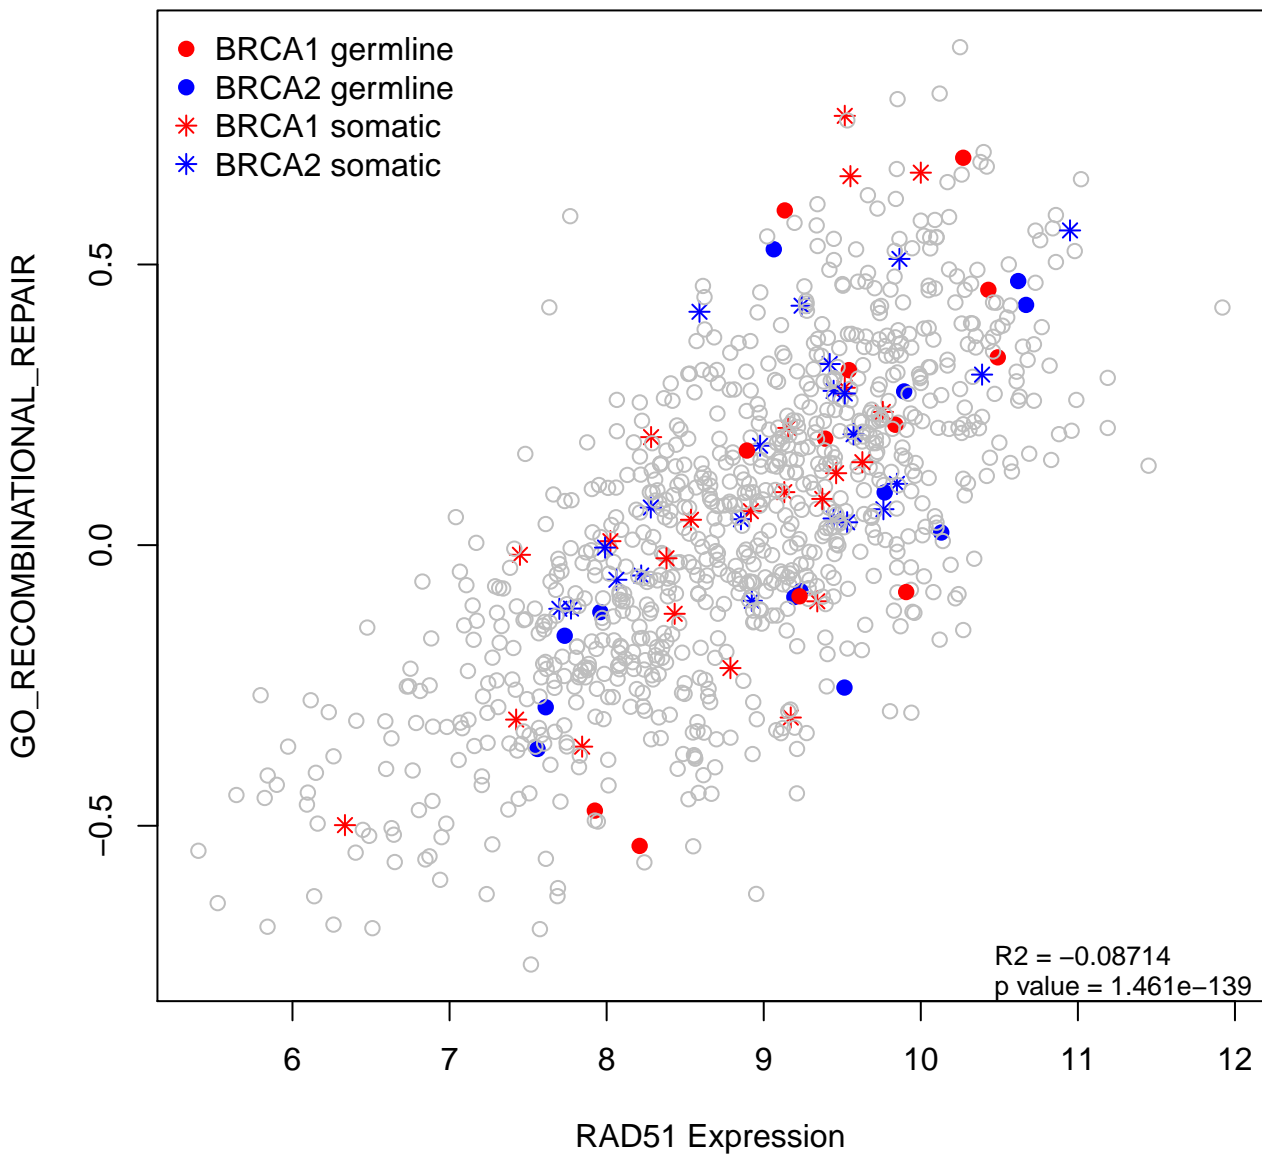

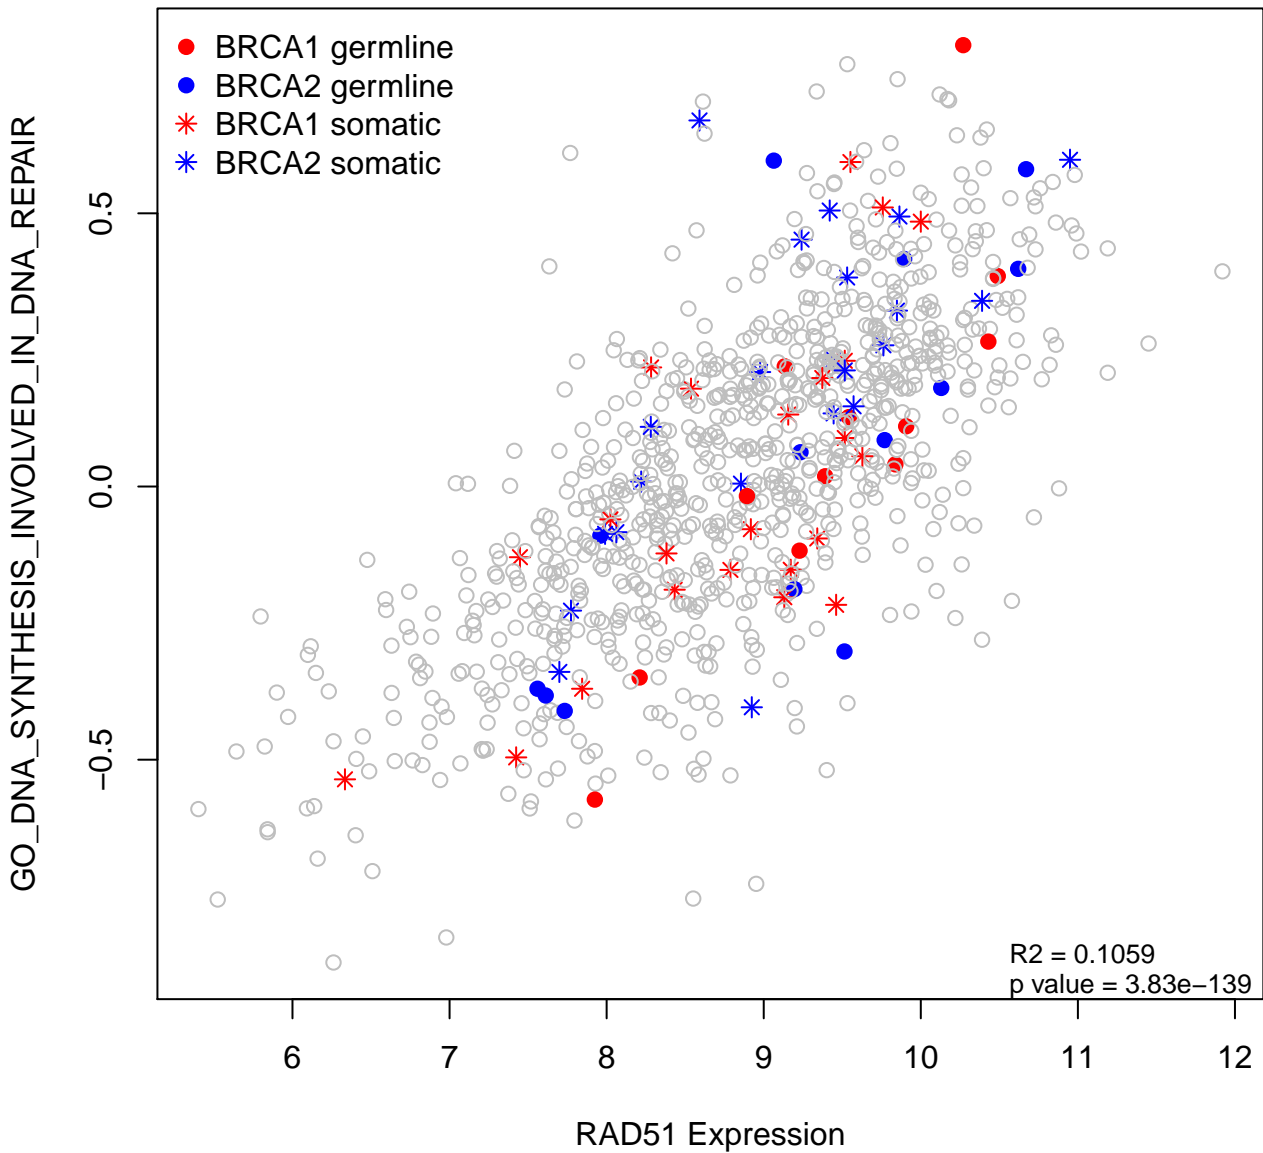



OMOLOGOUS\_RECOMBINATION\_REPAIR\_OF\_REPLICATION\_INDEPENDENT\_DOUBLE\_

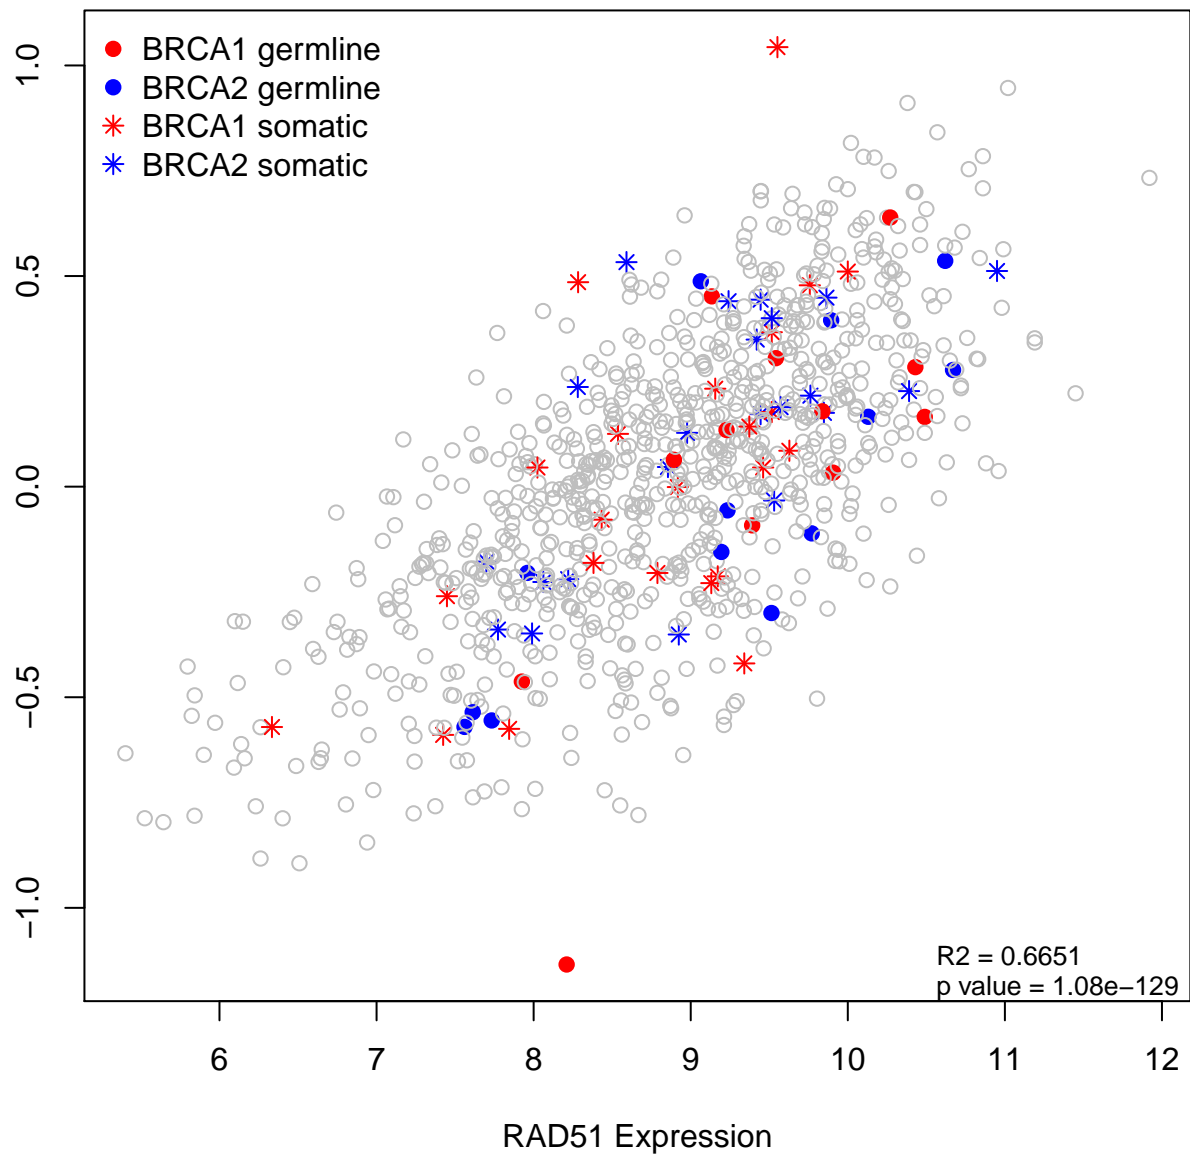

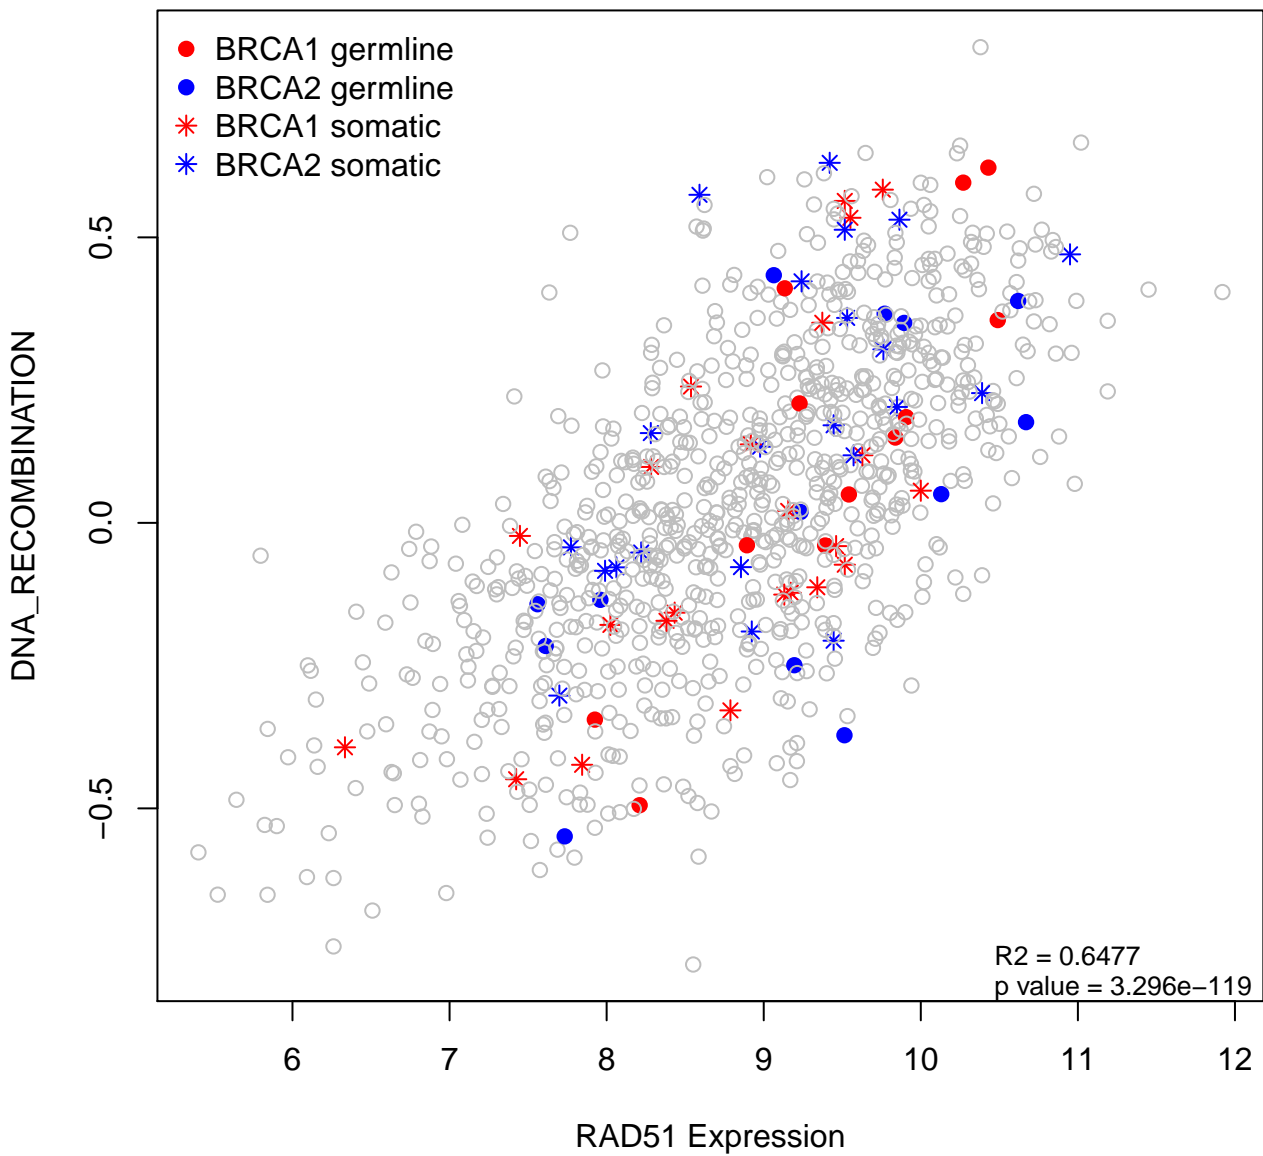

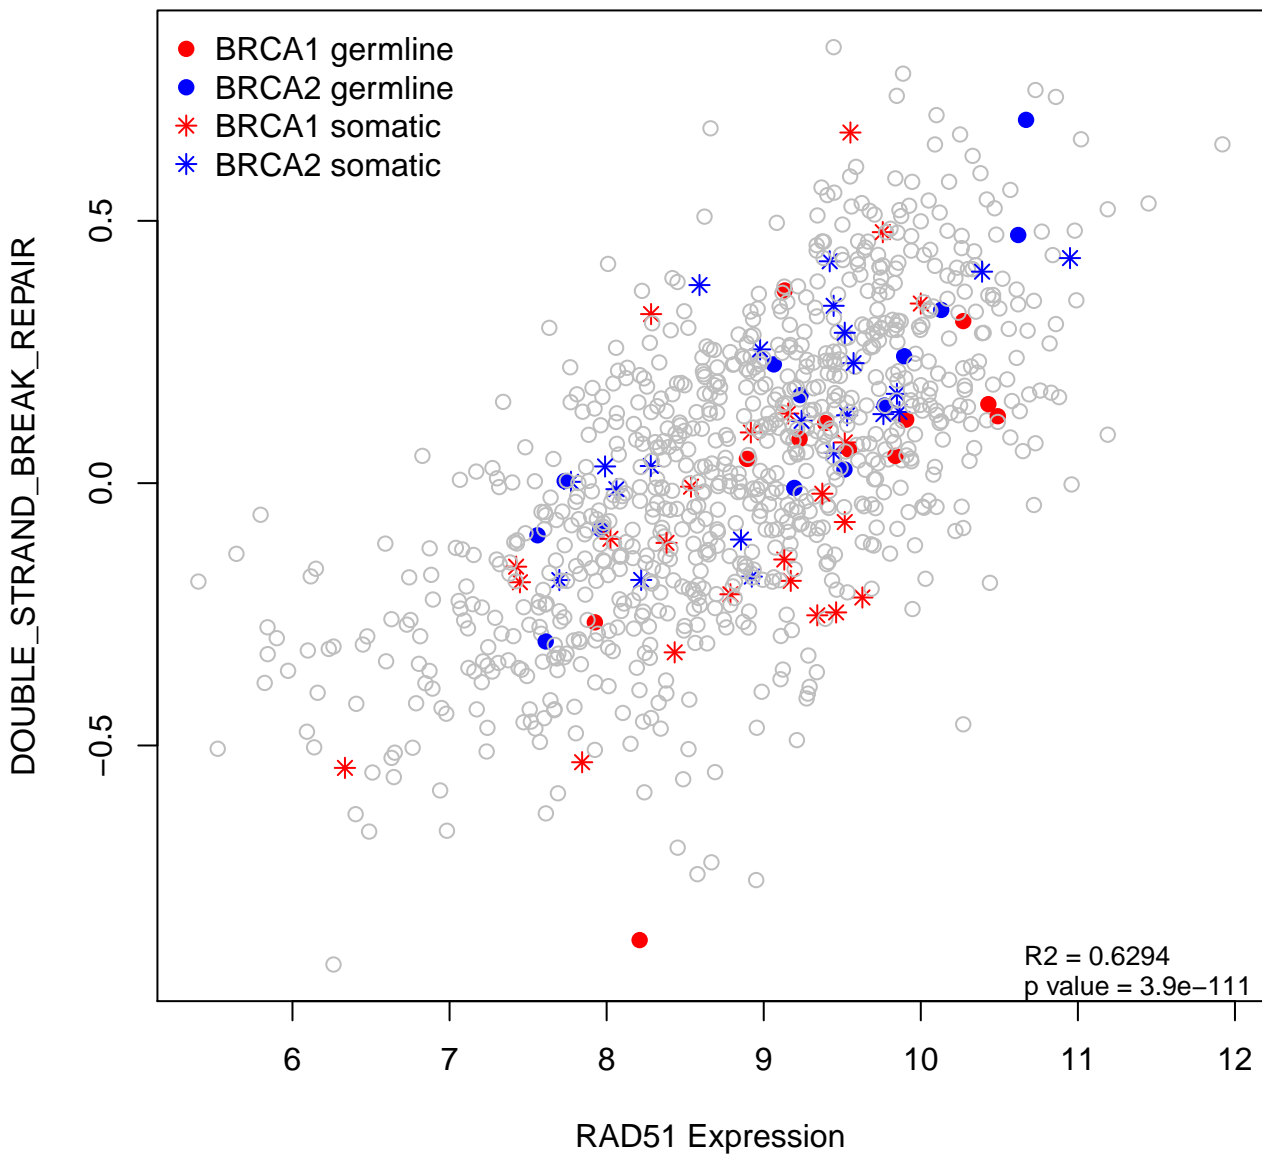

\_REGULATION\_OF\_DOUBLE\_STRAND\_BREAK\_REPAIR\_VIA\_HOMOLOGOUS\_RECOMBIN

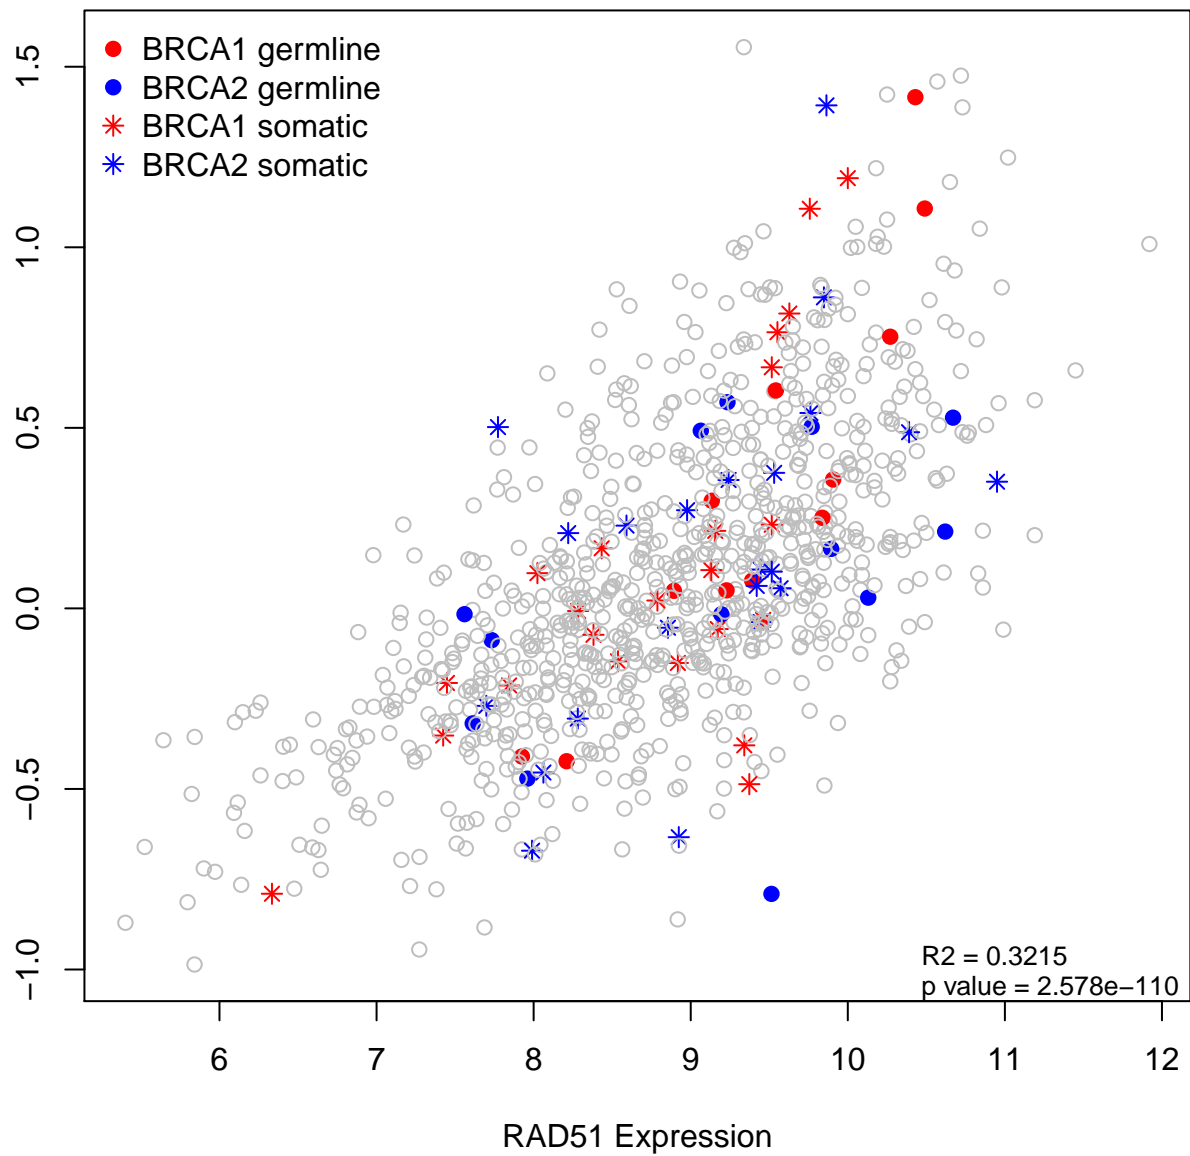

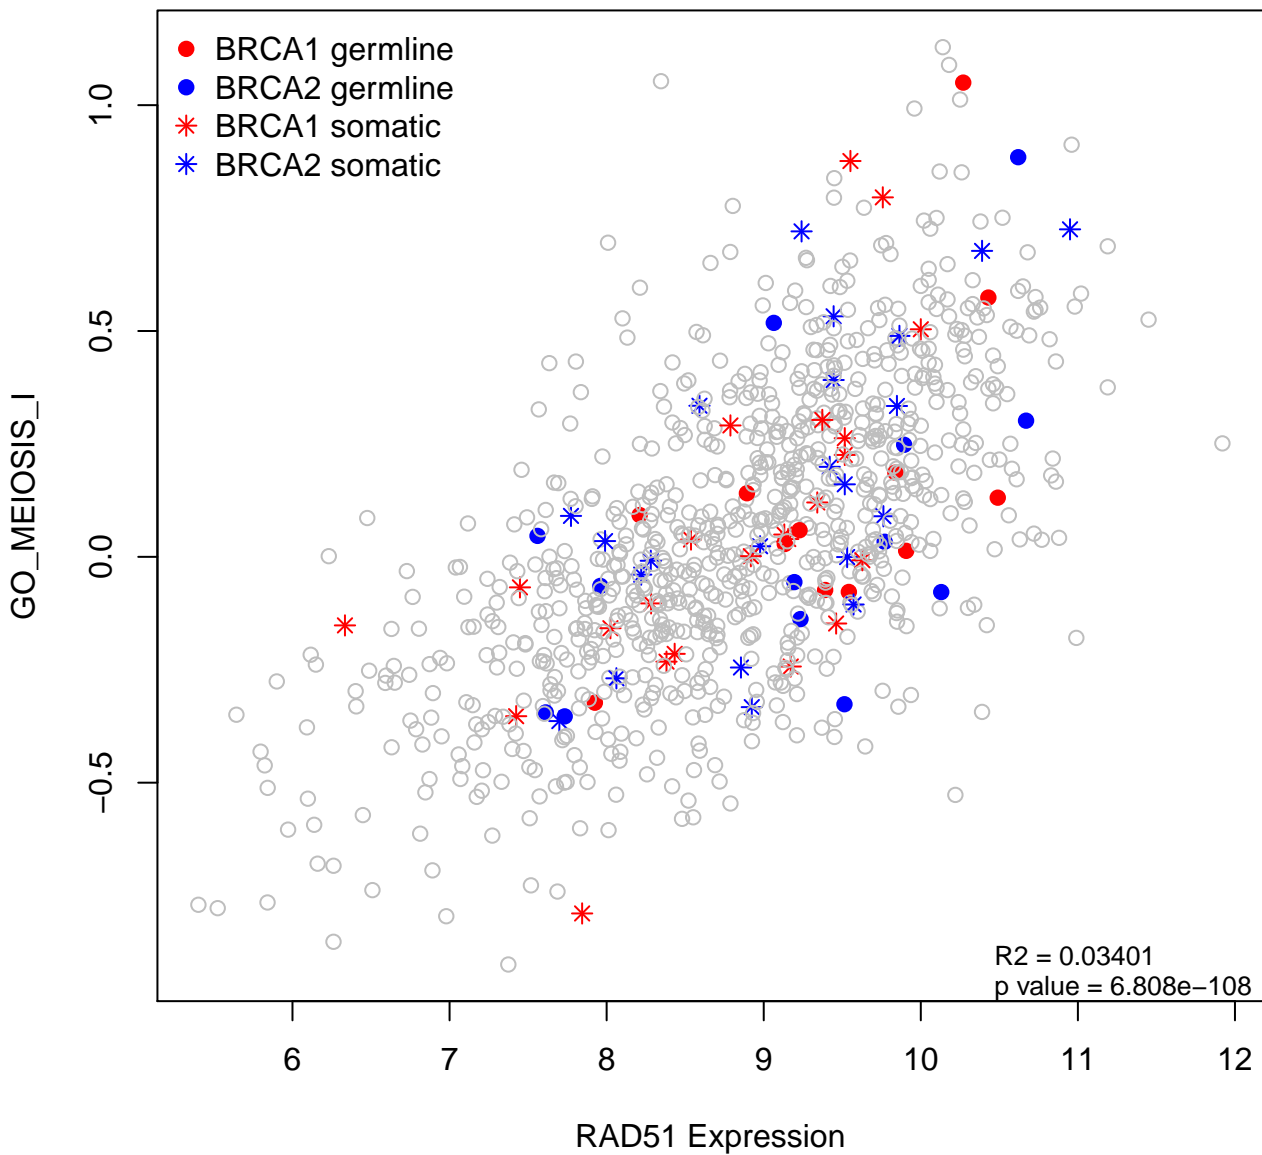

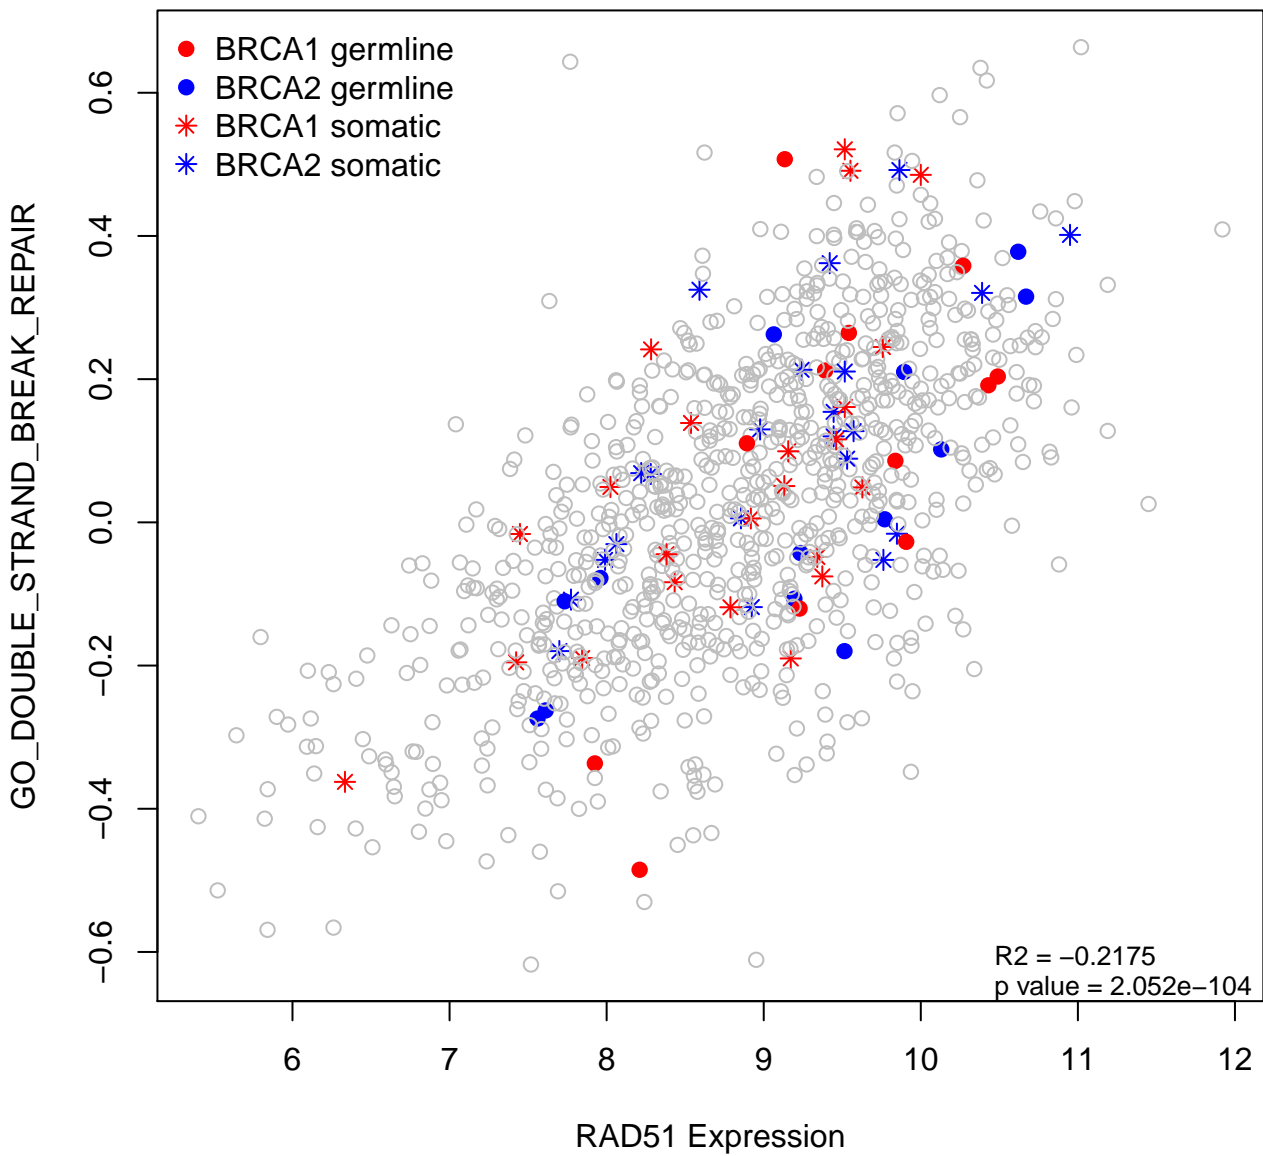

GEORGES\_CELL\_CYCLE\_MIR192\_TARGETS

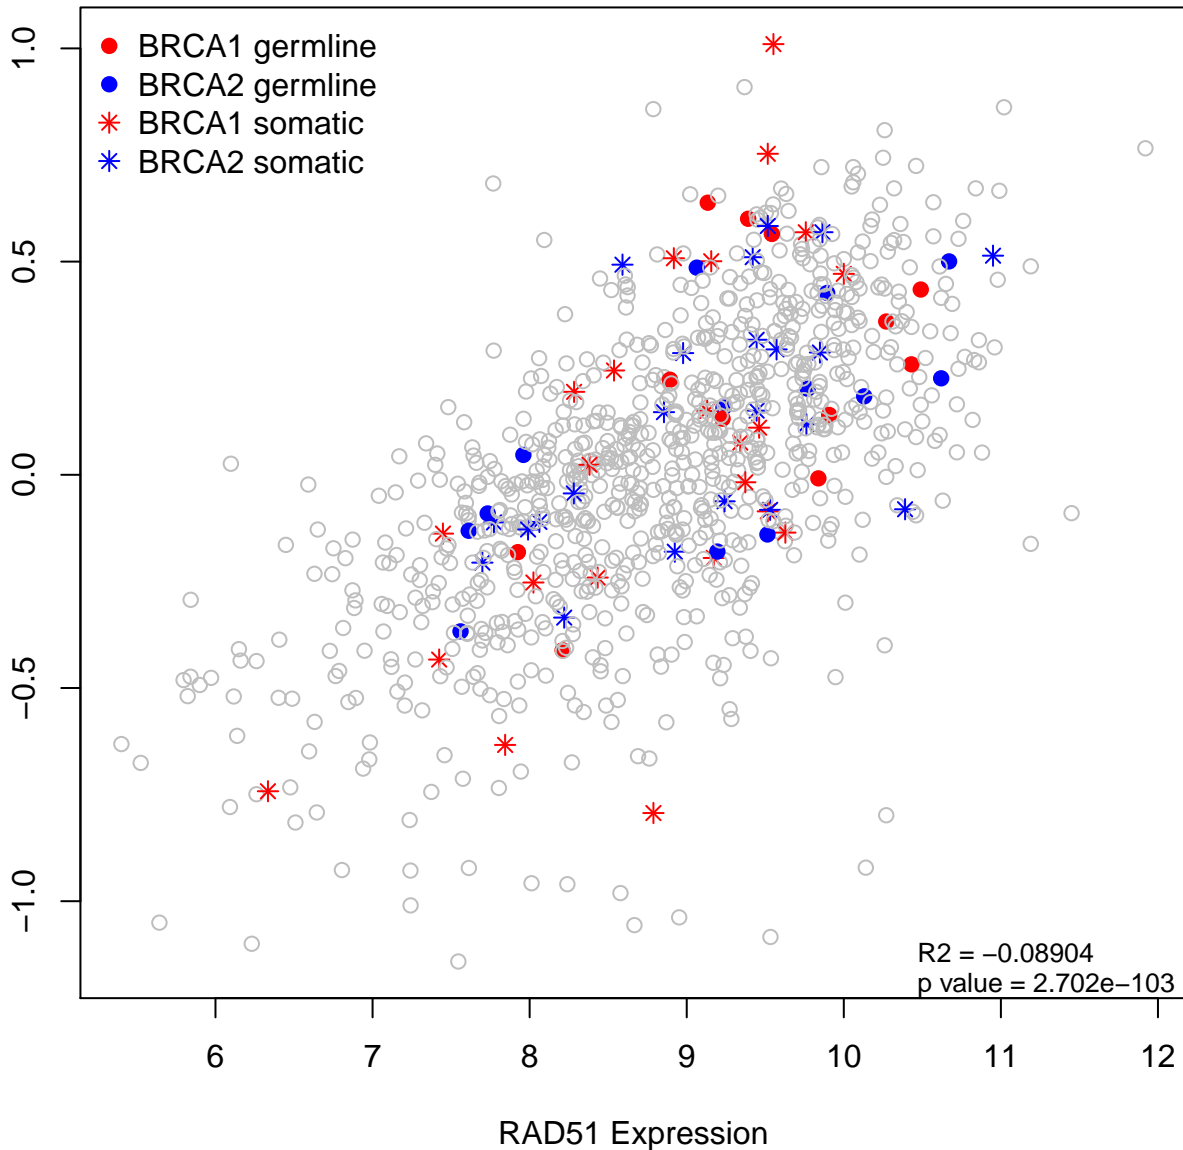

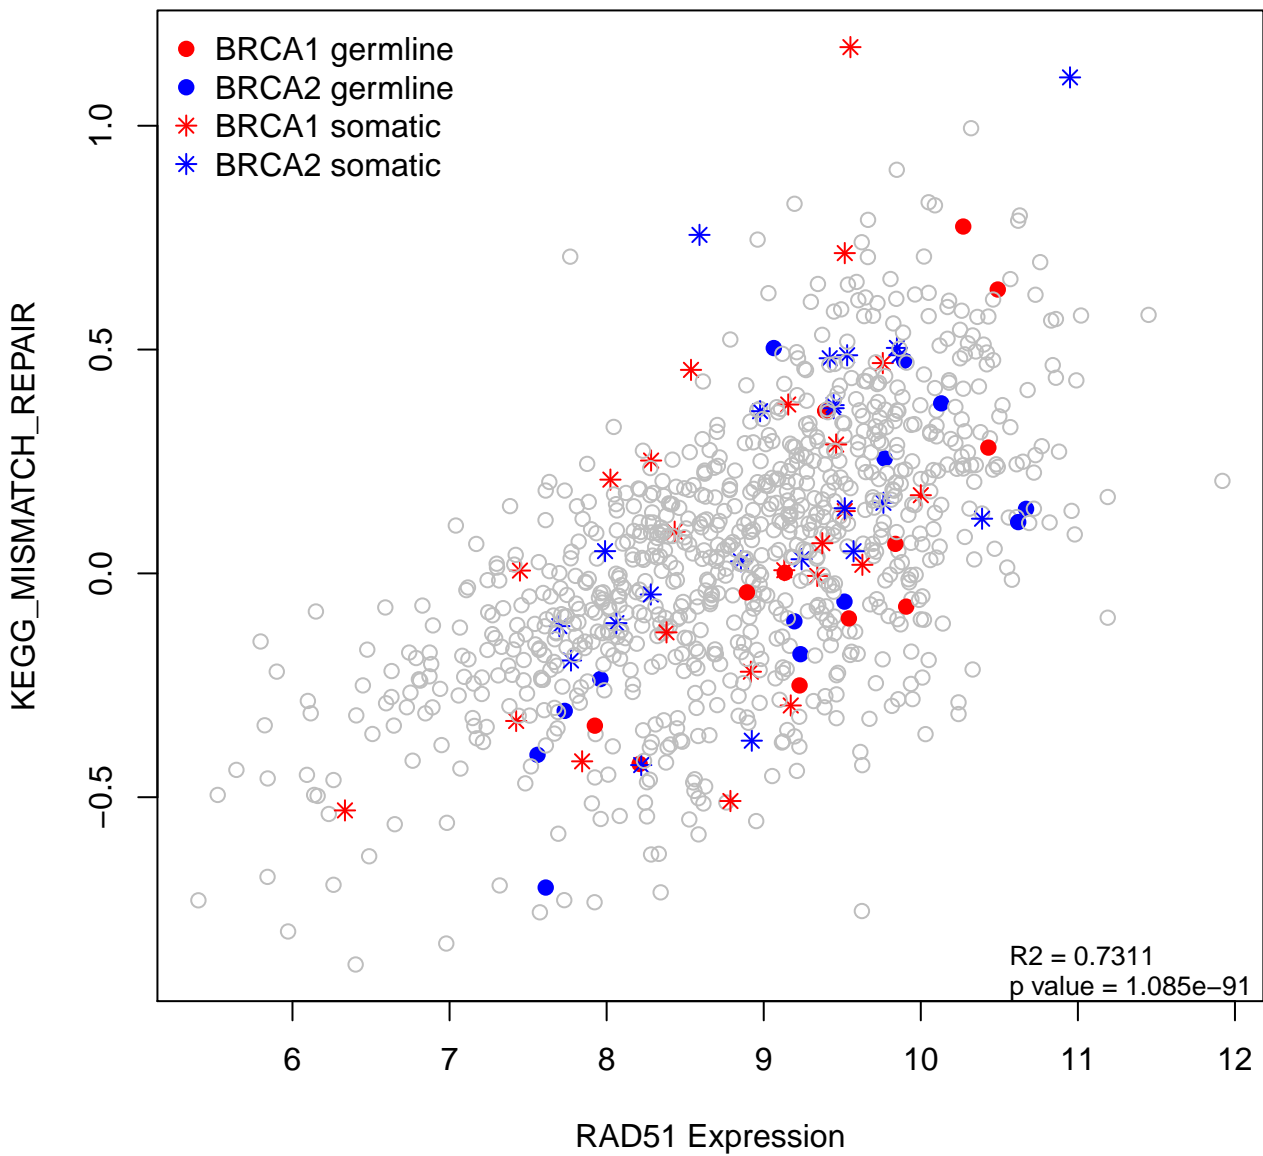



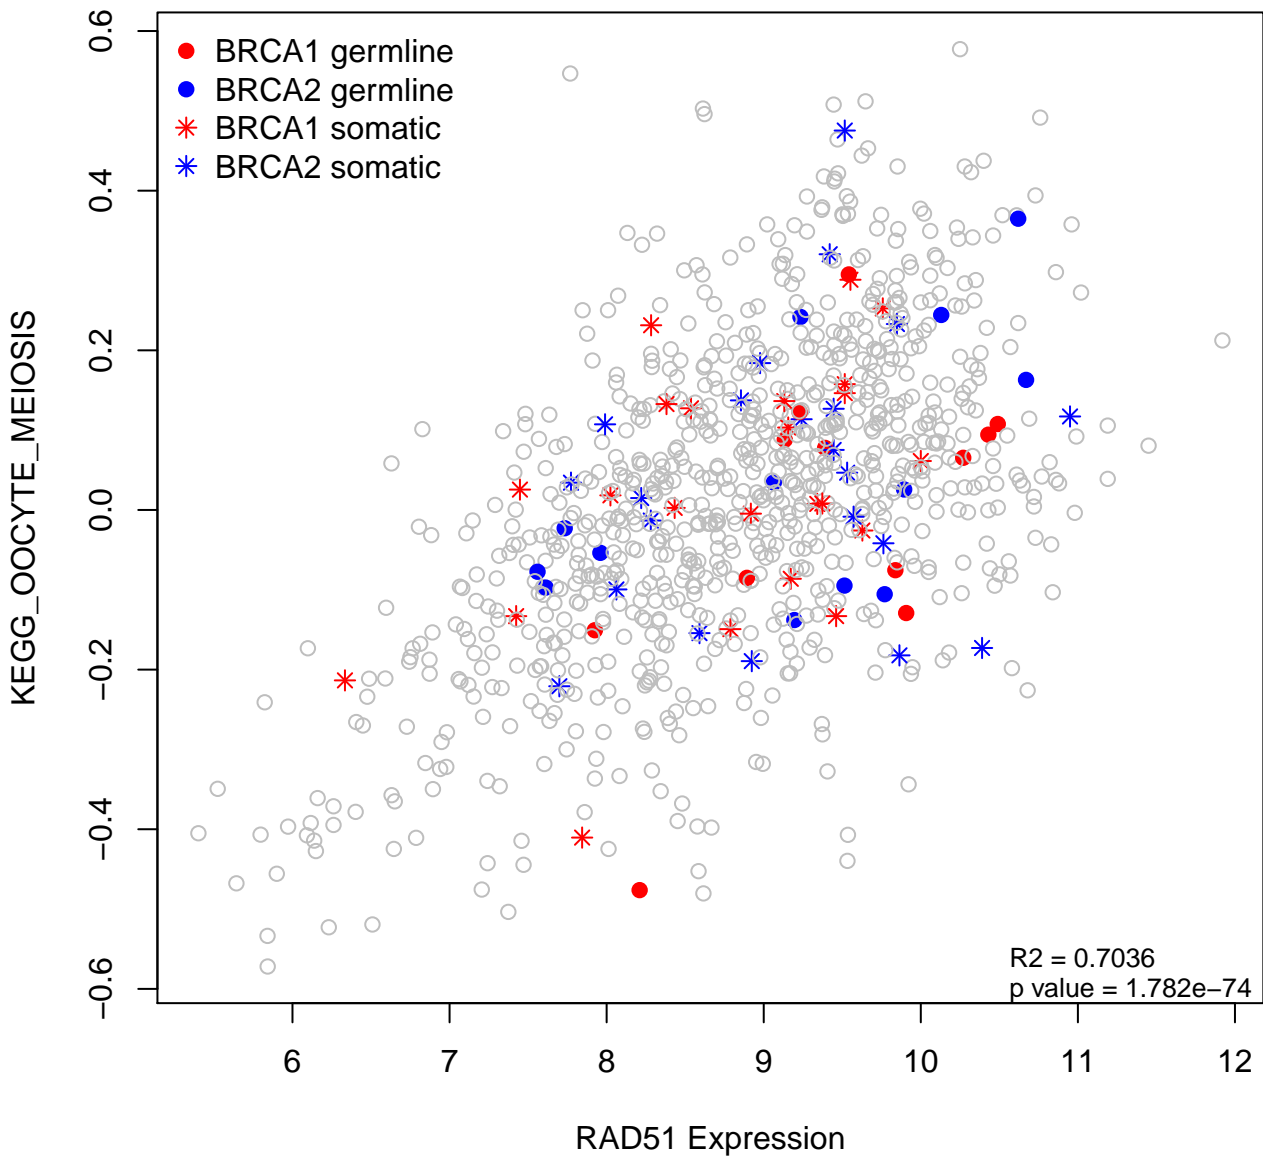

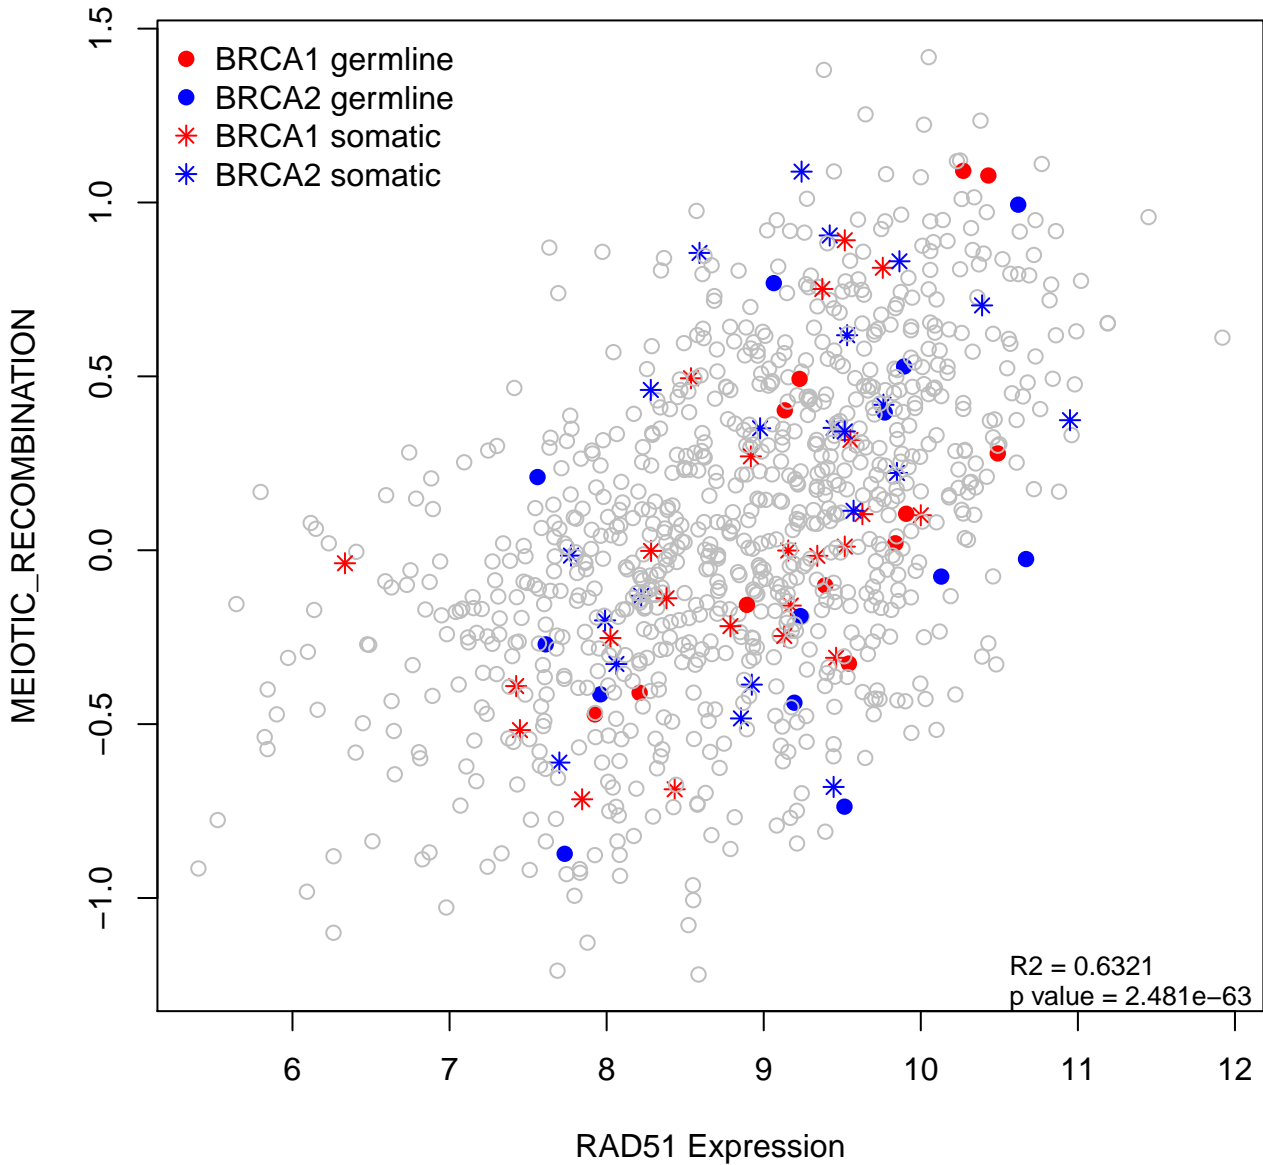

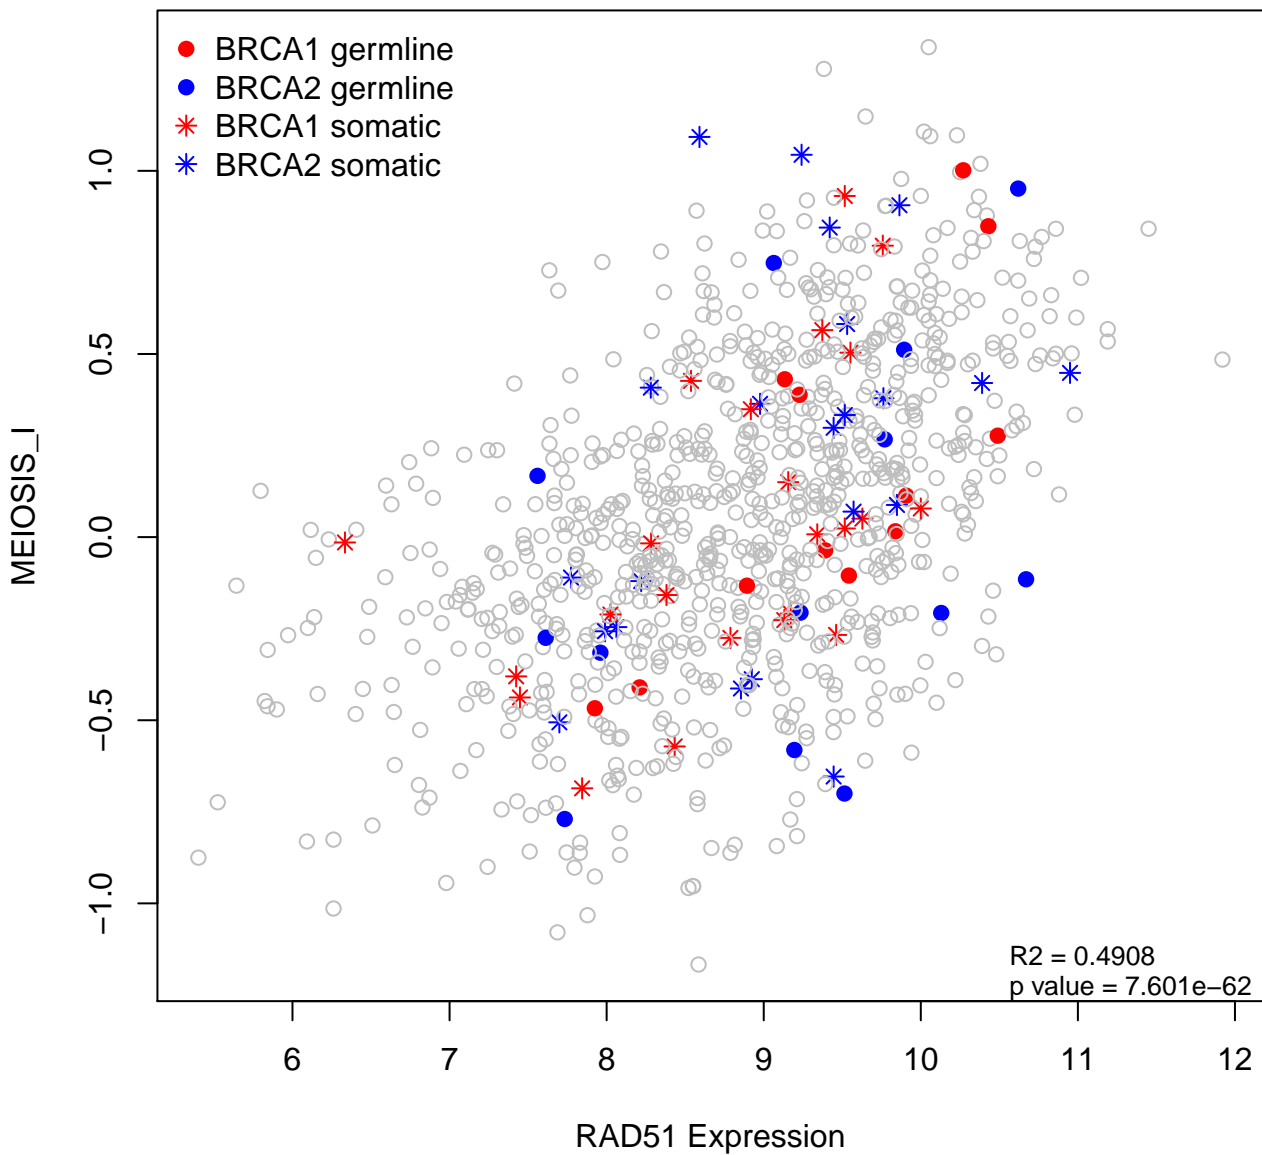

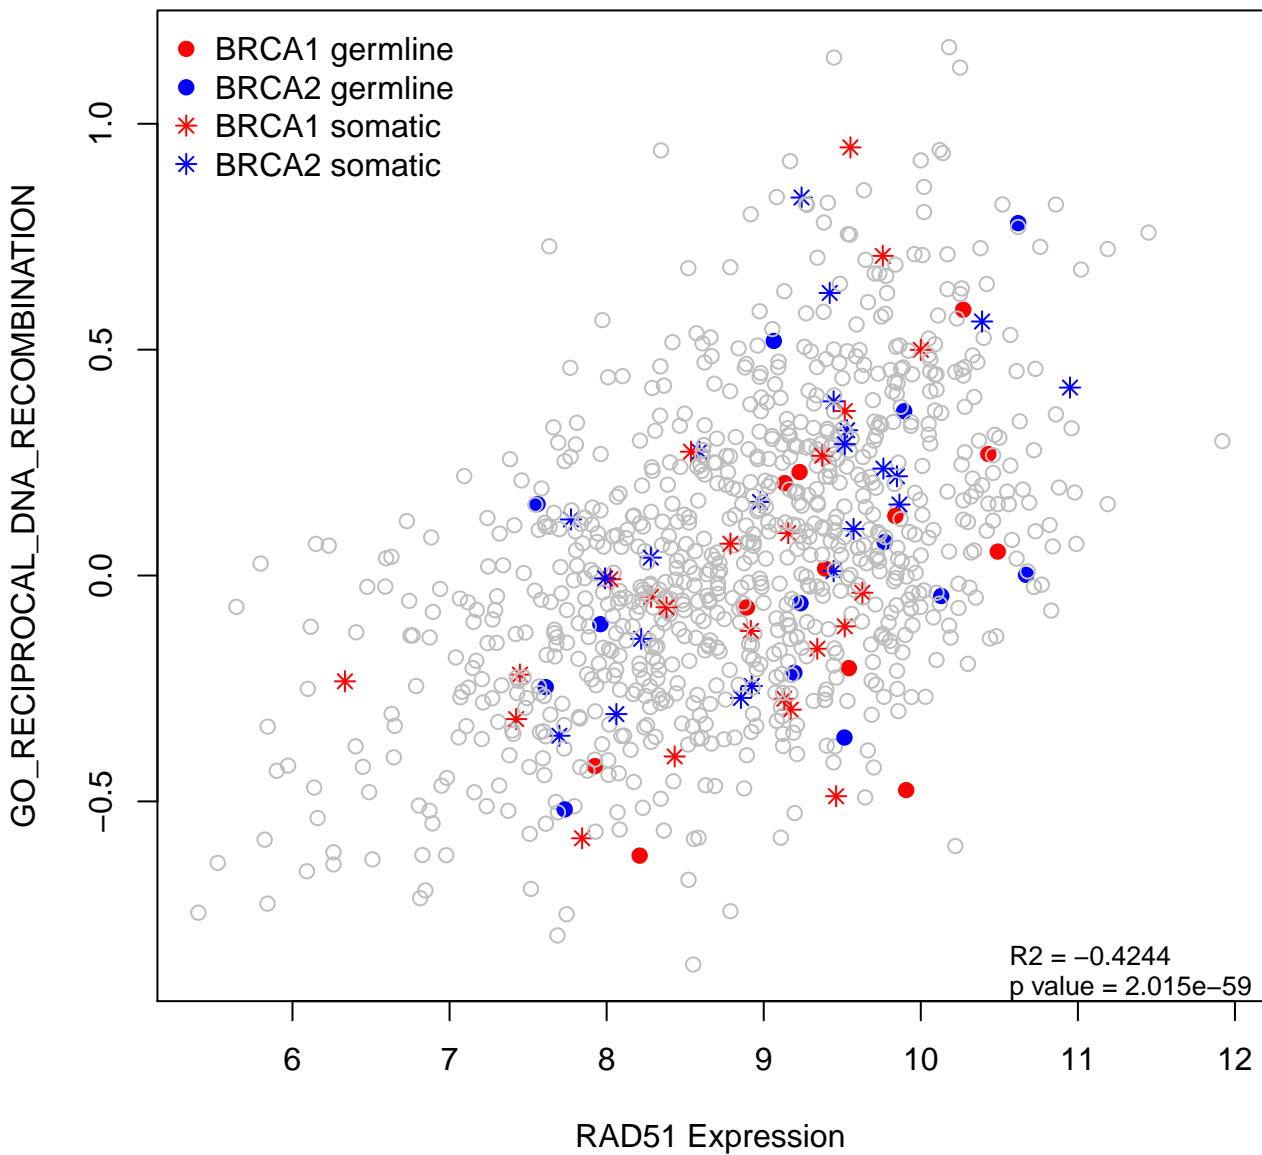

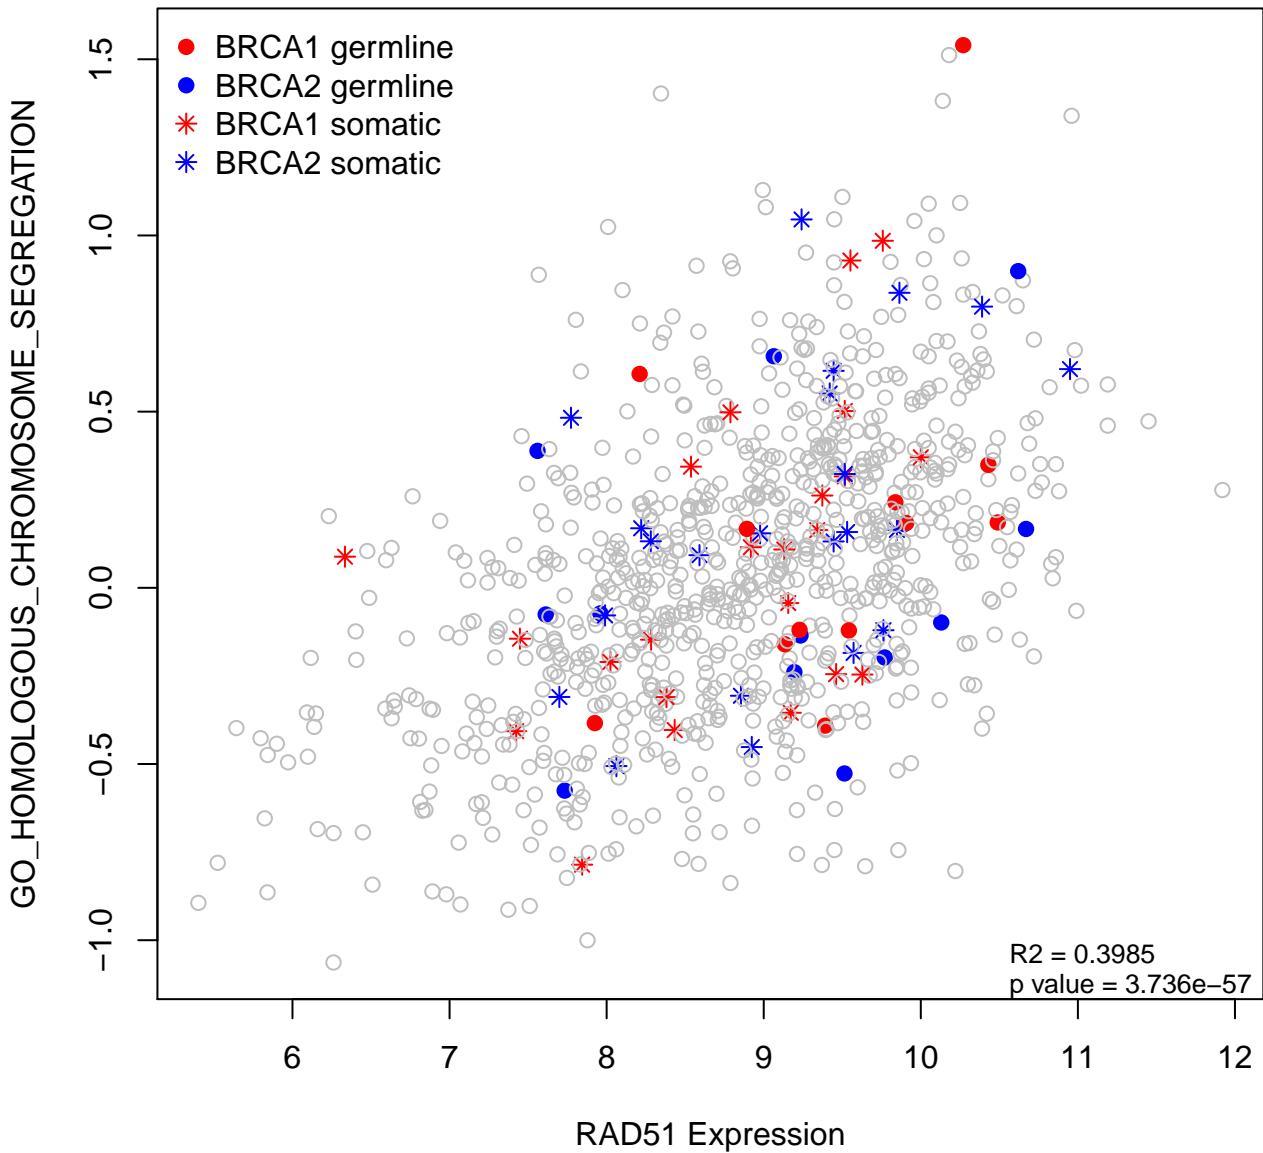

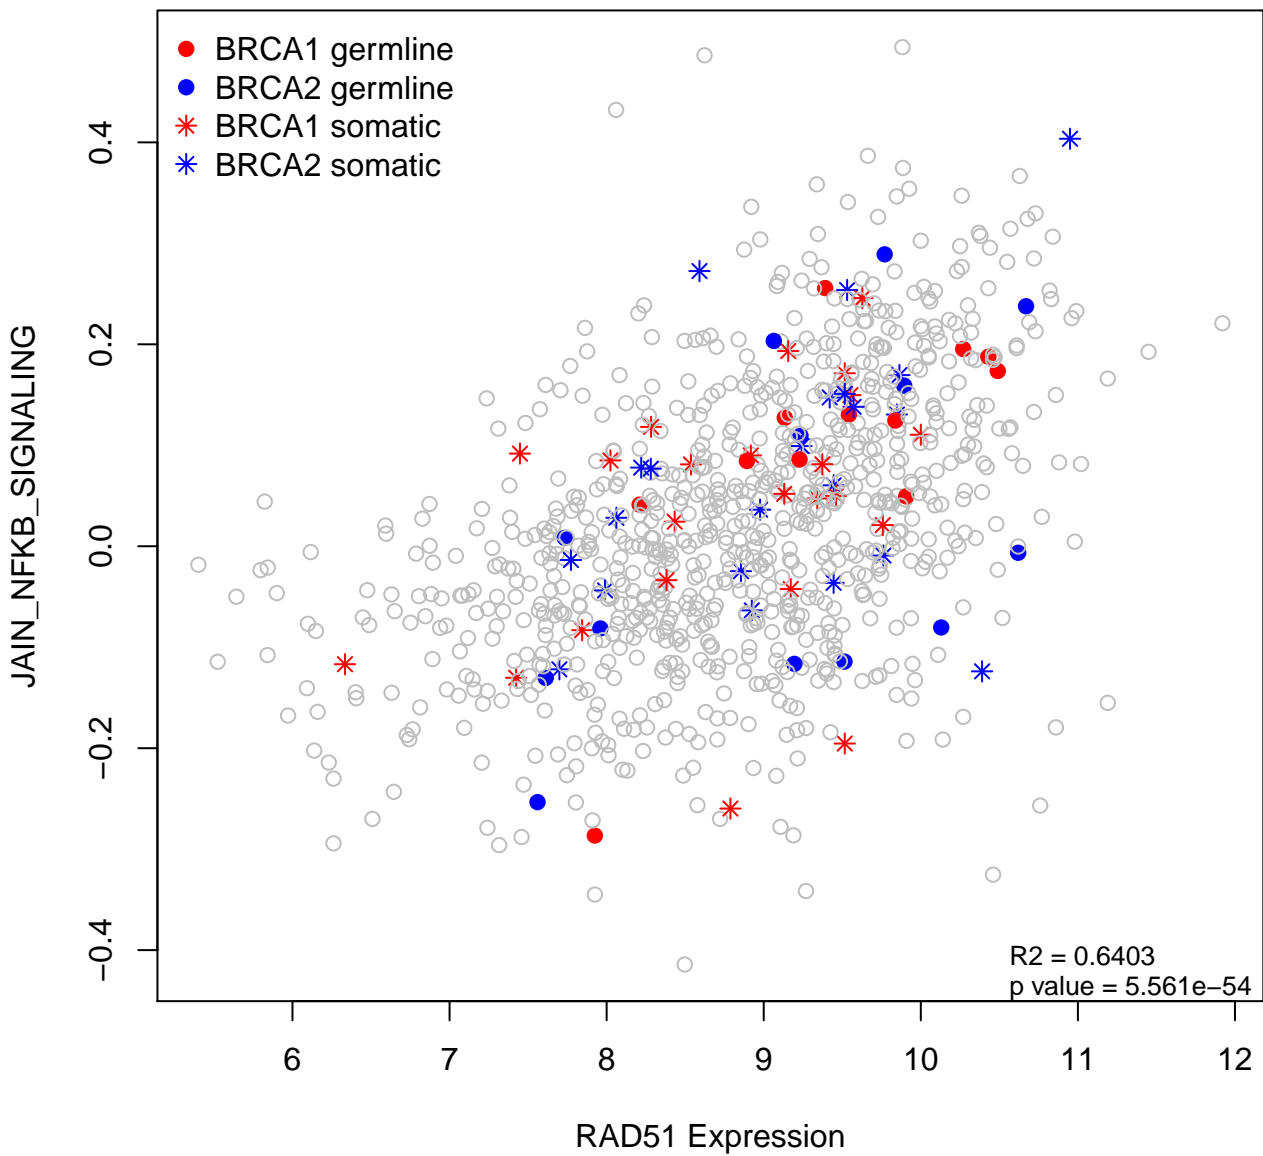

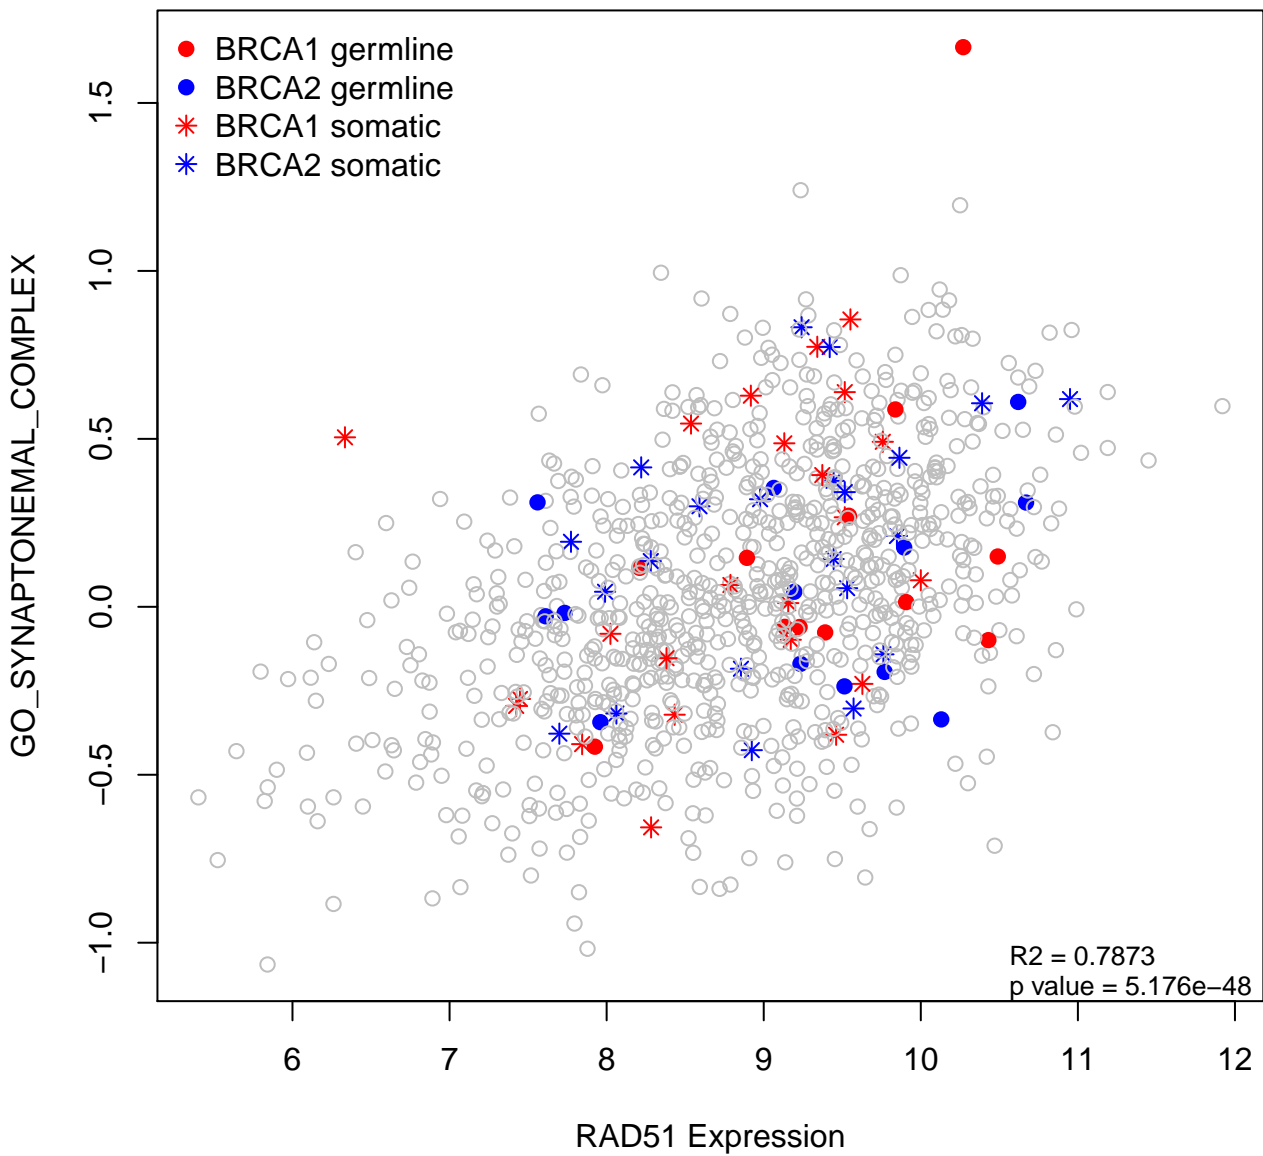

GO\_SOMATIC\_RECOMBINATION\_OF\_IMMUNOGLOBULIN\_GENE\_SEGMENTS

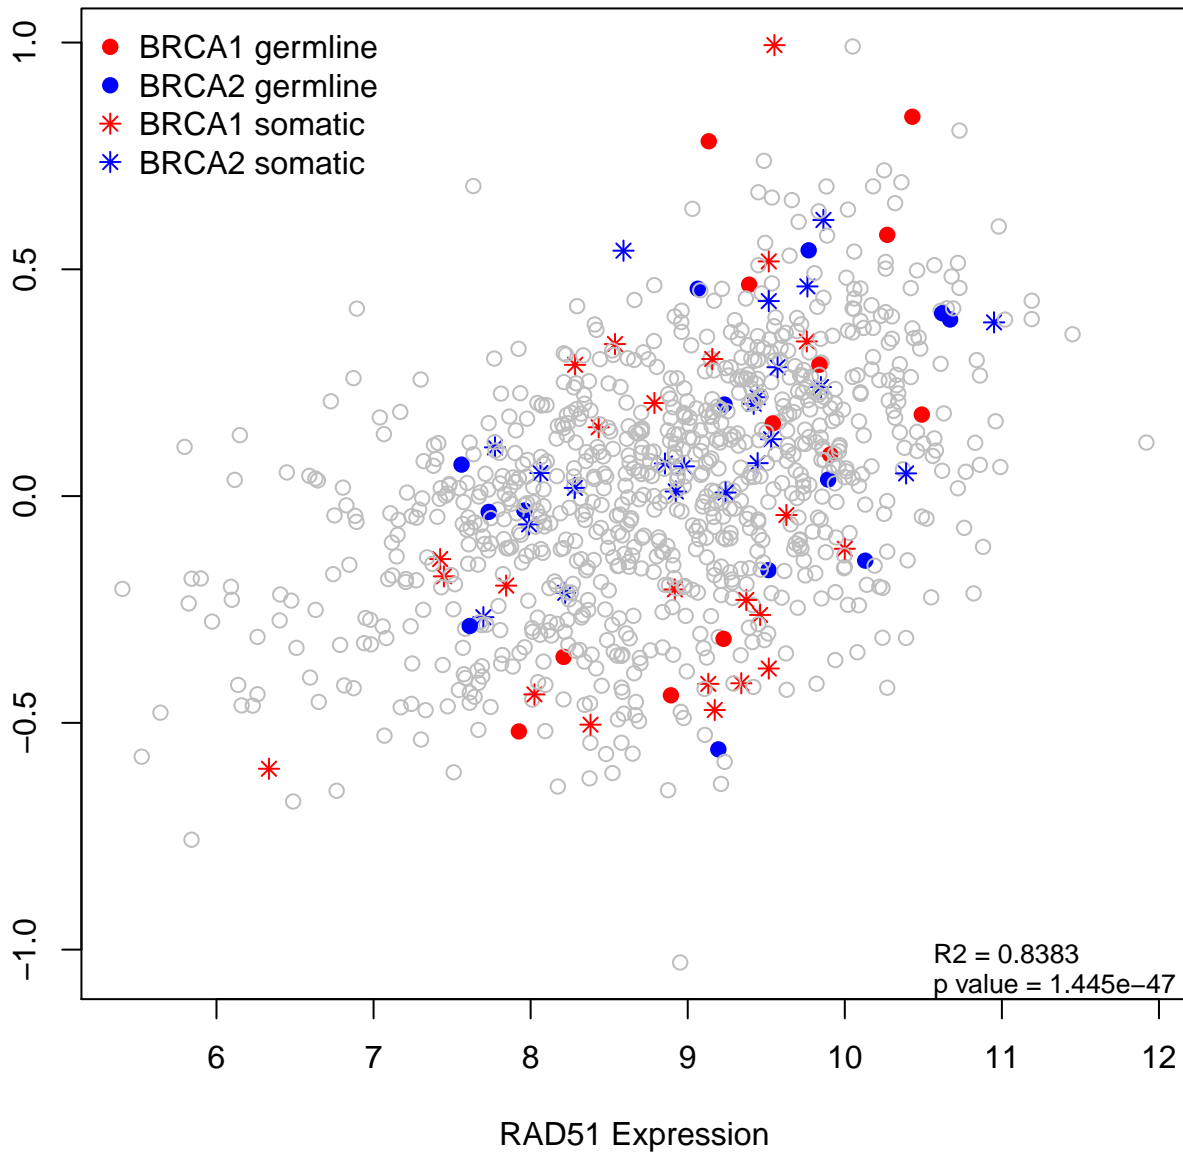



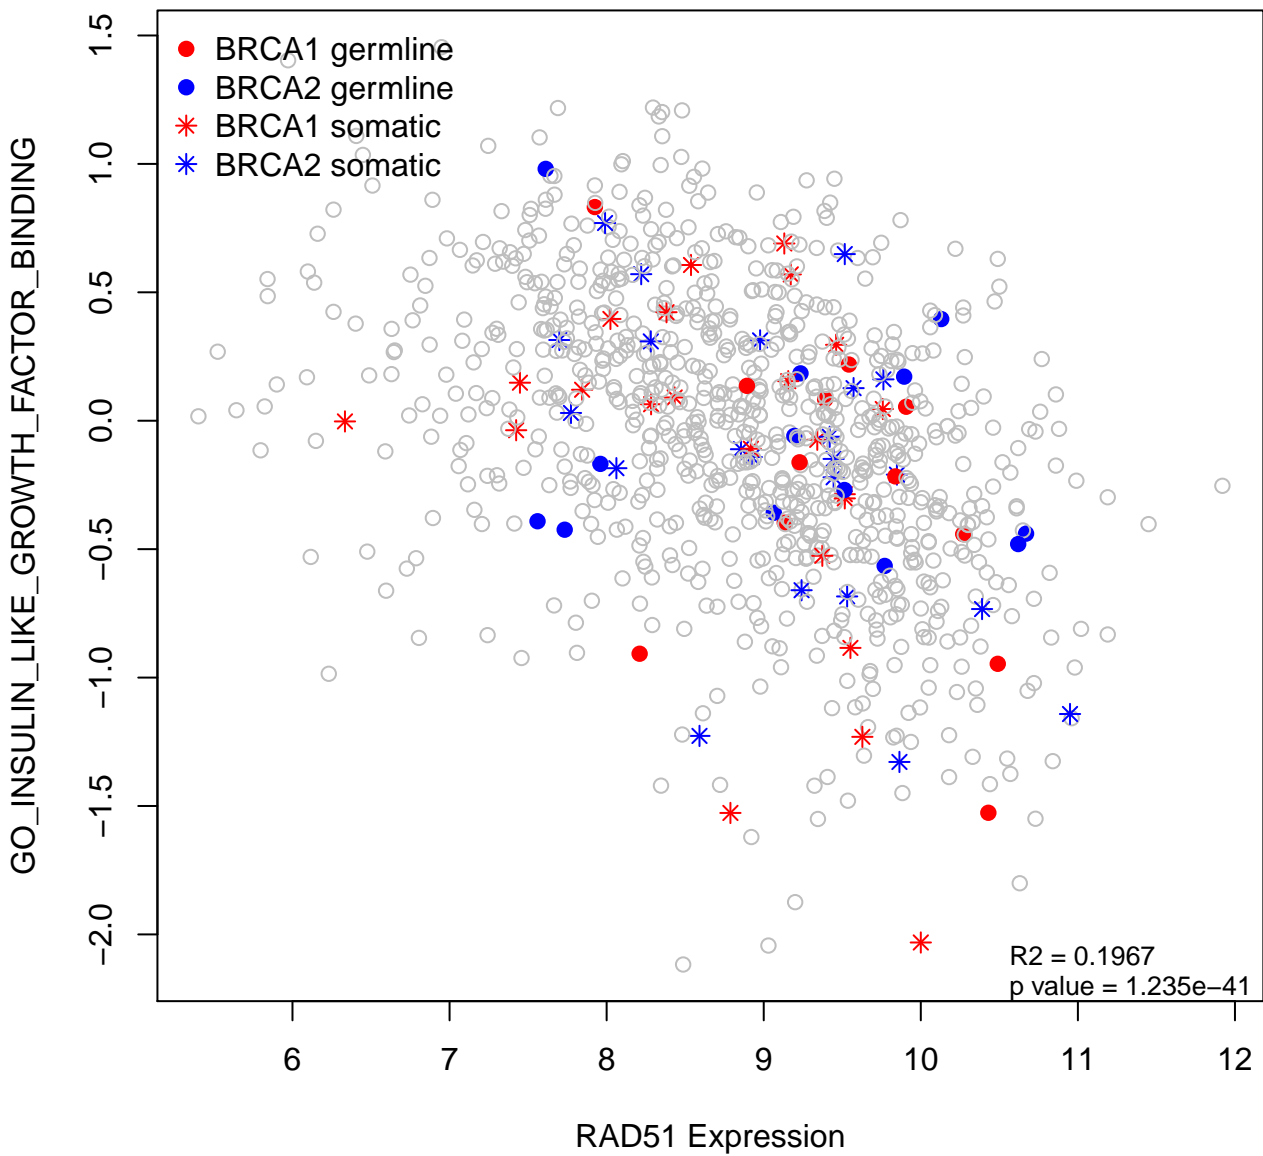

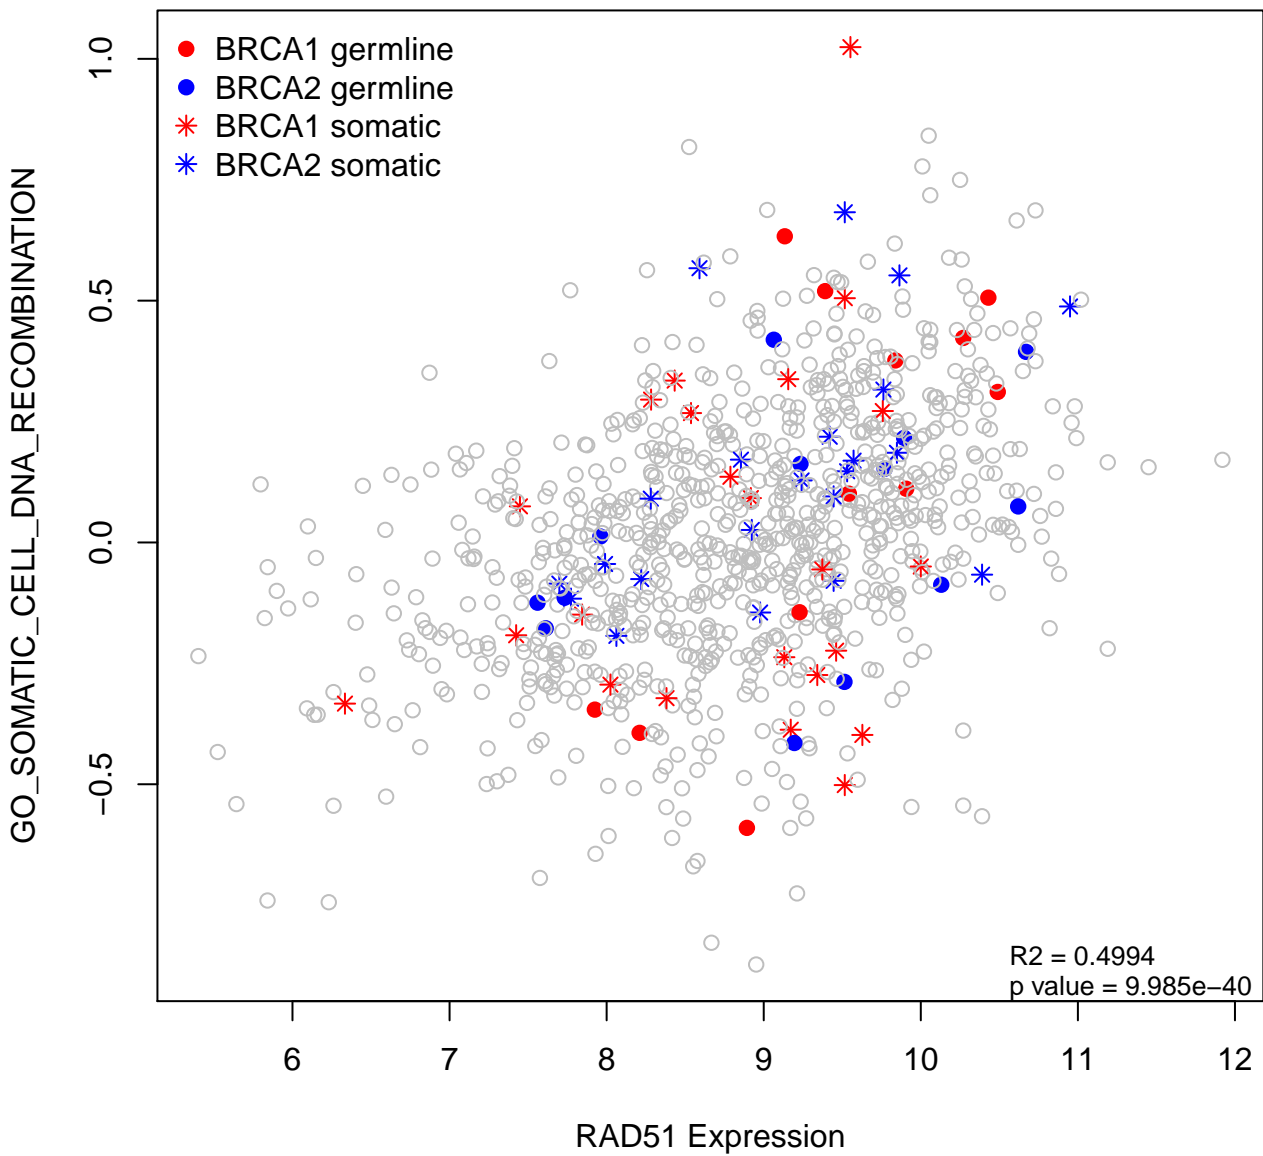

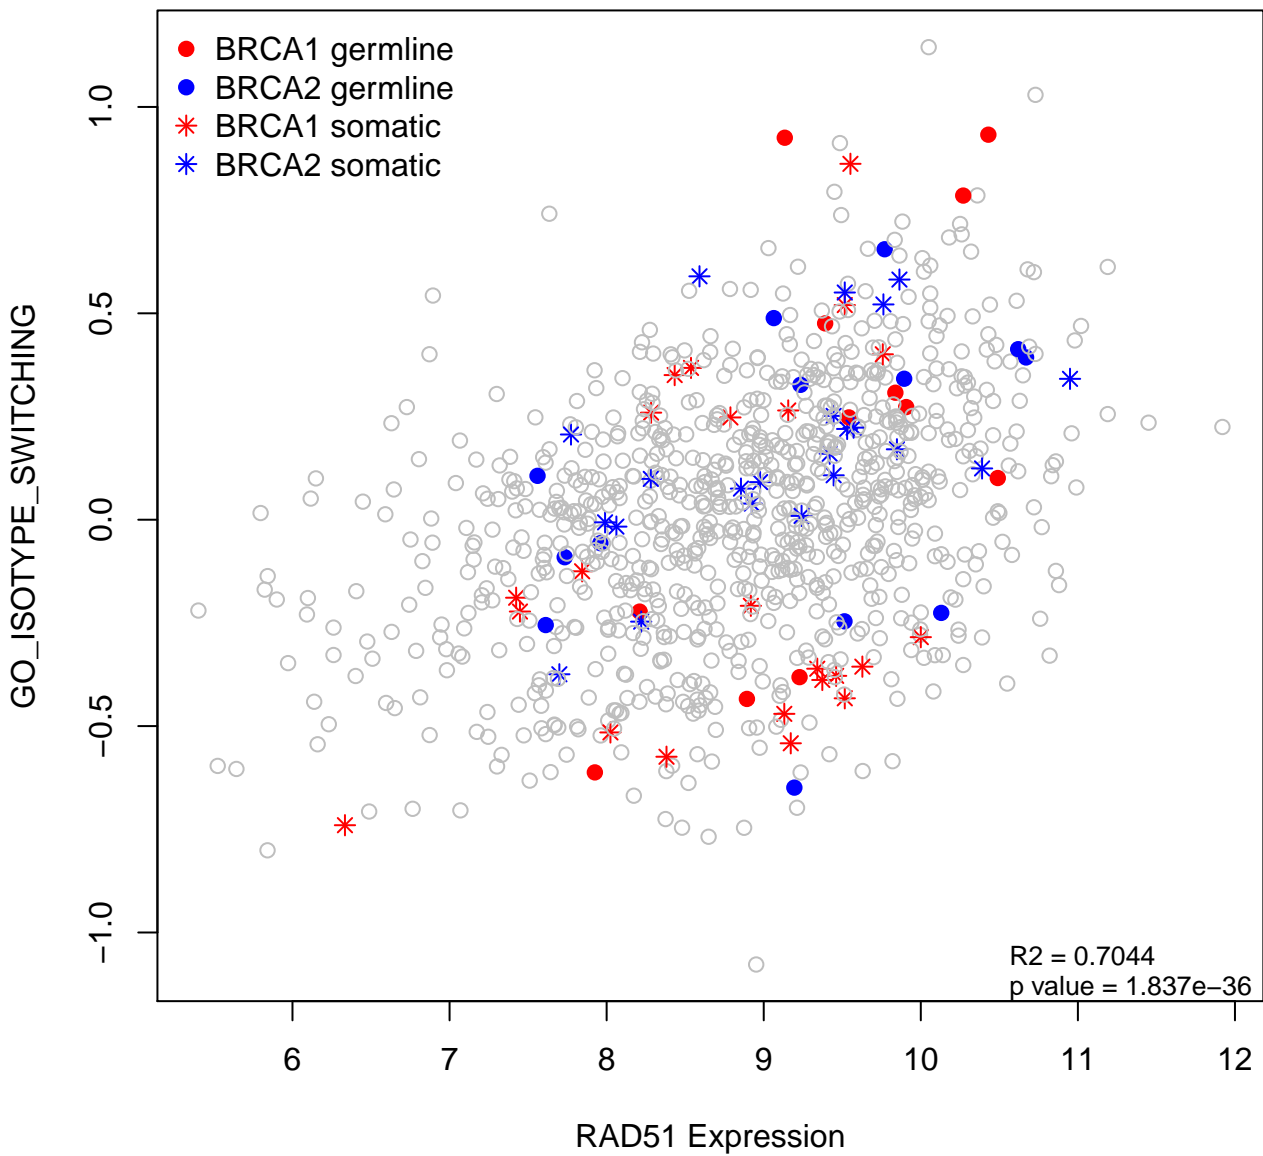

GEORGES\_TARGETS\_OF\_MIR192\_AND\_MIR215

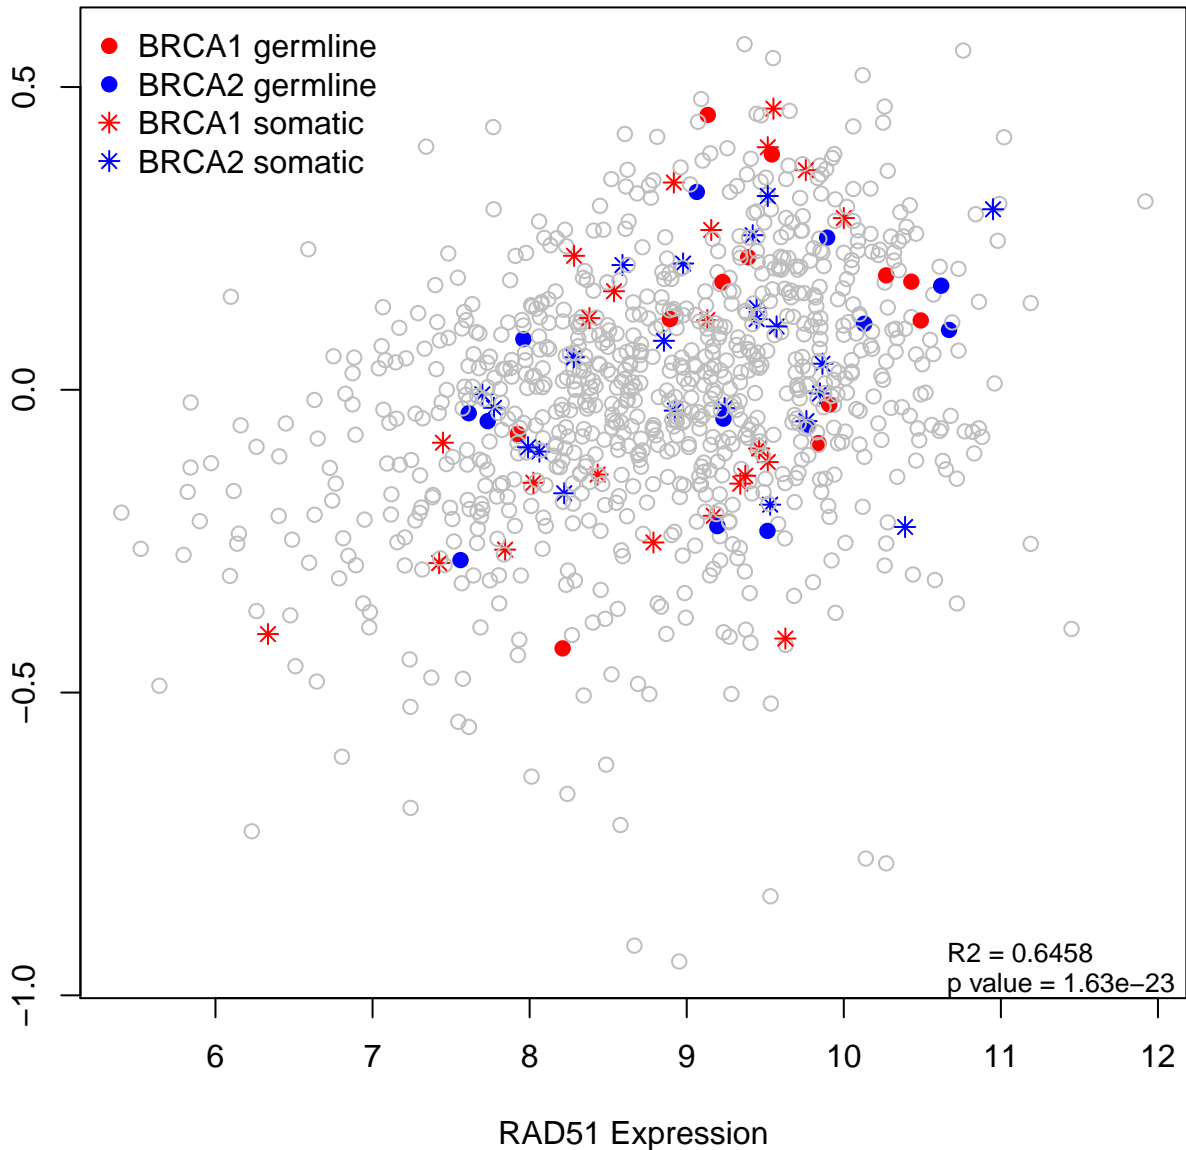

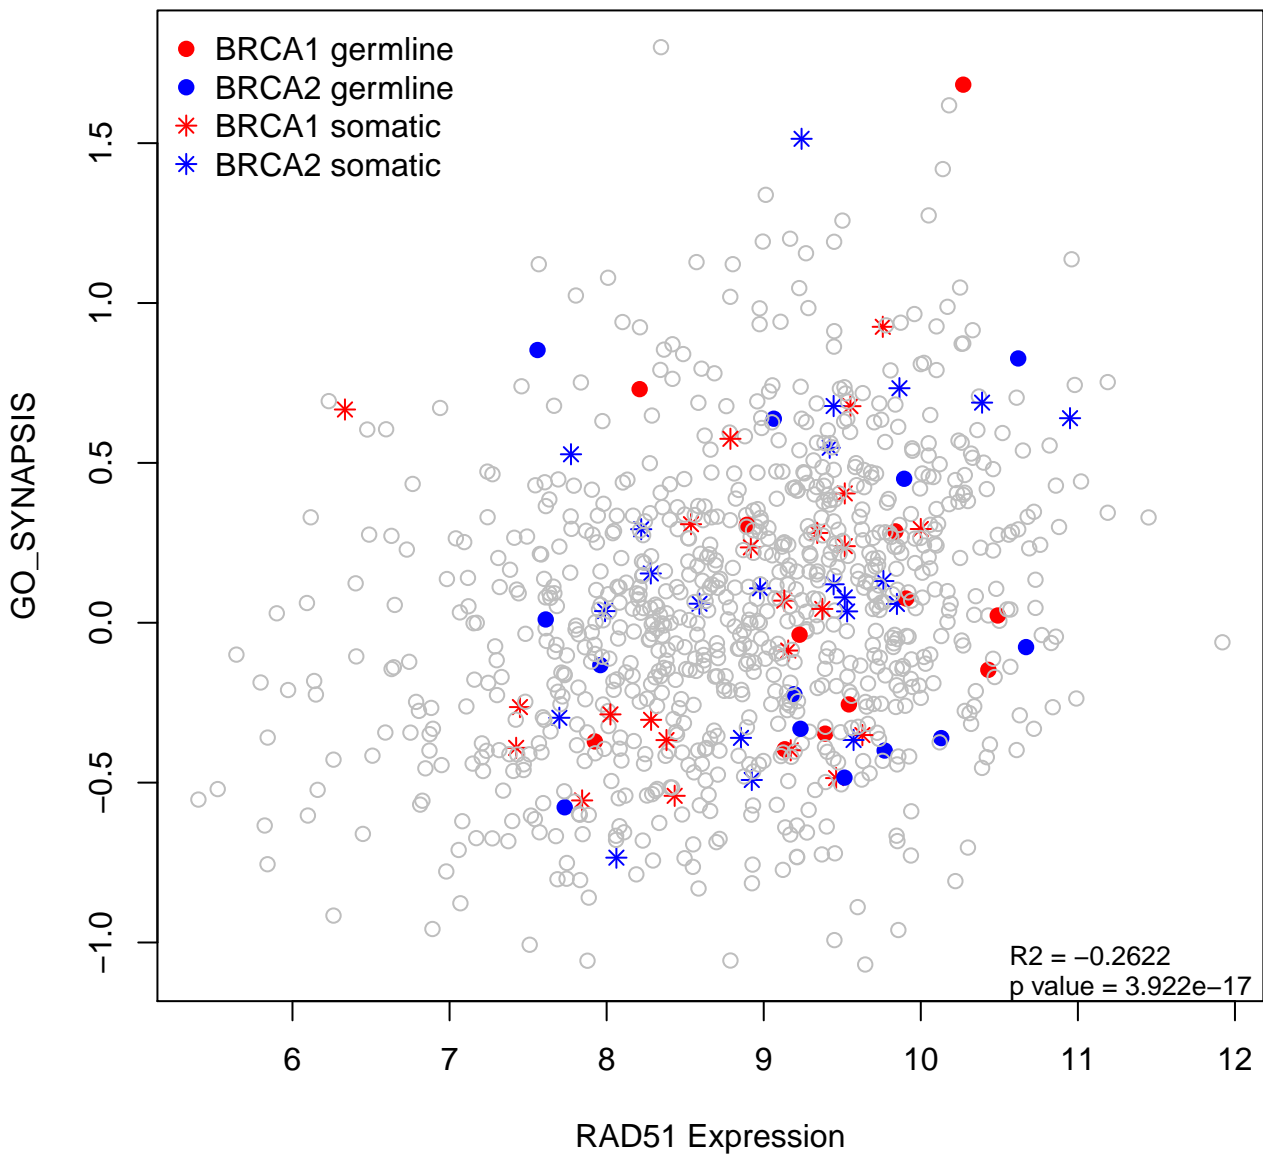

GO\_SYNAPTONEMAL\_COMPLEX\_ORGANIZATION

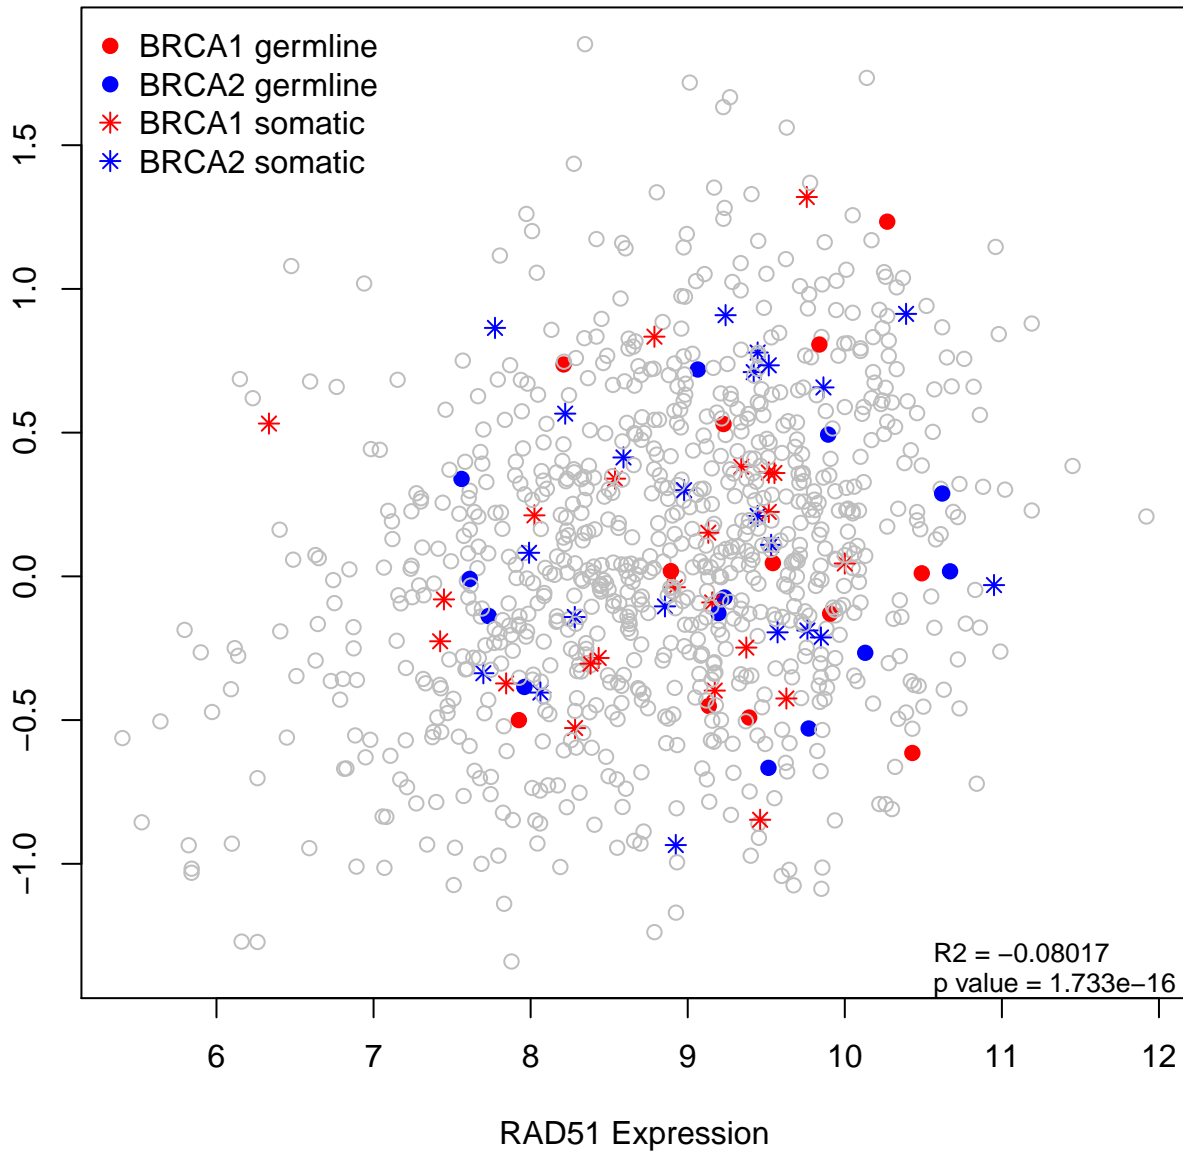

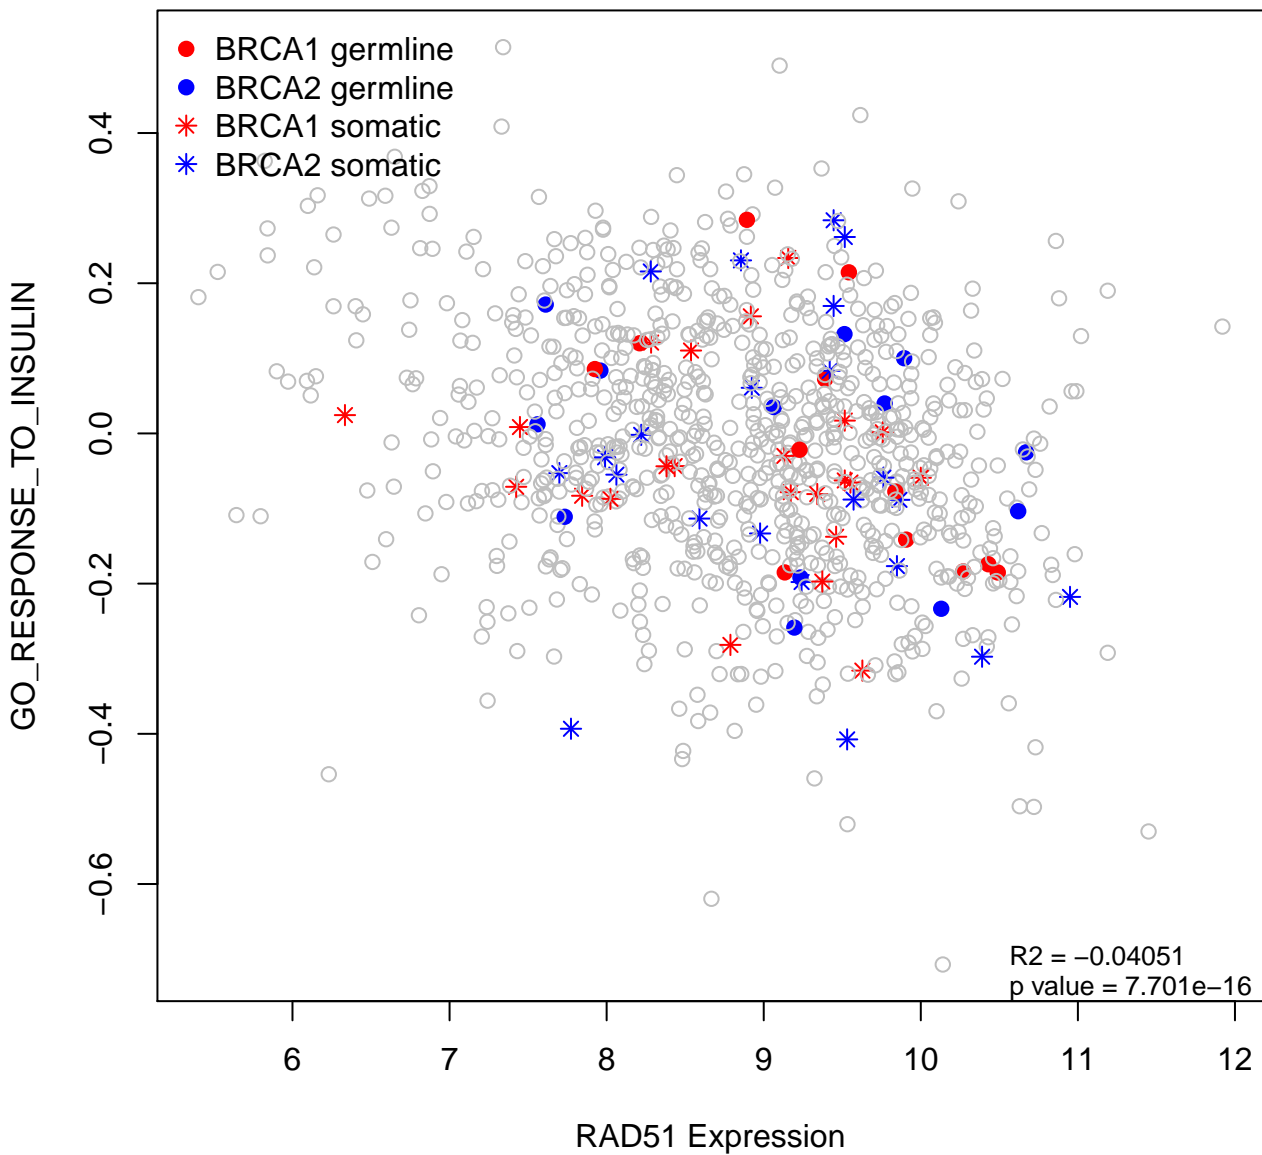

GSE15139\_GMCSF\_TREATED\_VS\_UNTREATED\_NEUTROPHILS\_UP

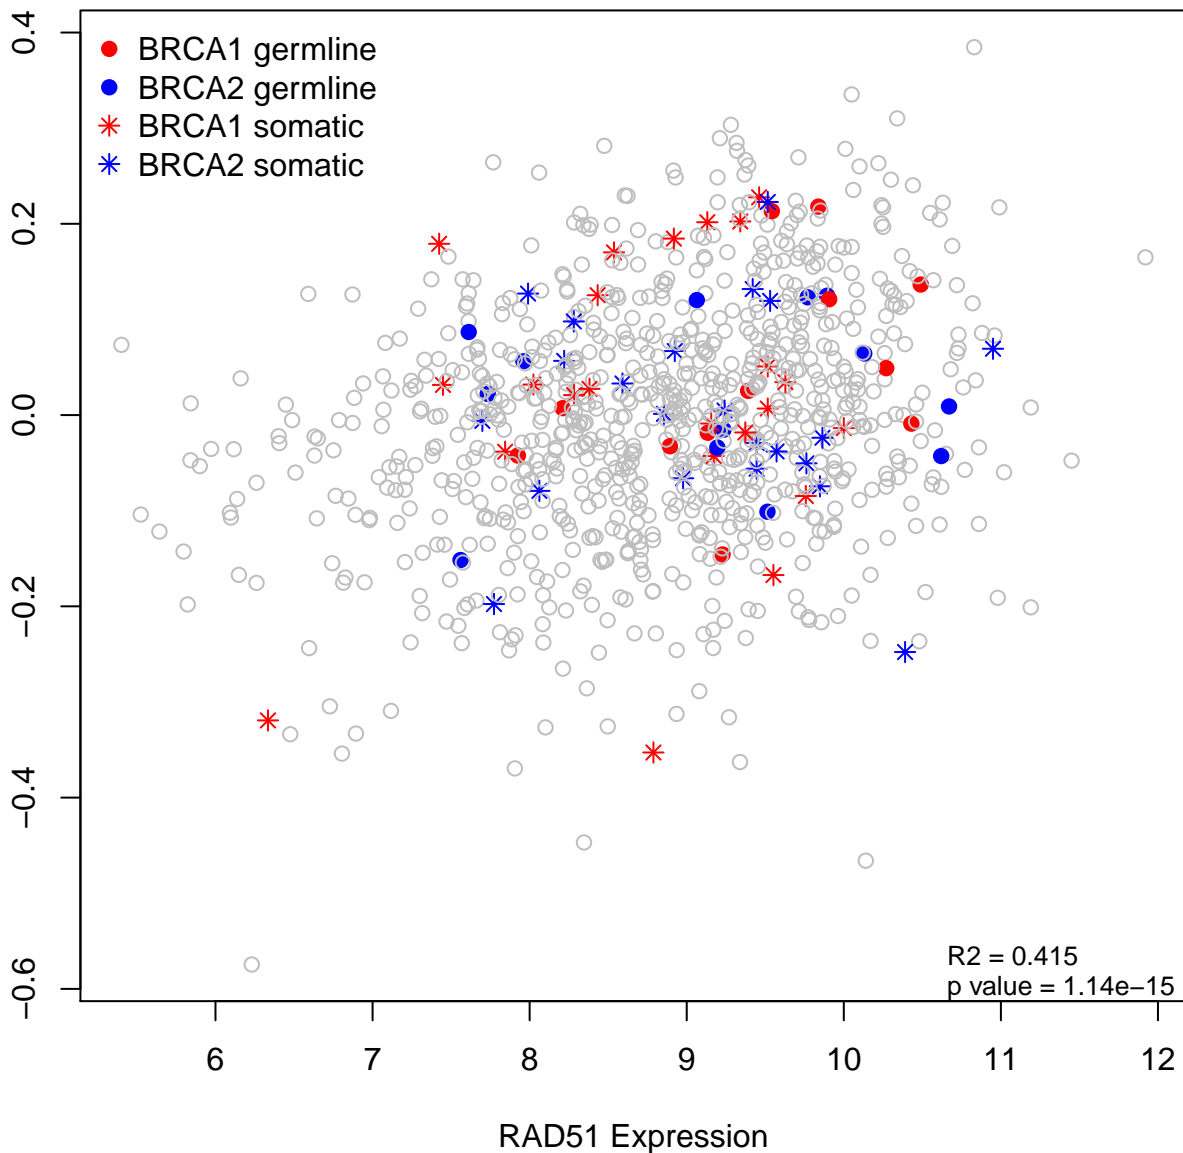



GSE15139\_GMCSF\_TREATED\_VS\_UNTREATED\_NEUTROPHILS\_DN

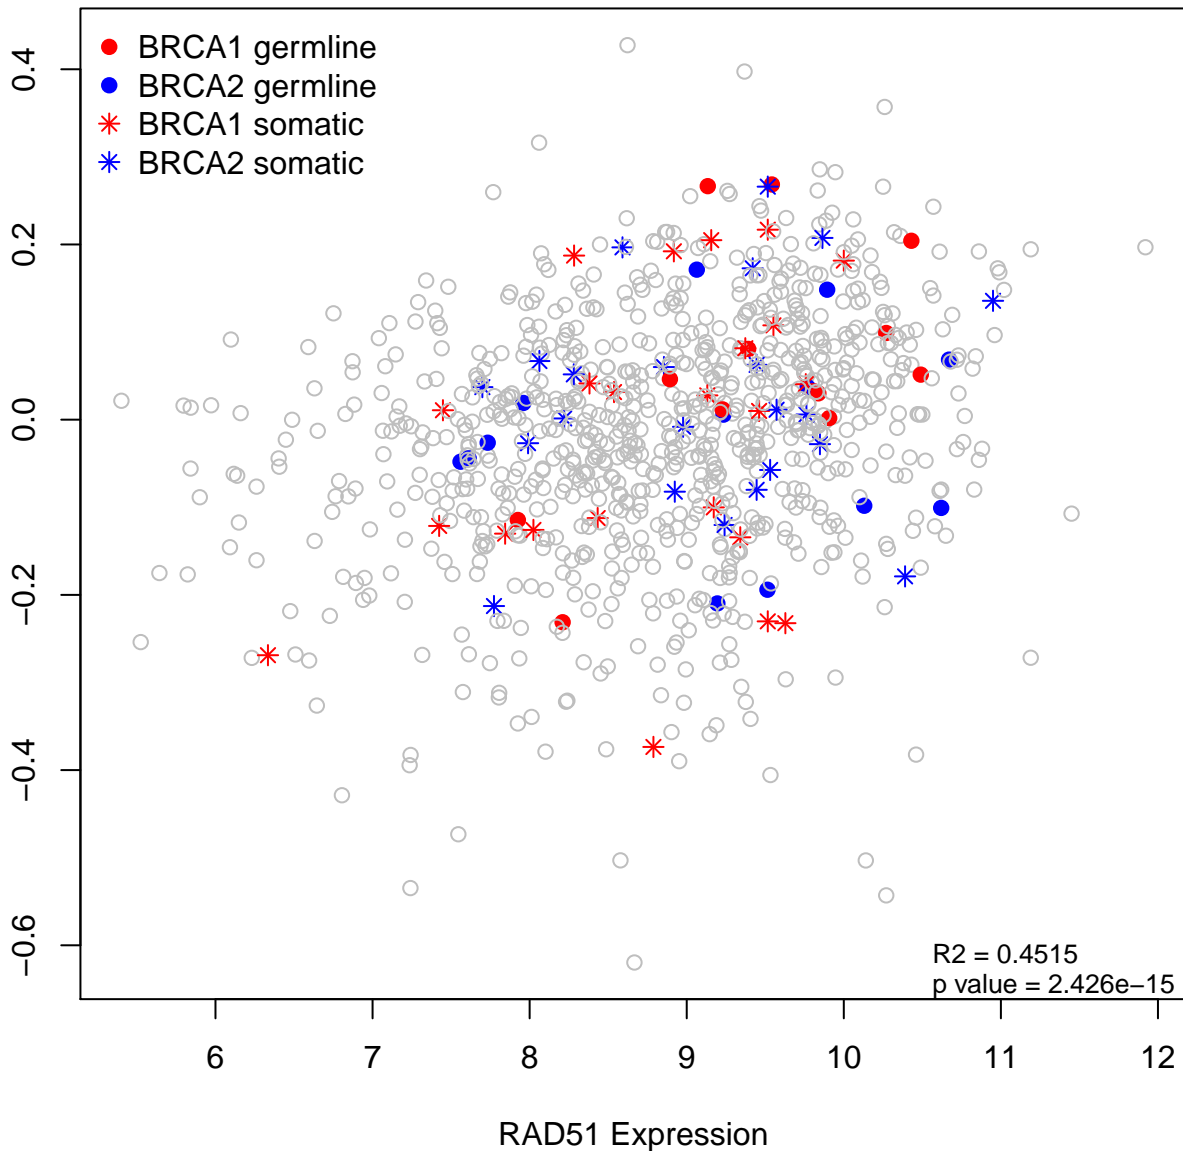

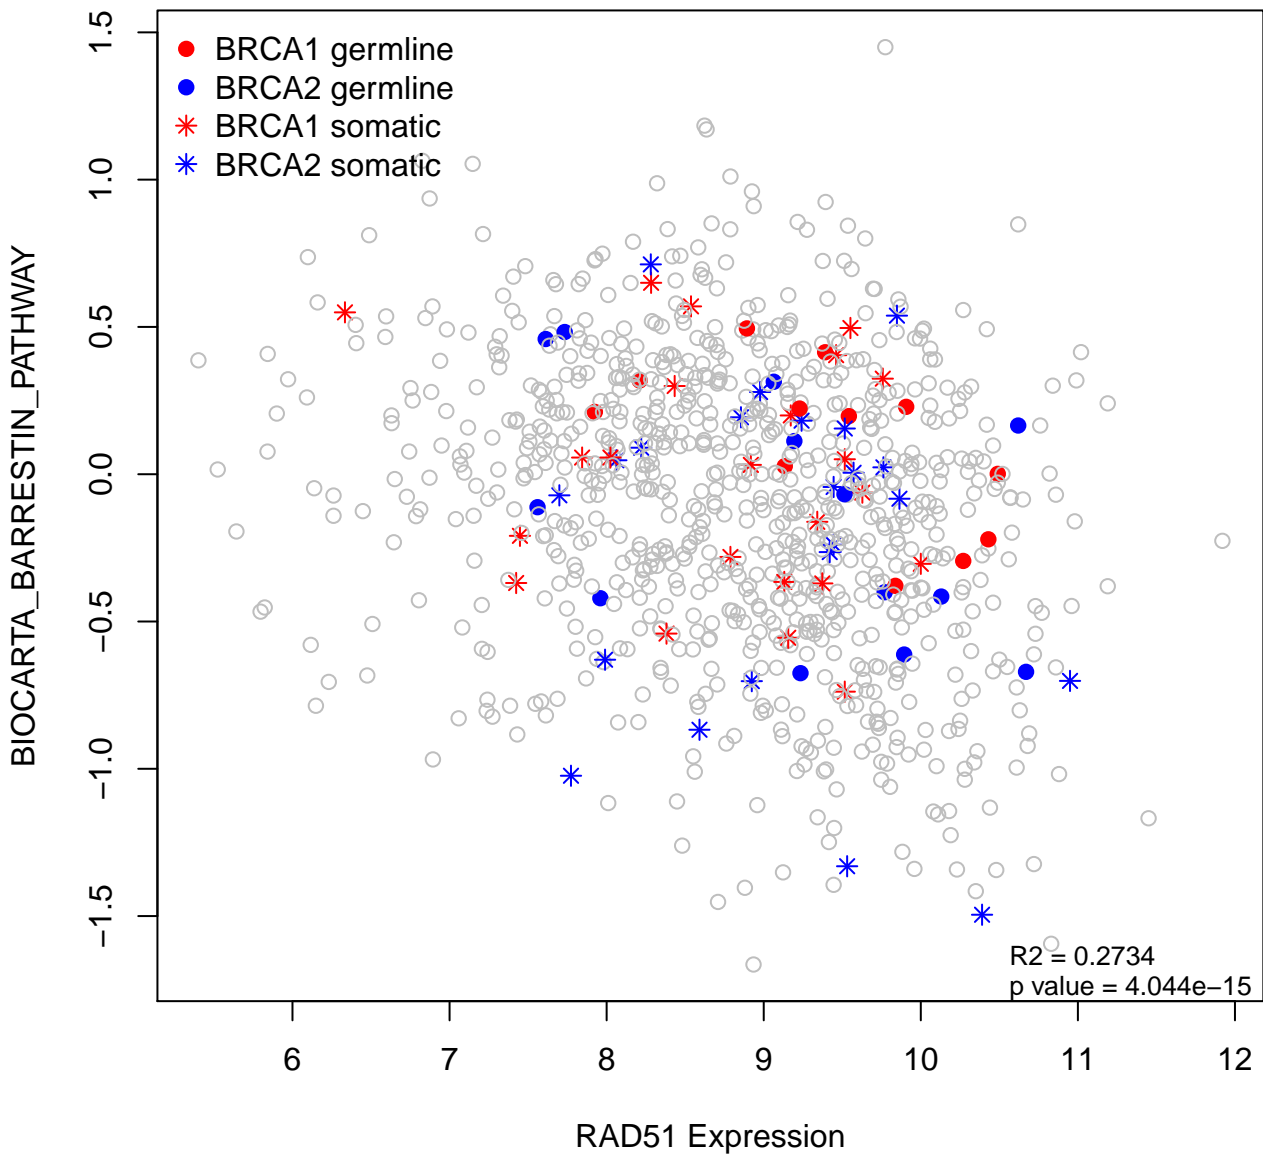

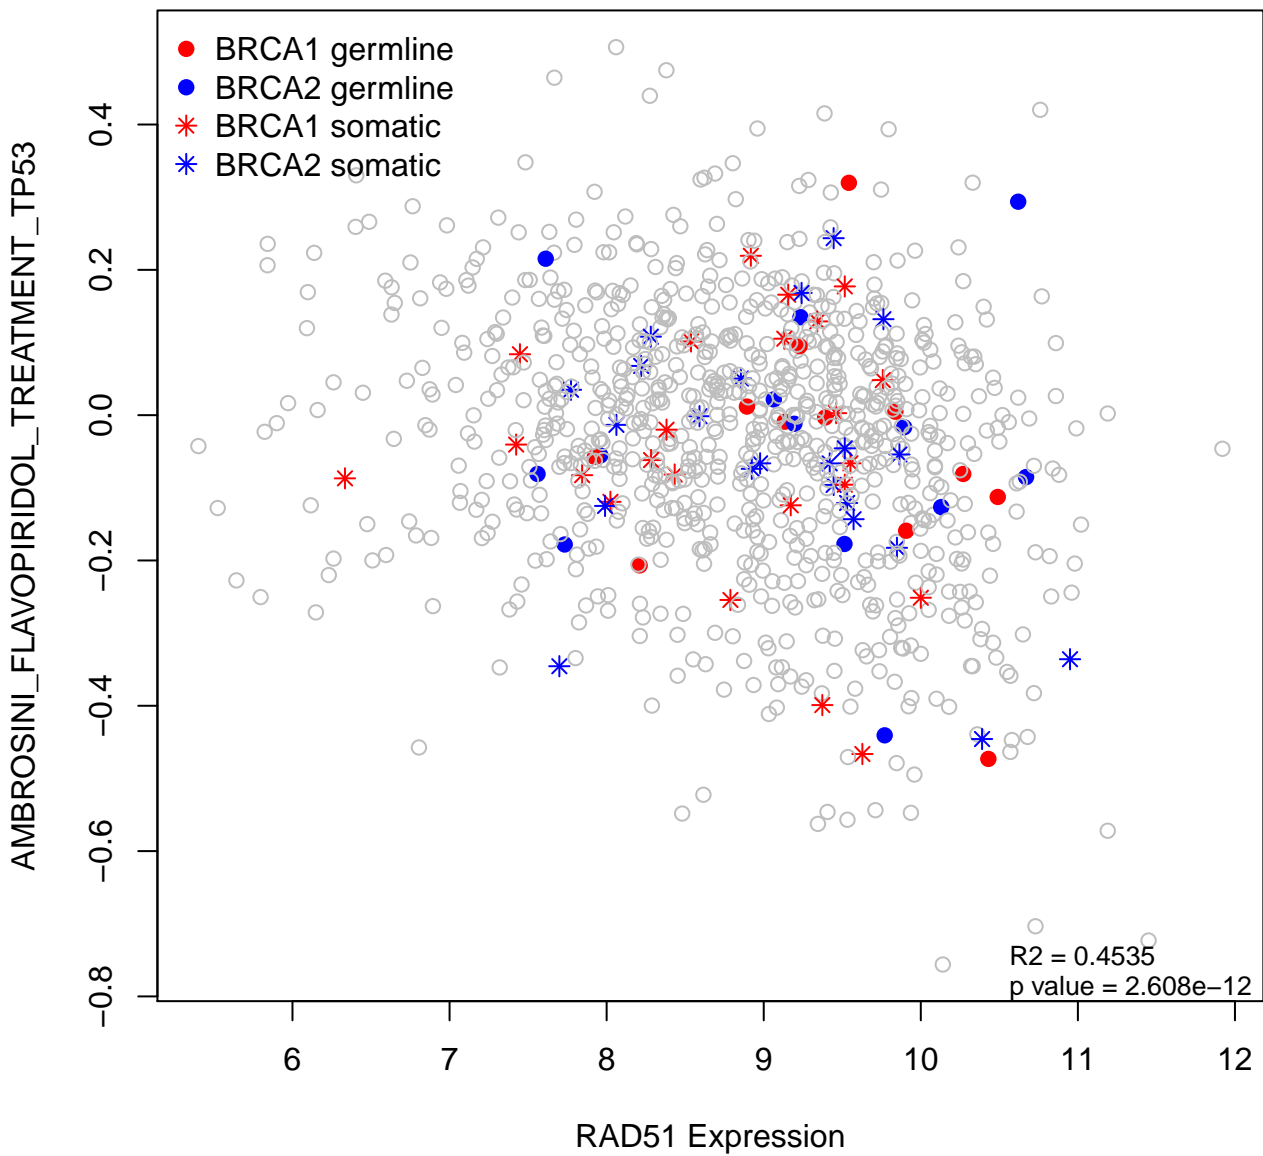

BIOCARTA\_AKAPCENTROSOME\_PATHWAY

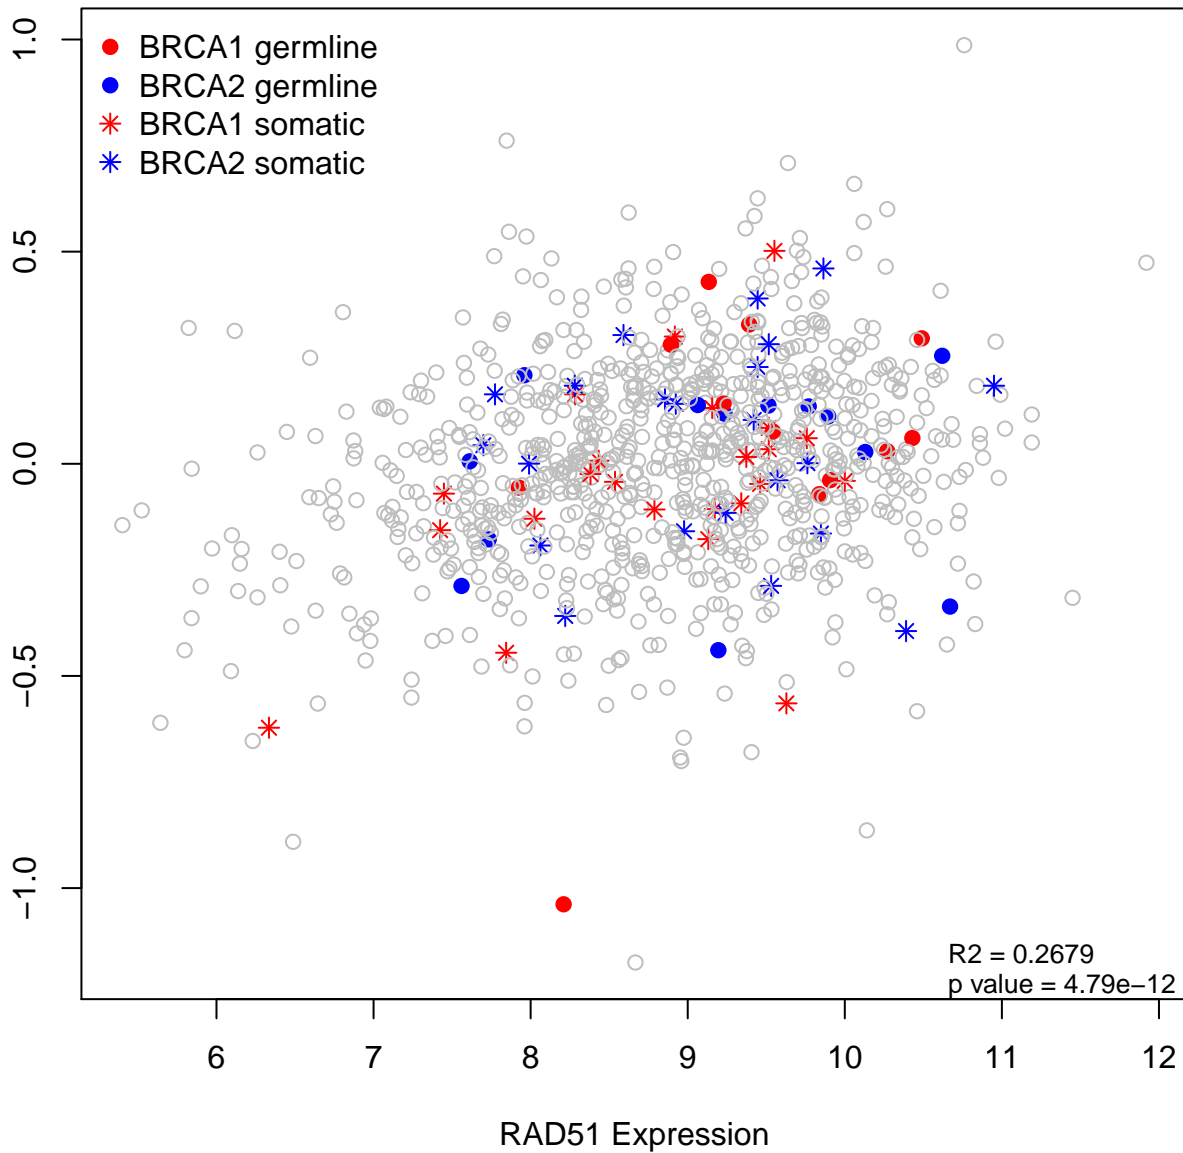

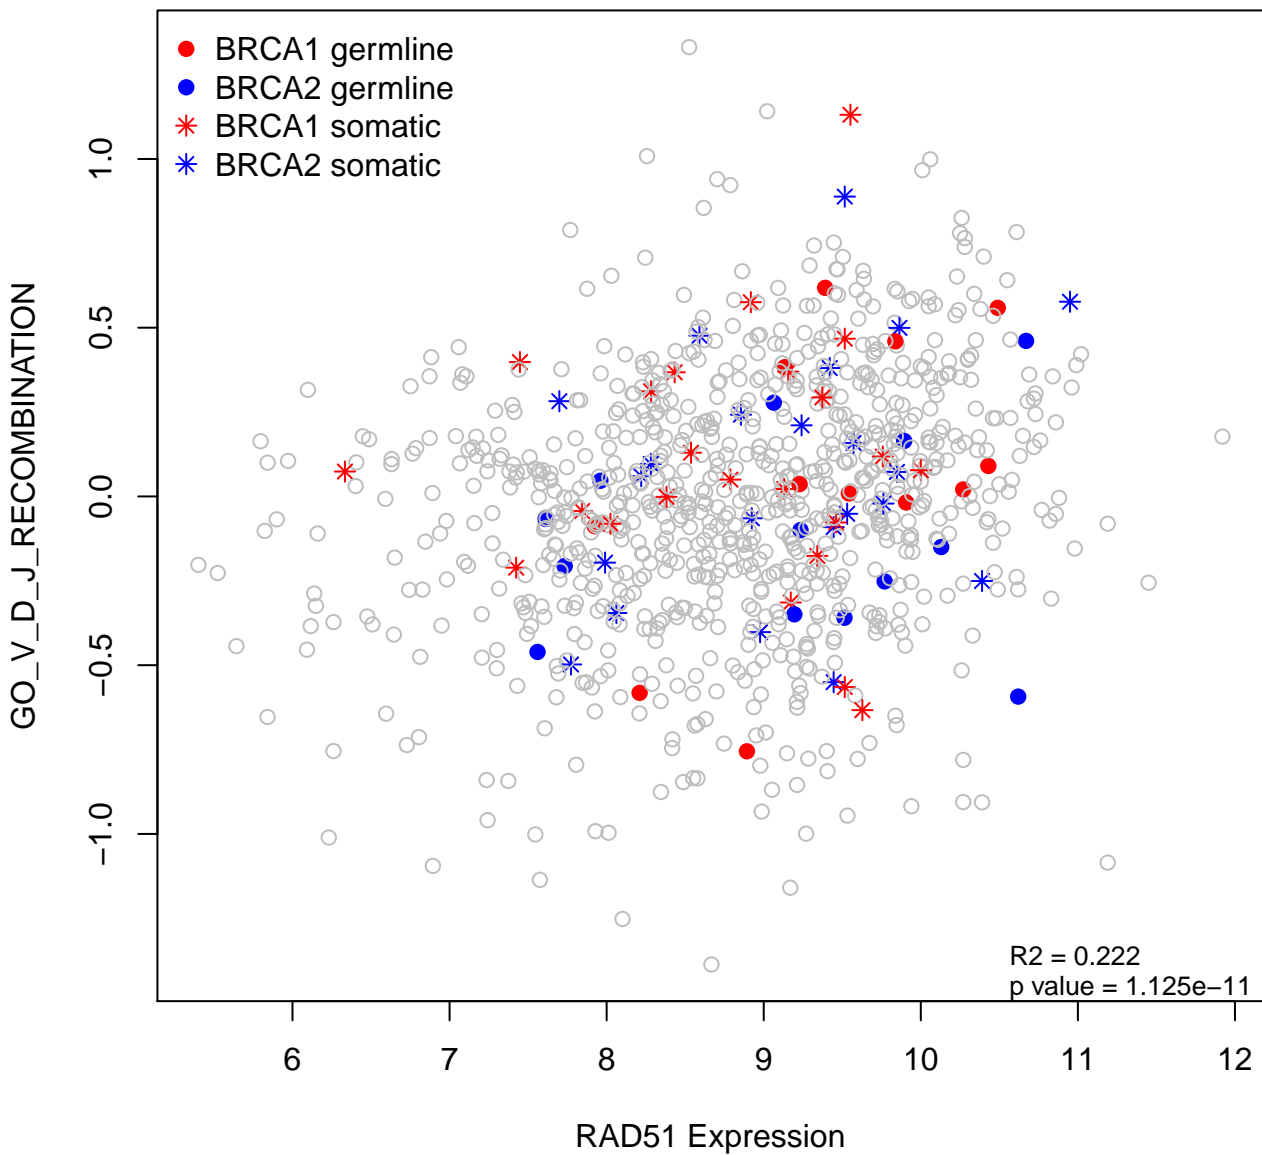

JIANG\_CORE\_DUPLICATION\_GENES

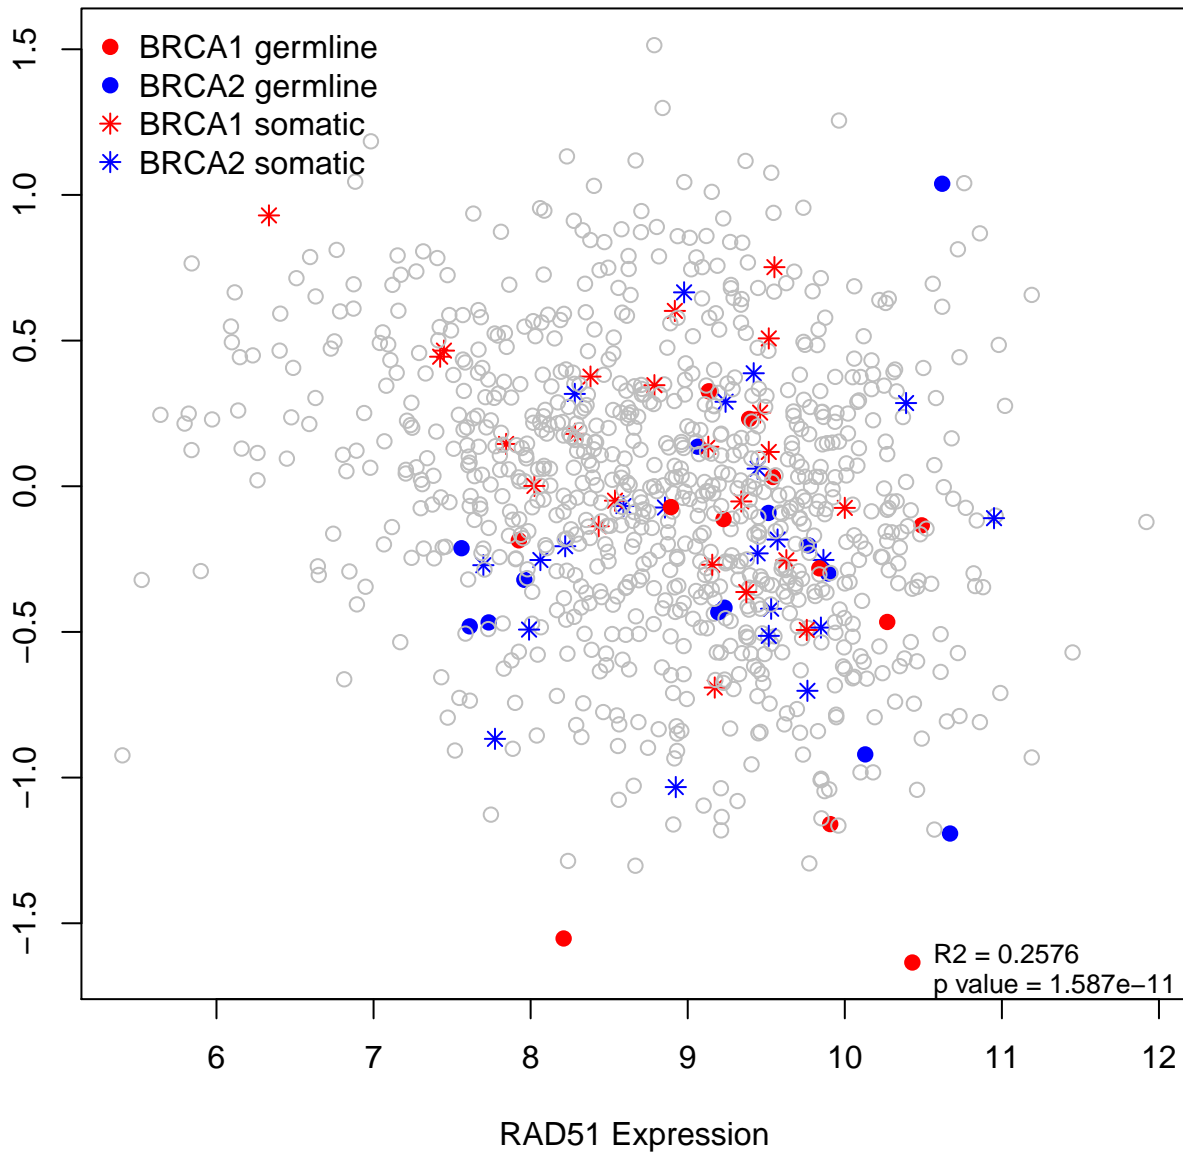

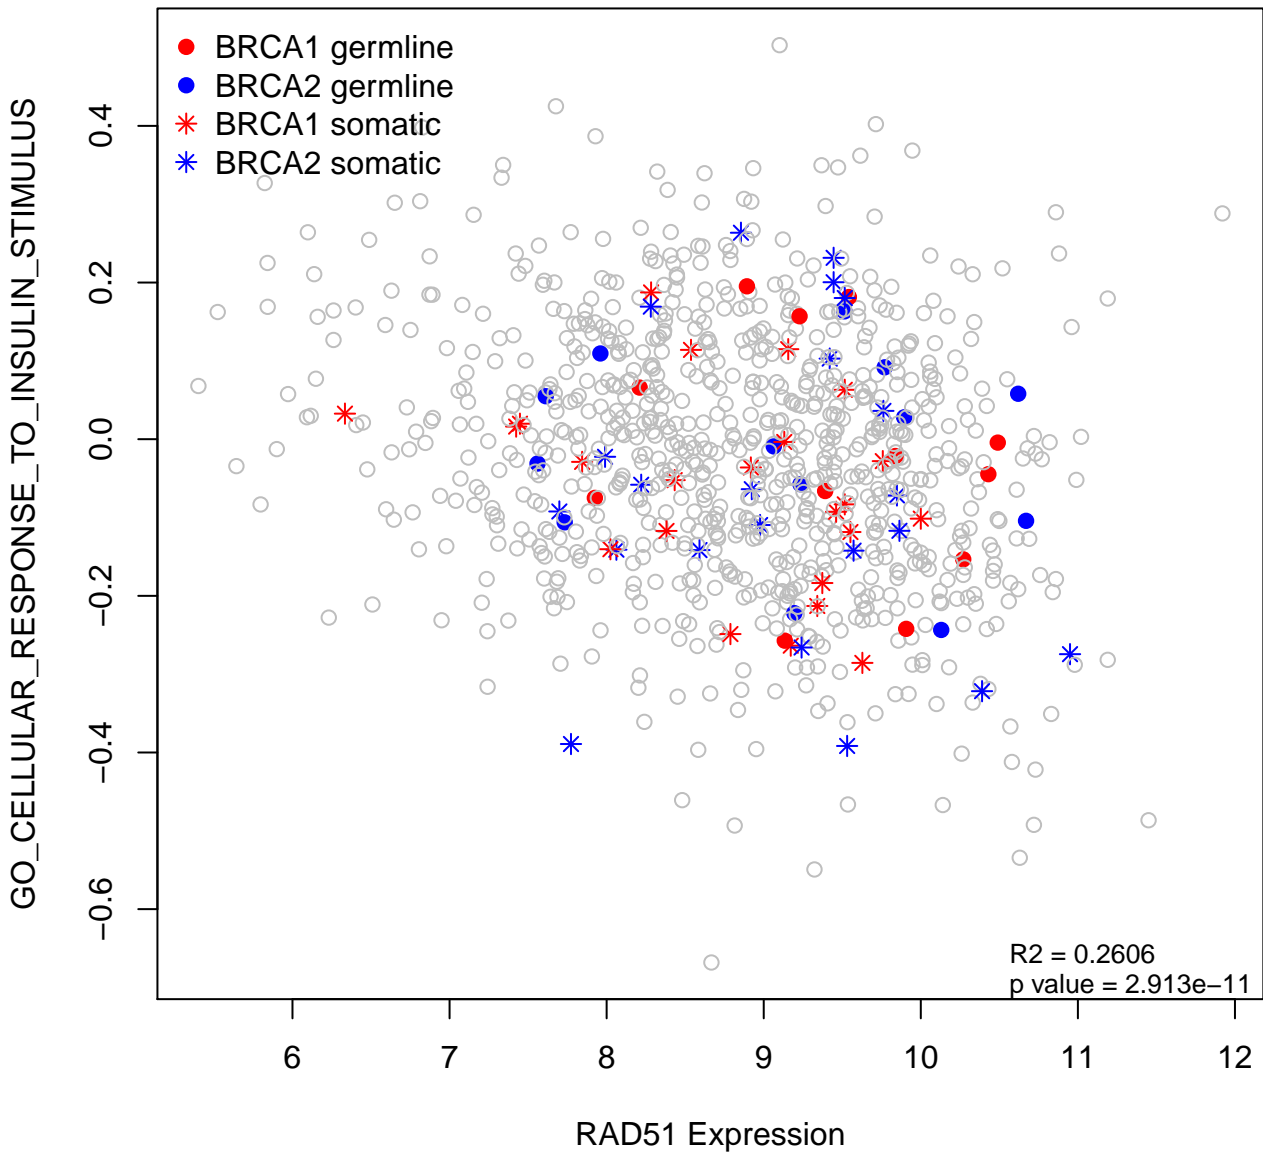

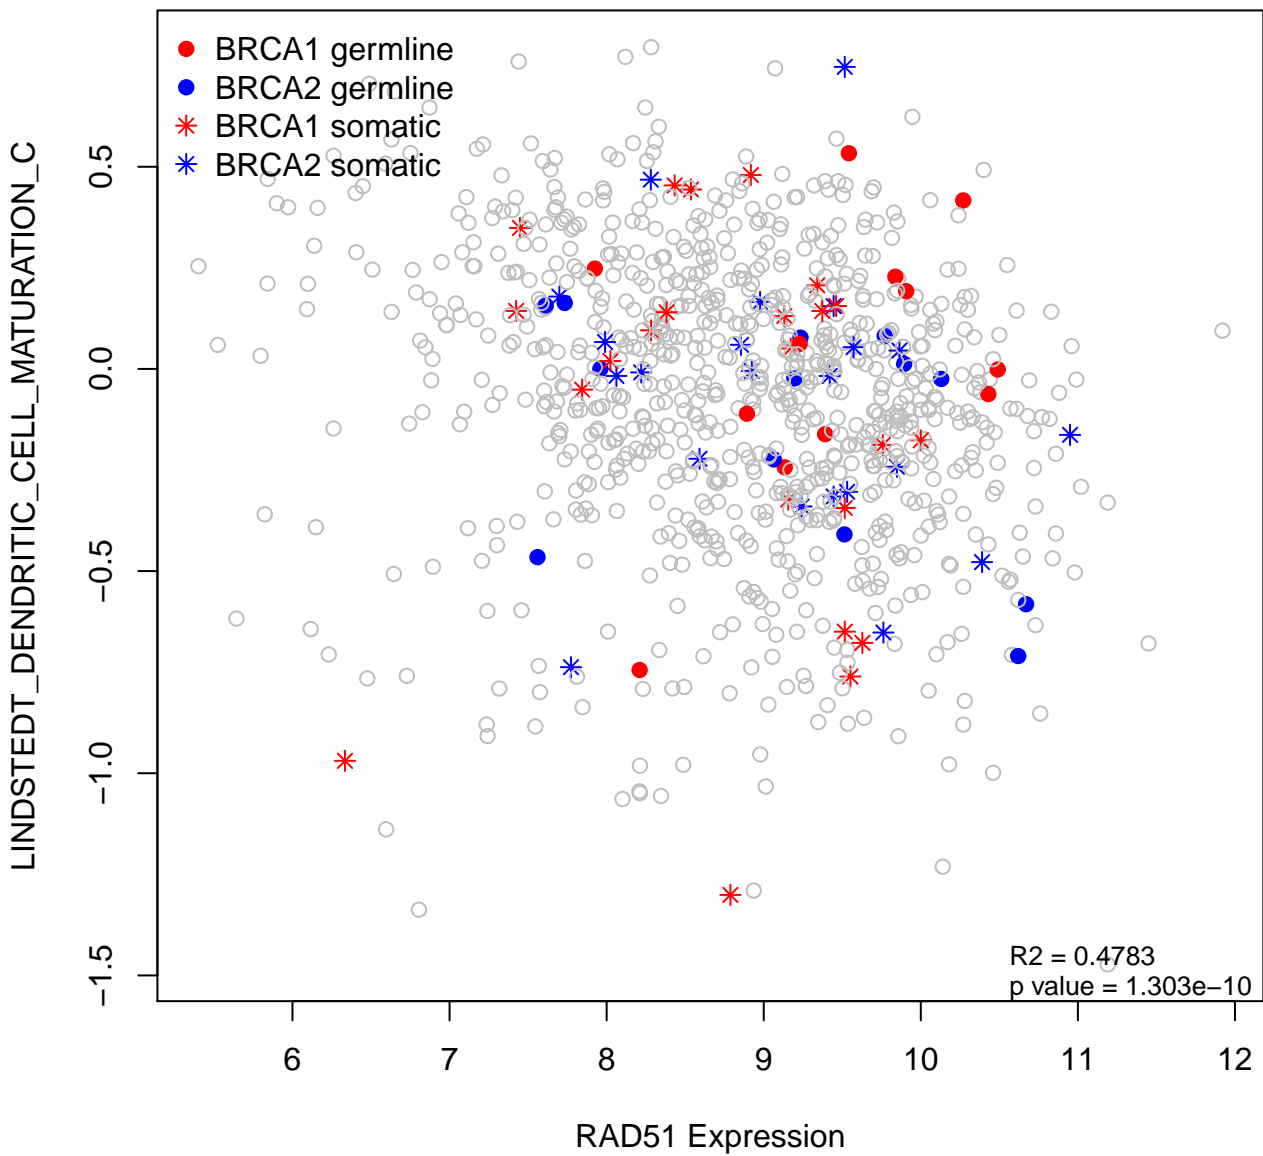



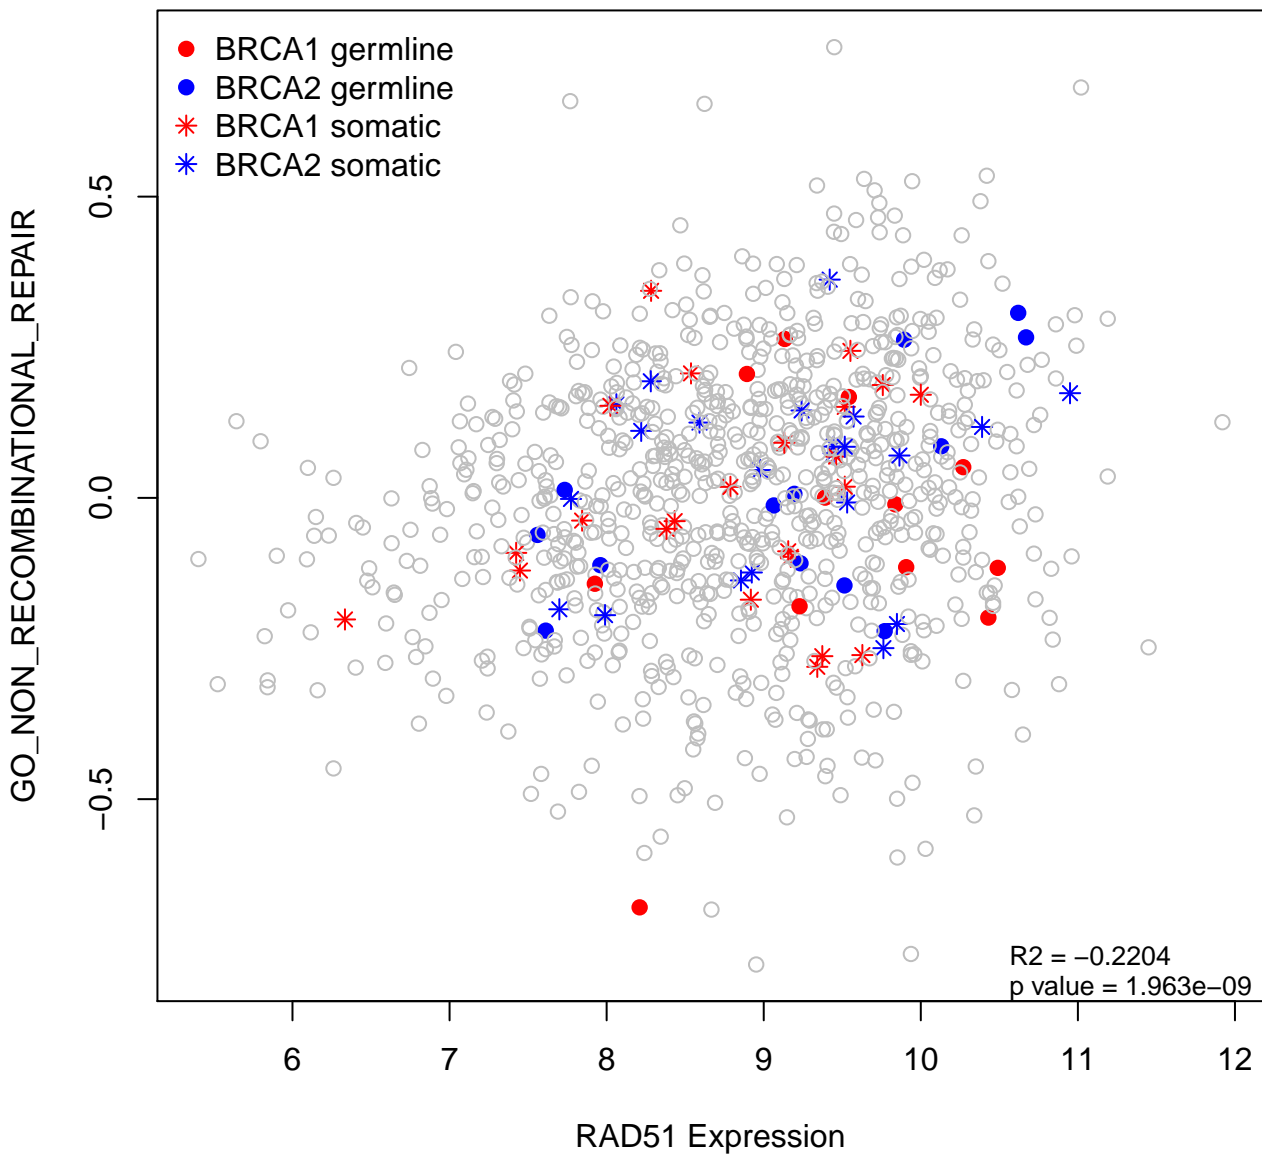

LINDSTEDT\_DENDRITIC\_CELL\_MATURATION\_A

- BRCA1 germline
- BRCA2 germline
- \* BRCA1 somatic
- \* BRCA2 somatic

1

0

-1

6

7

8

9

10

11

12

RAD51 Expression

$R^2 = 0.7583$

$p \text{ value} = 1.925e-06$

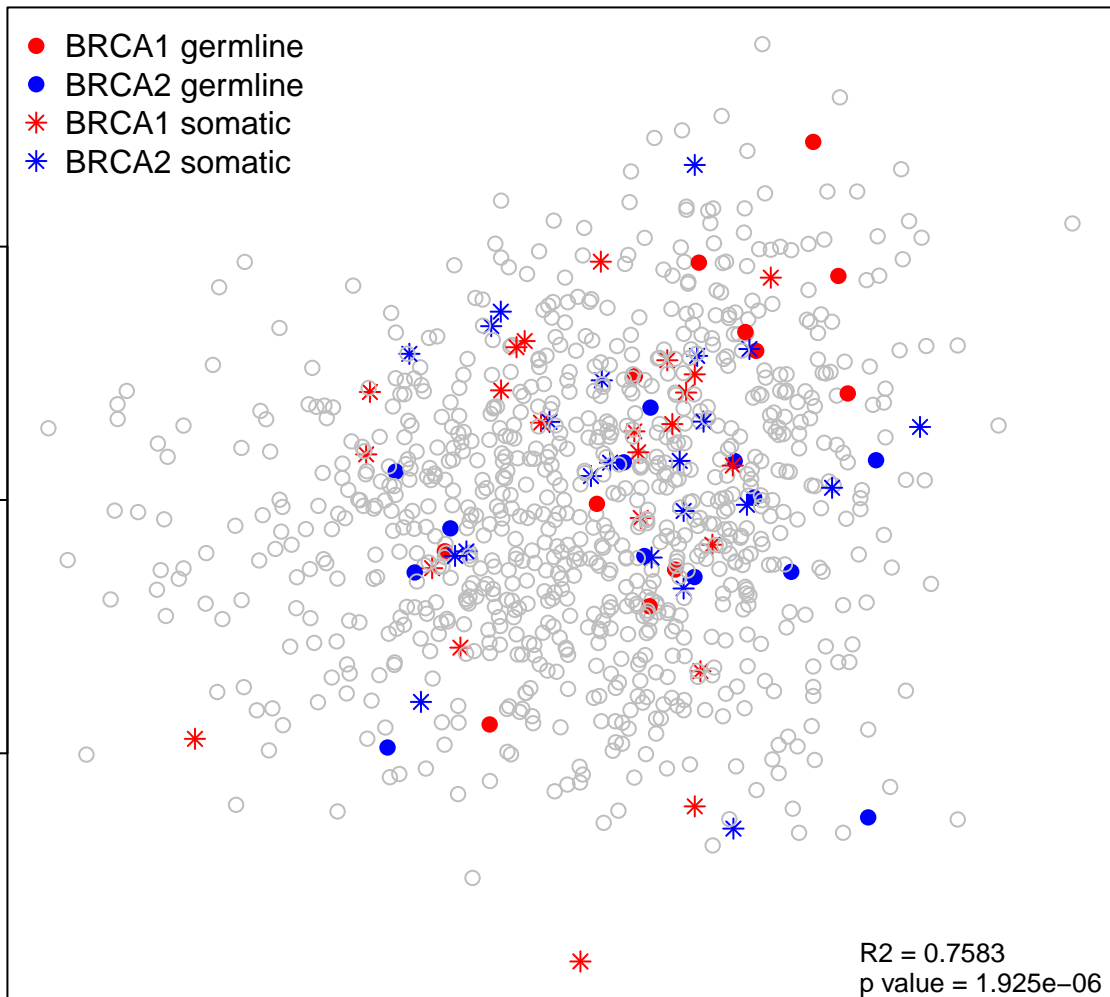

BALLIF\_DEVELOPMENTAL\_DISABILITY\_P16\_P12\_DELETION

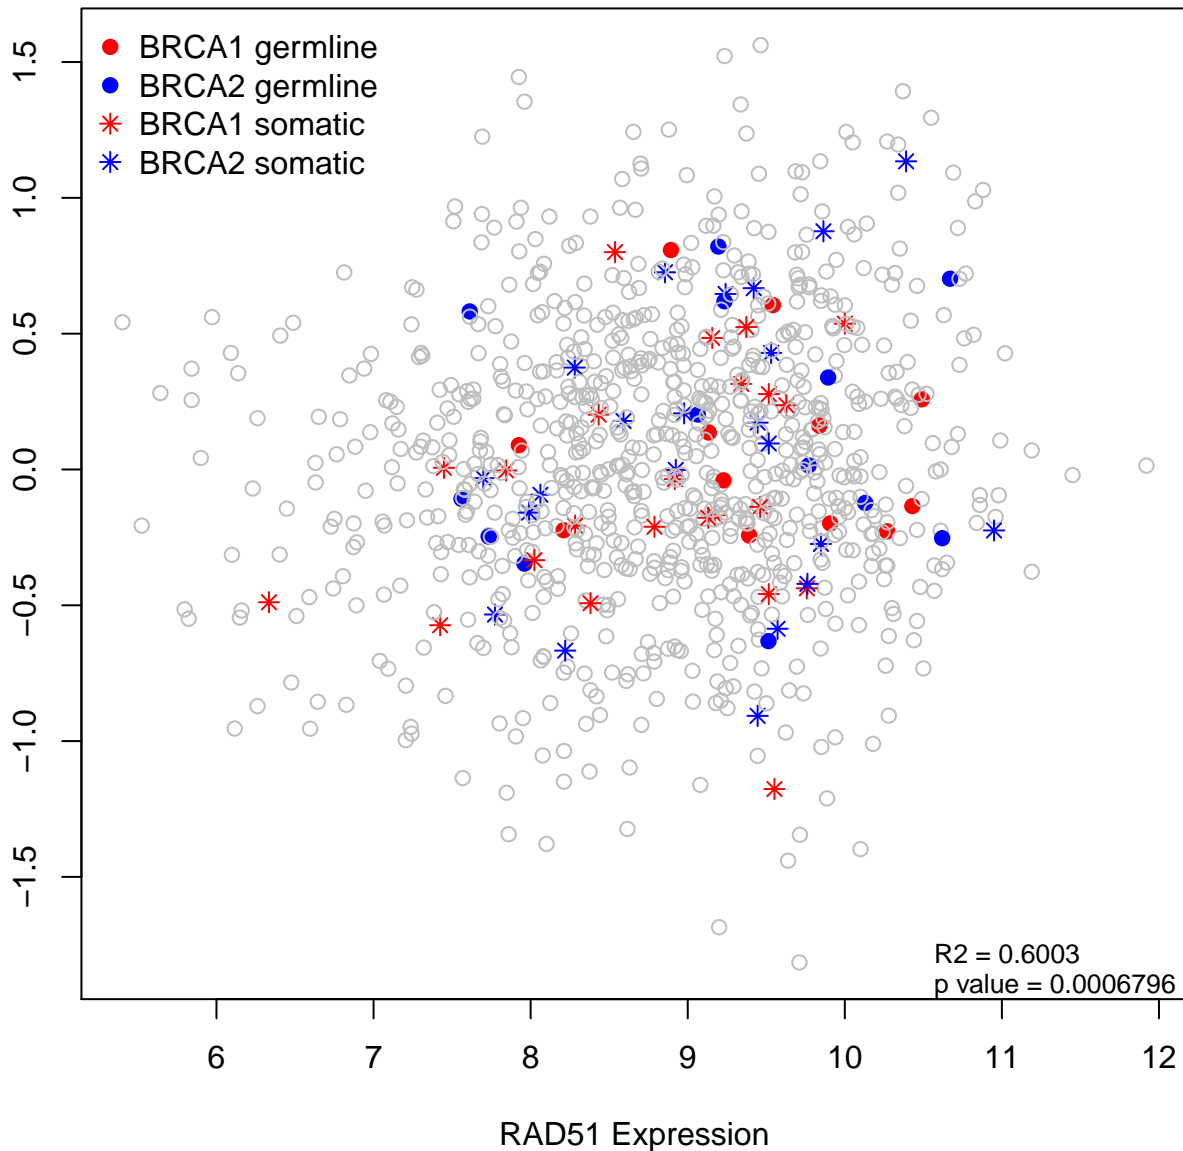

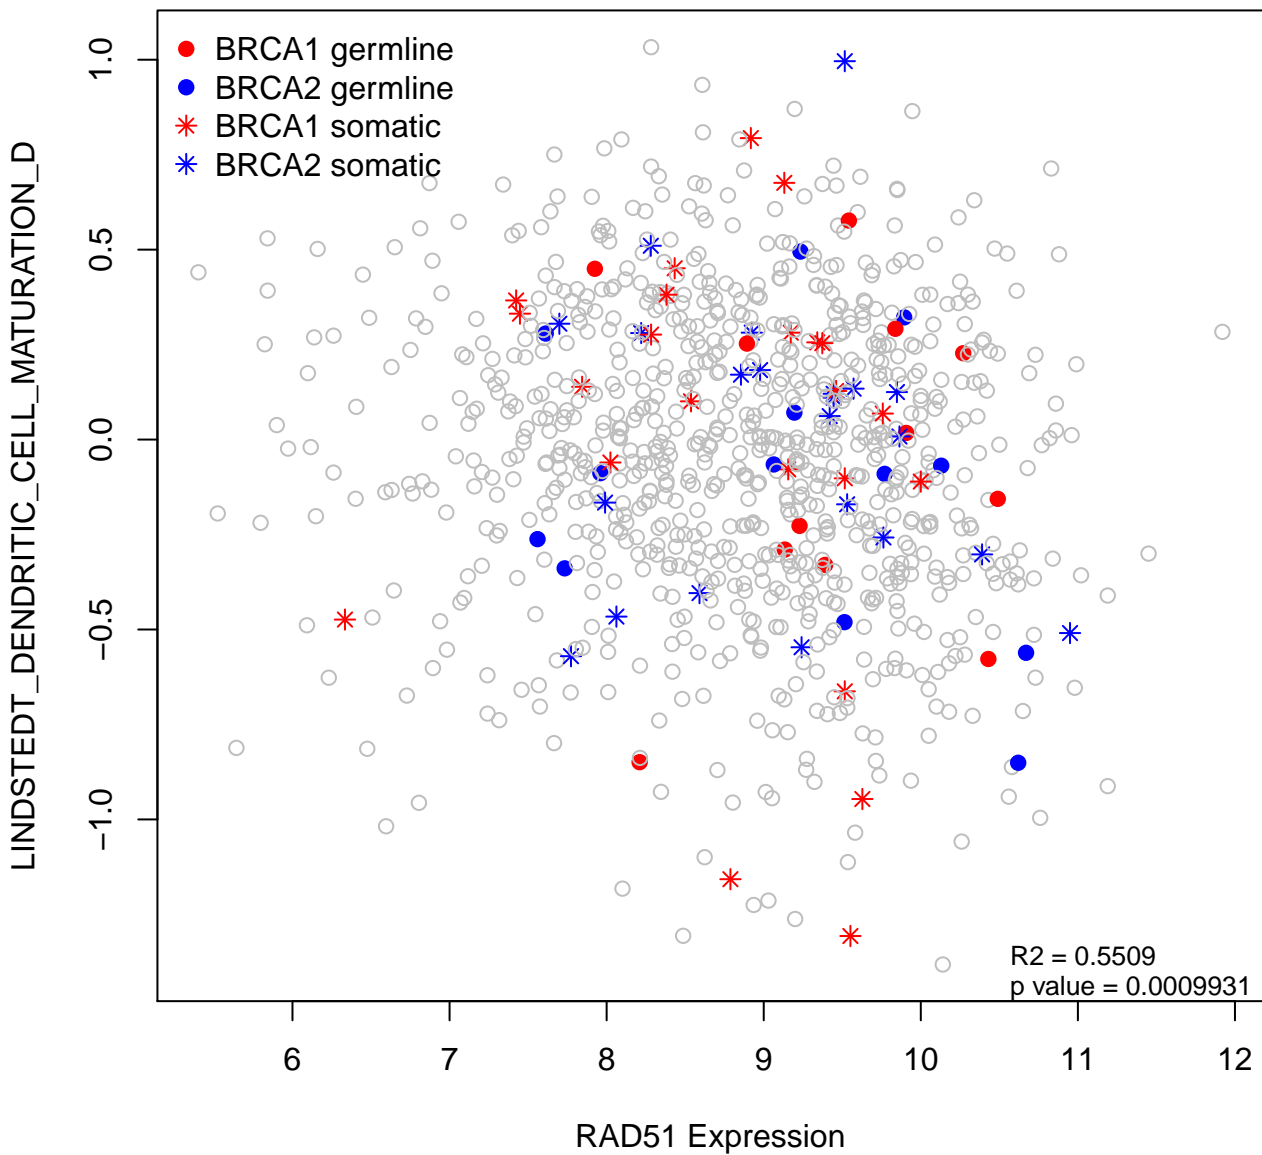

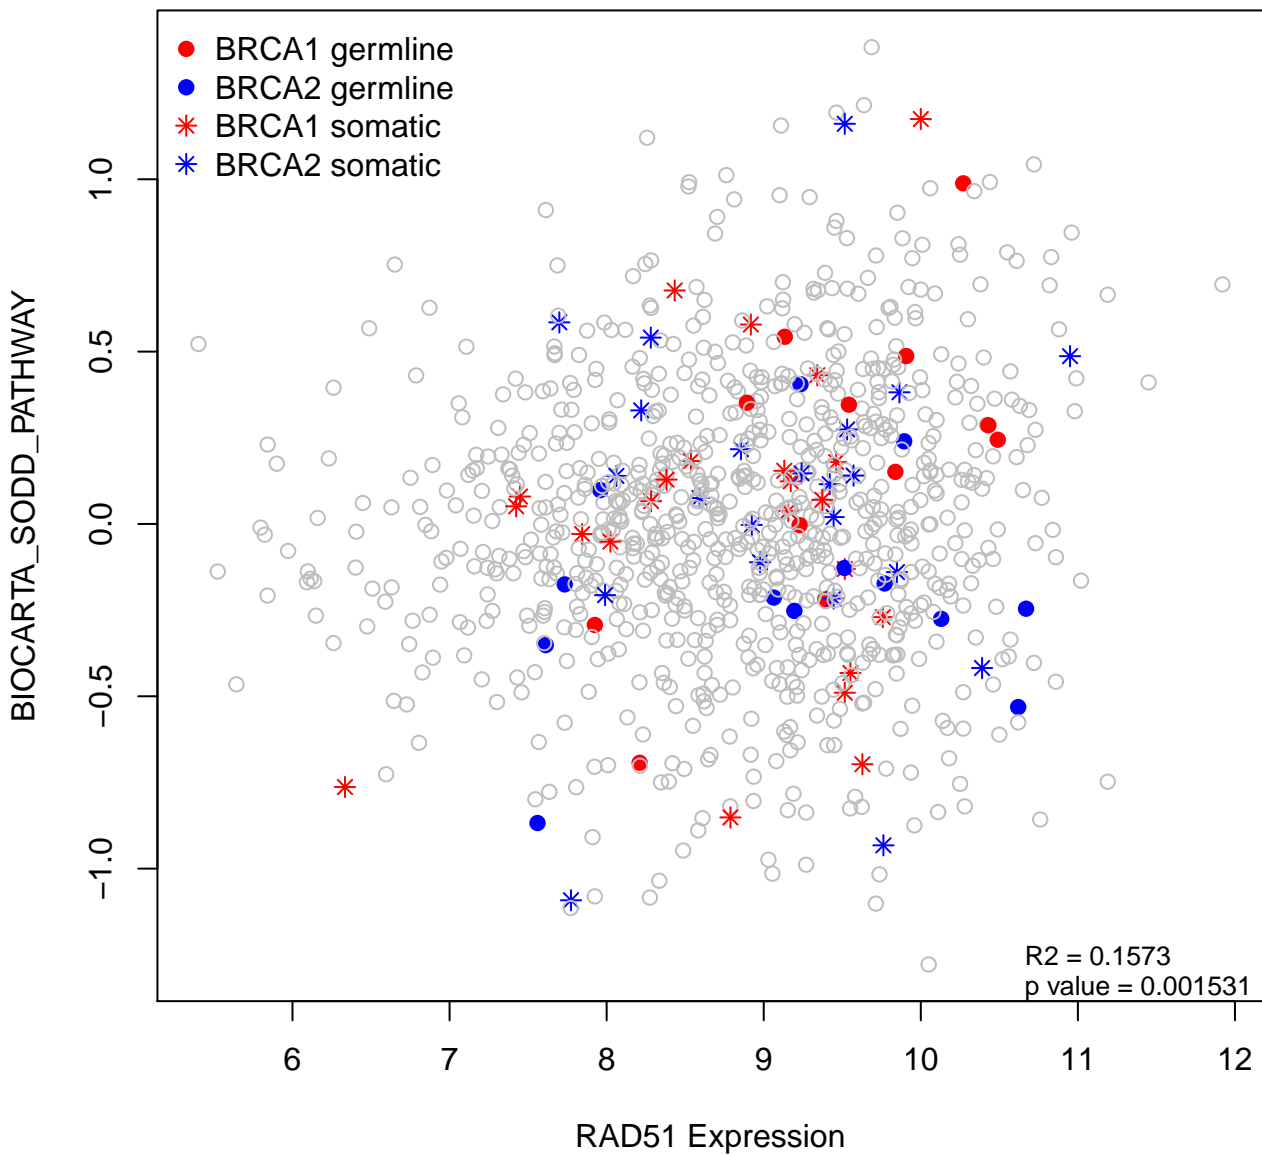

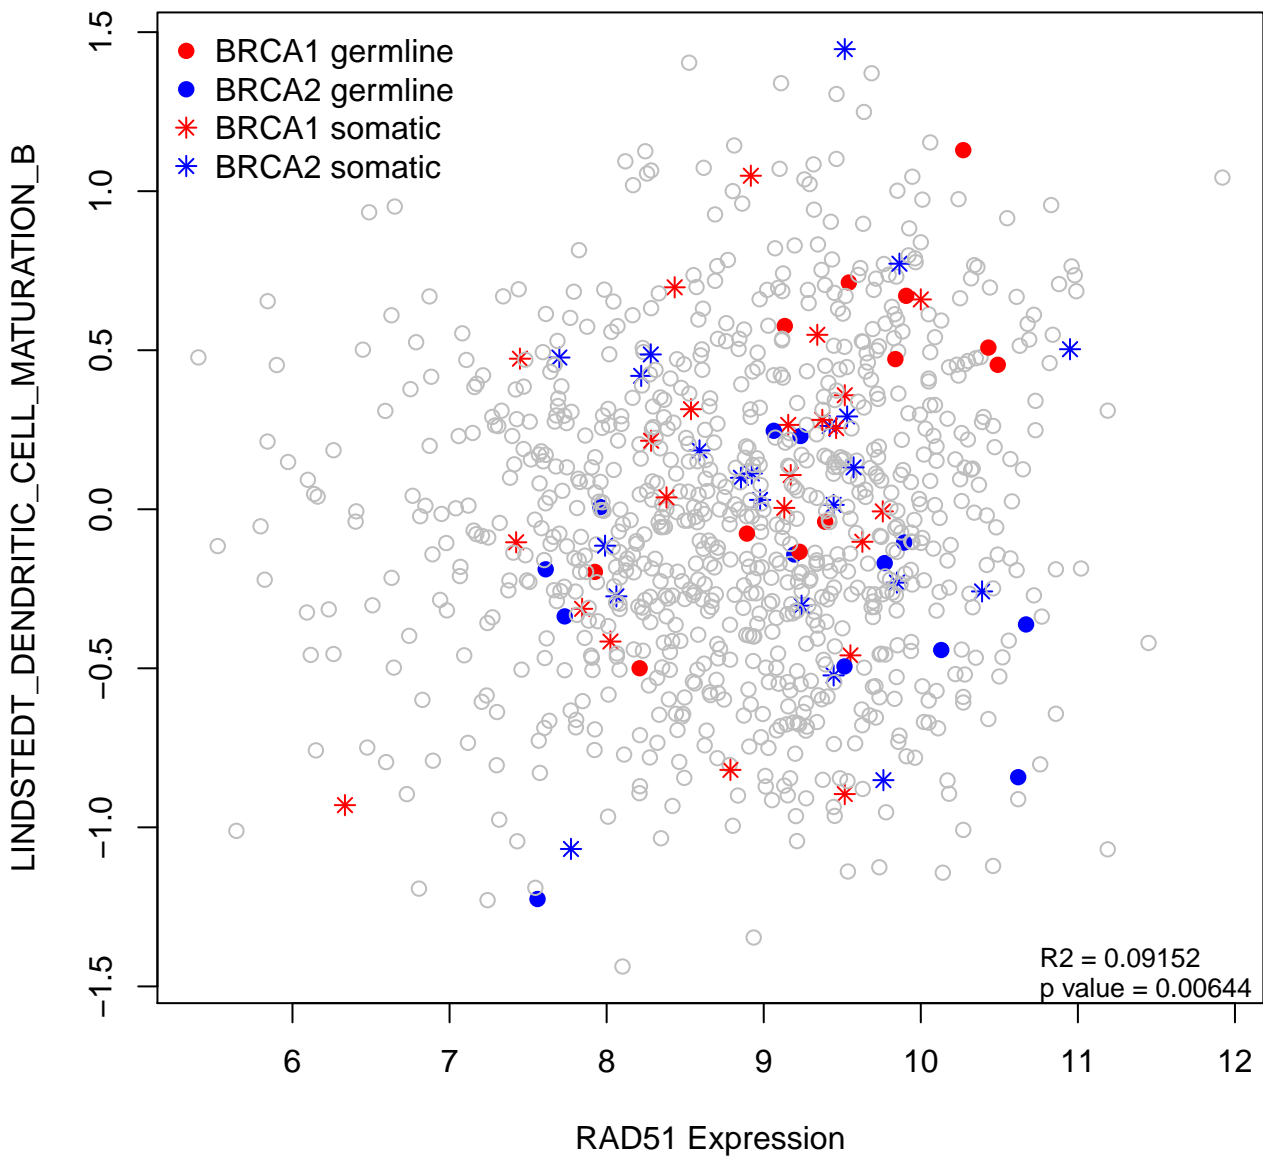

E\_LOCALIZATION\_TO\_NUCLEAR\_ENVELOPE\_INVOLVED\_IN\_HOMOLOGOUS\_CHROMOS

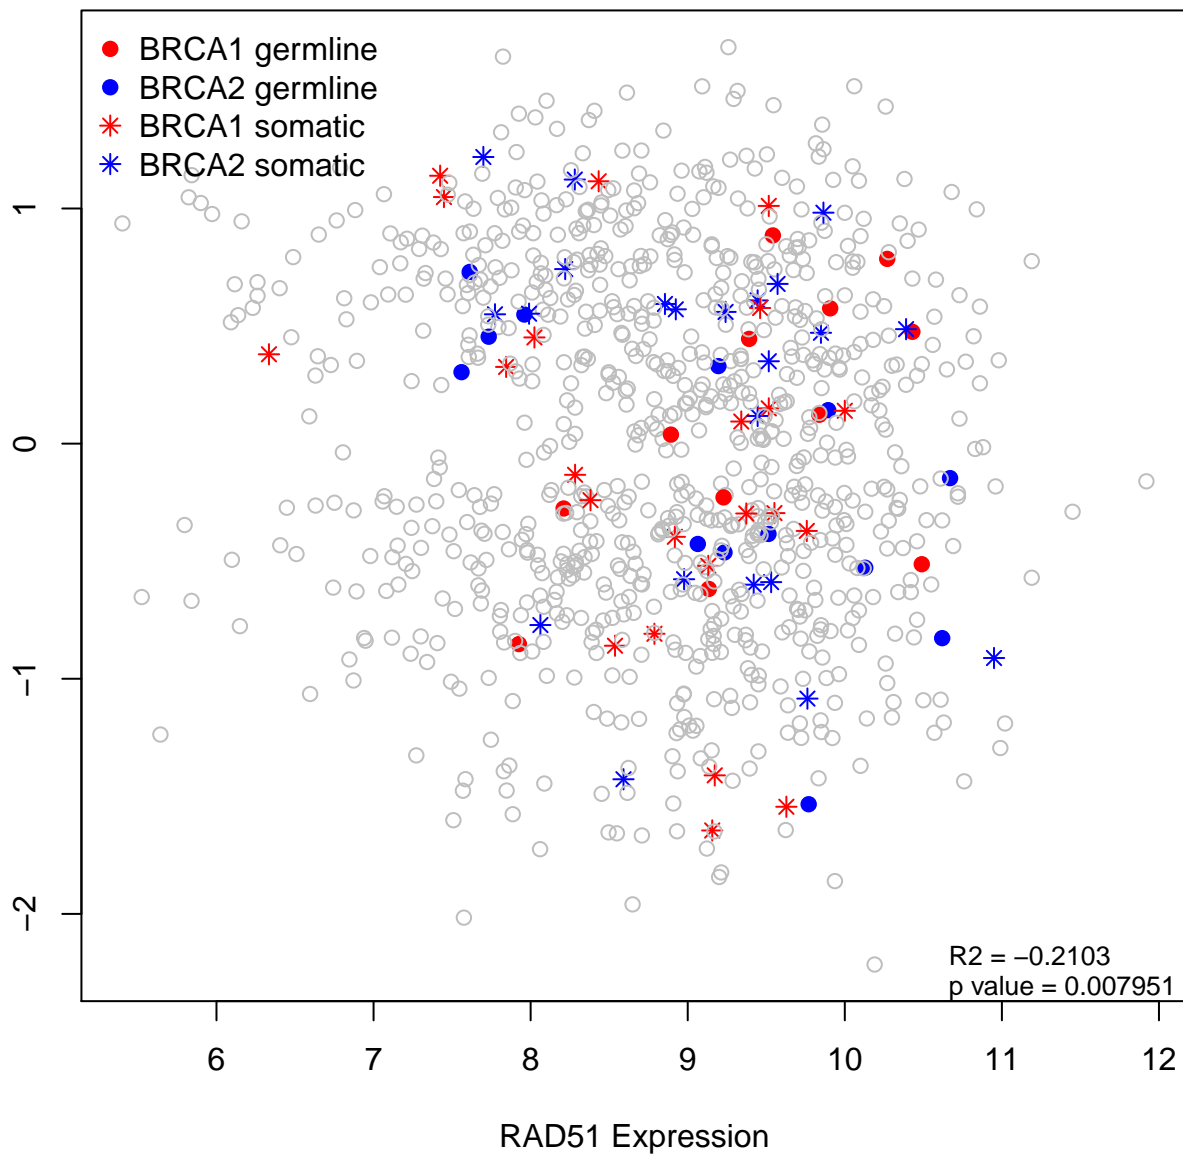

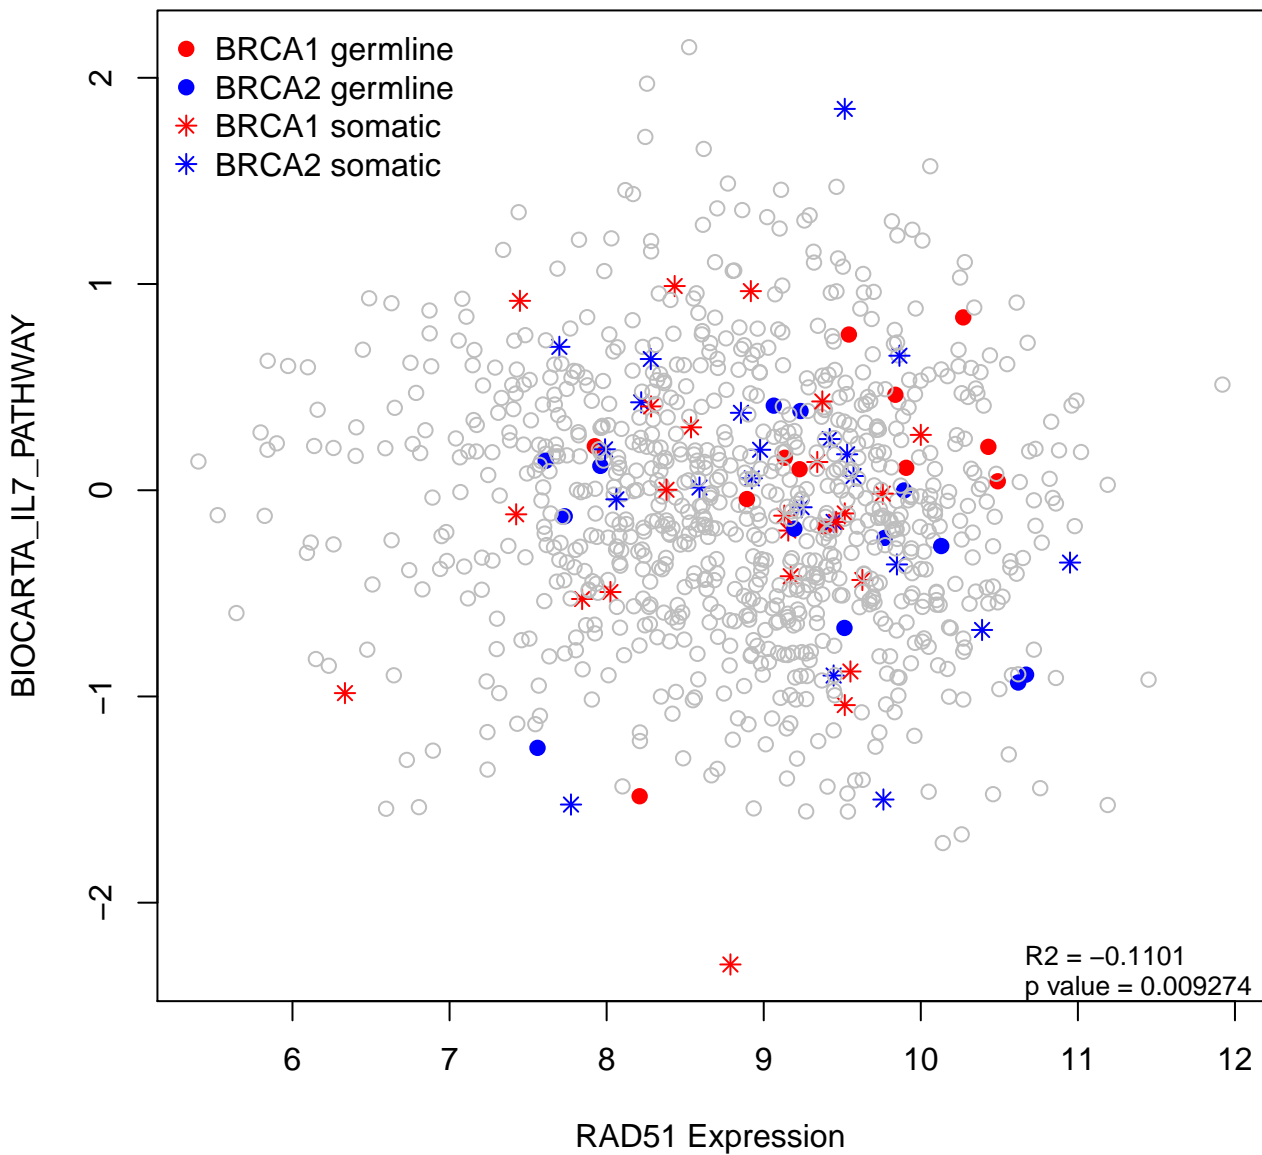



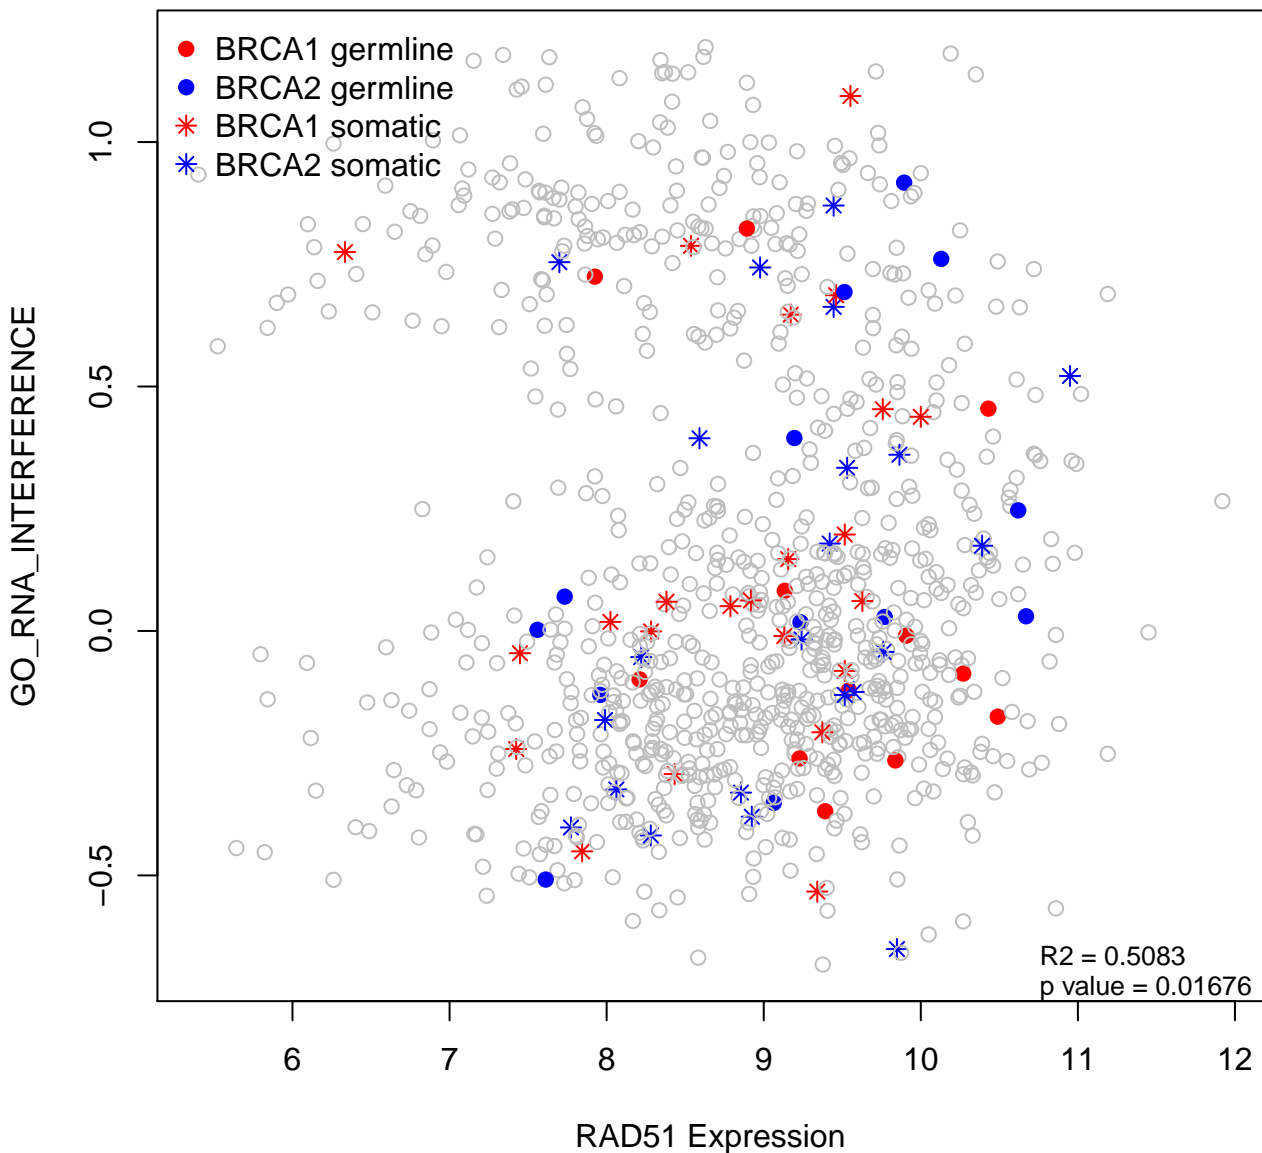

Karginova\_ABT888\_MDAMB436\_Down

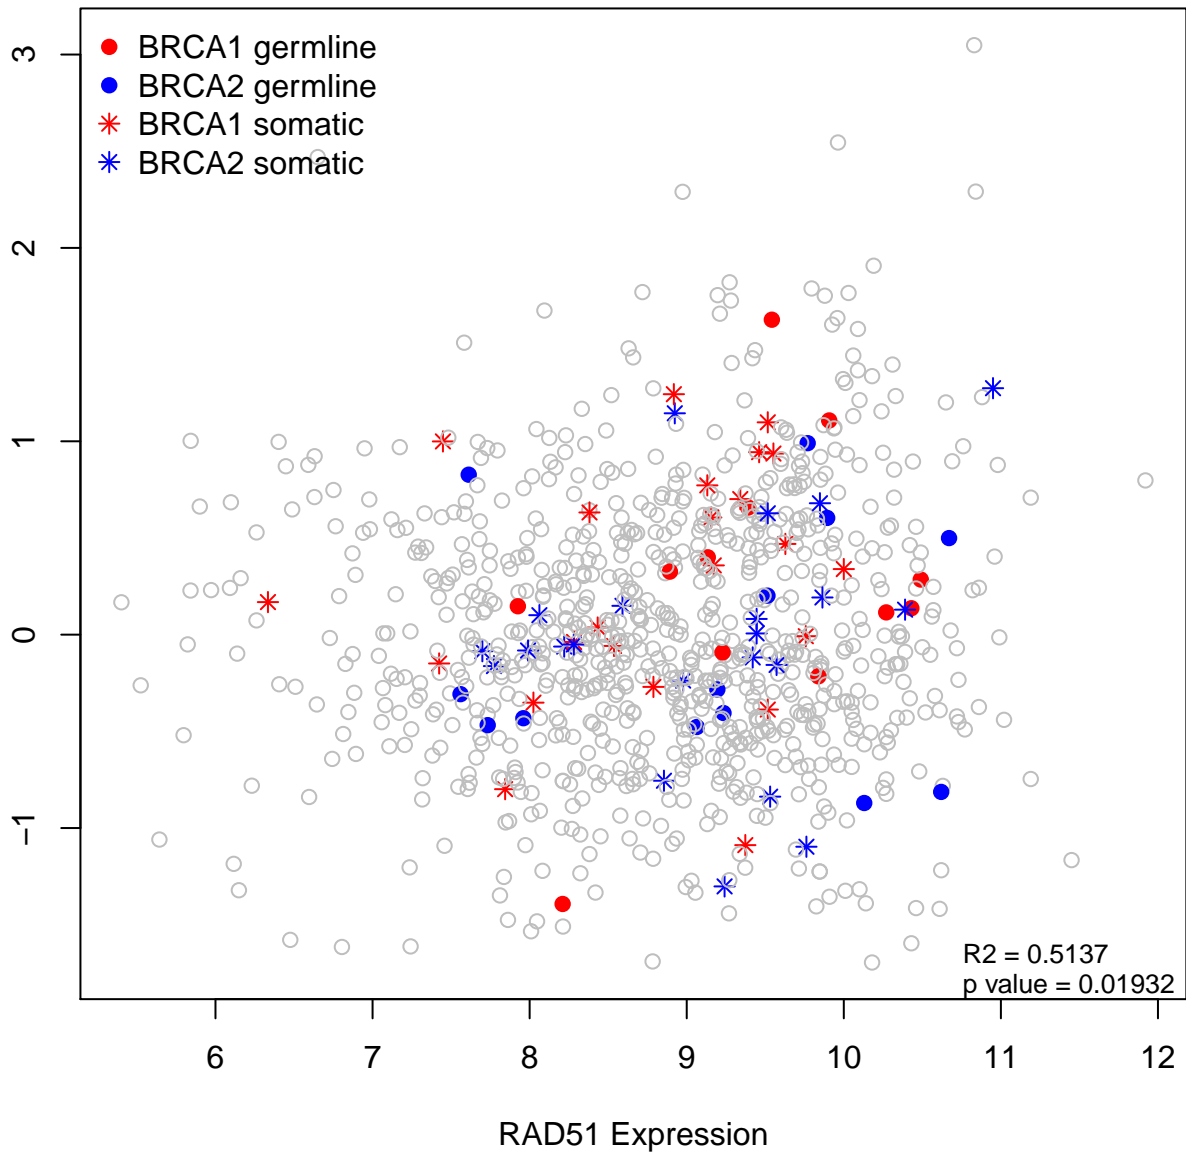

Karginova\_ABT888\_MDAMB436\_Up

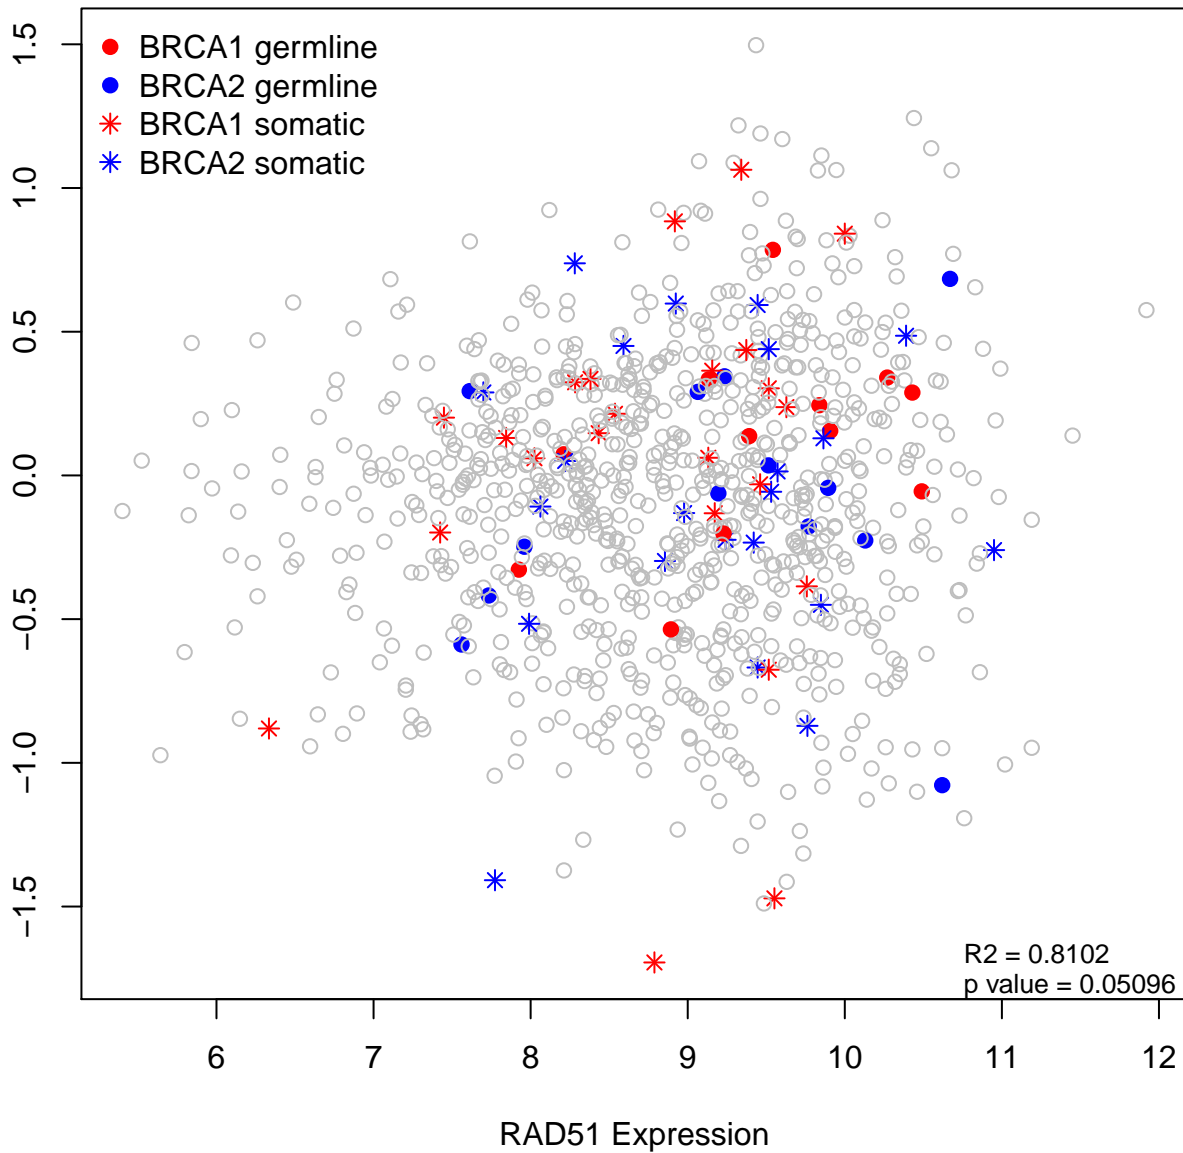

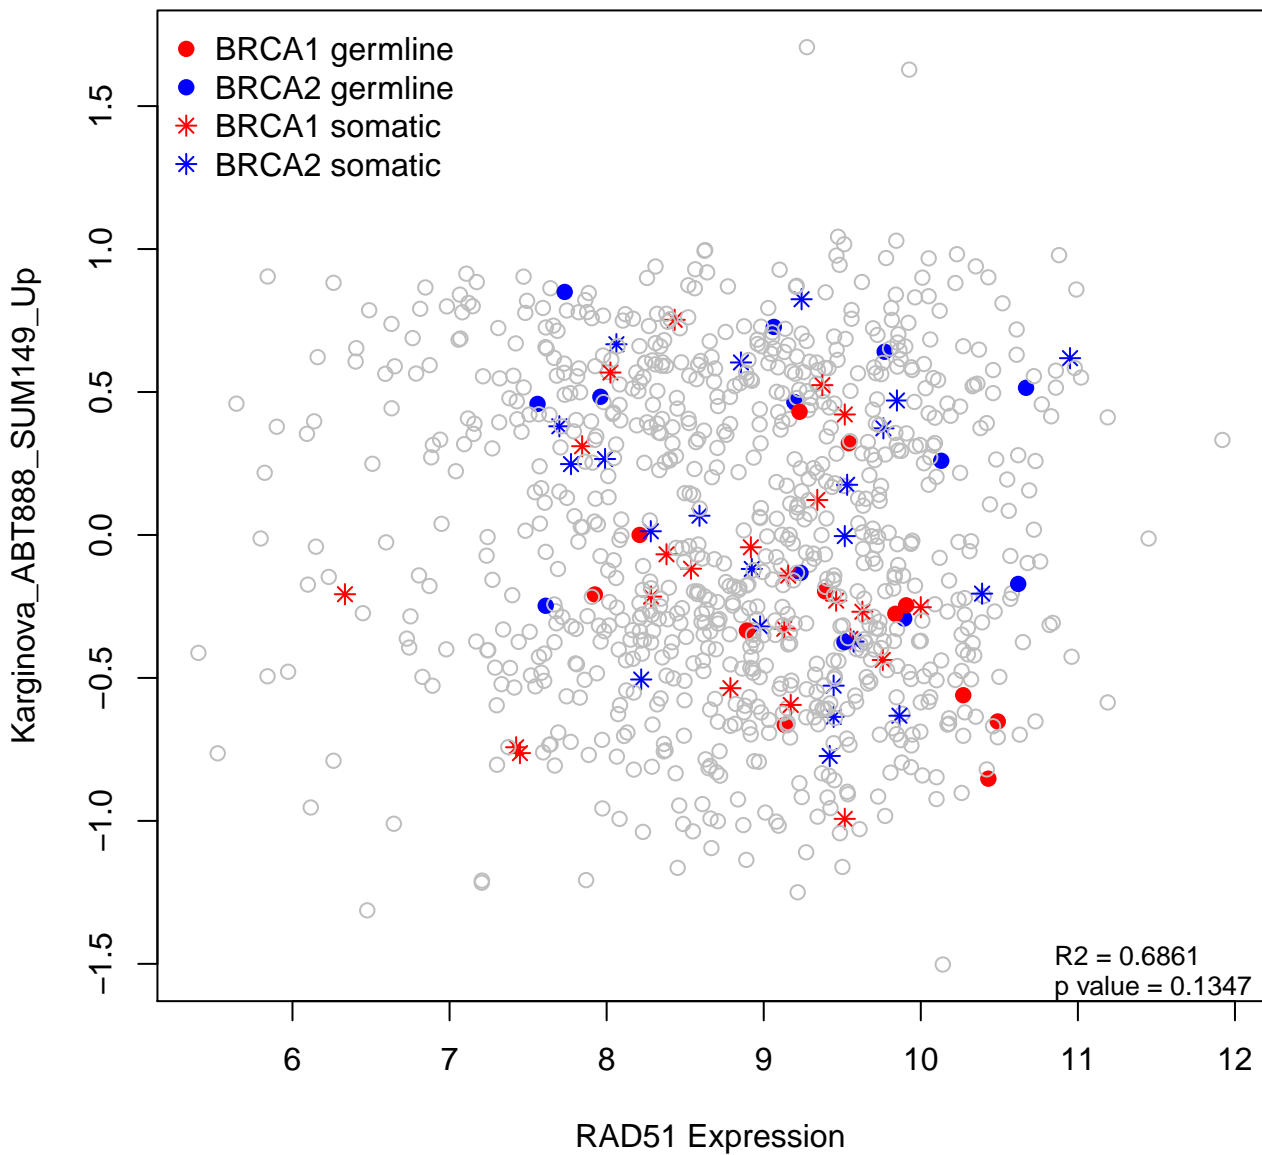

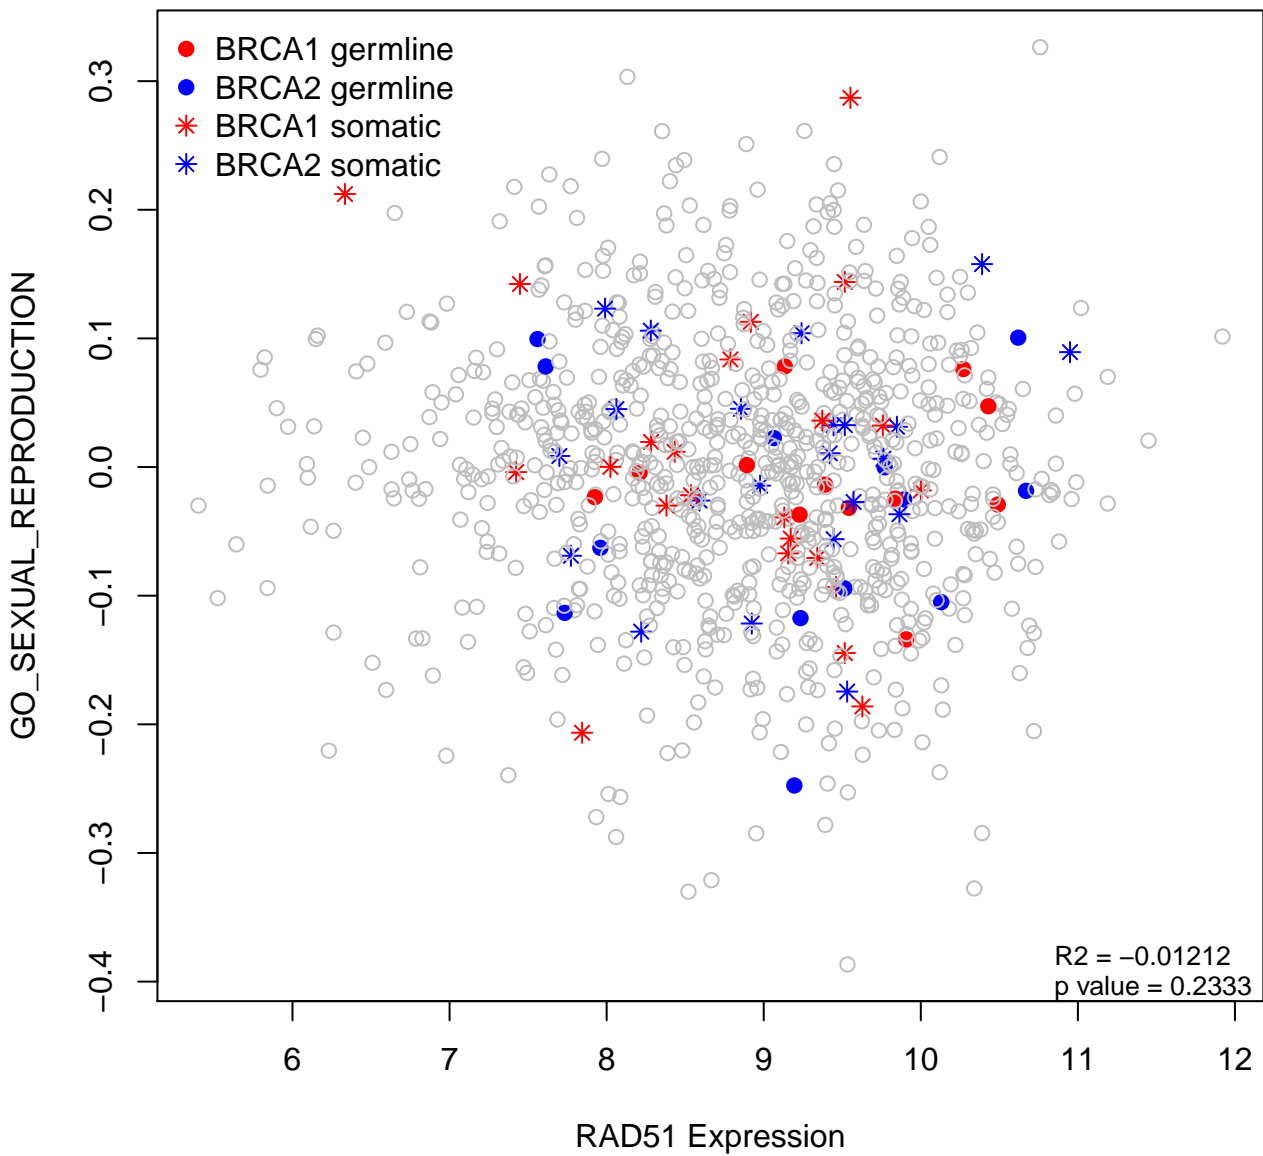

BASED\_ON\_SOMATIC\_RECOMBINATION\_OF\_IMMUNE\_RECEPTORS\_BUILT\_FROM\_IMM

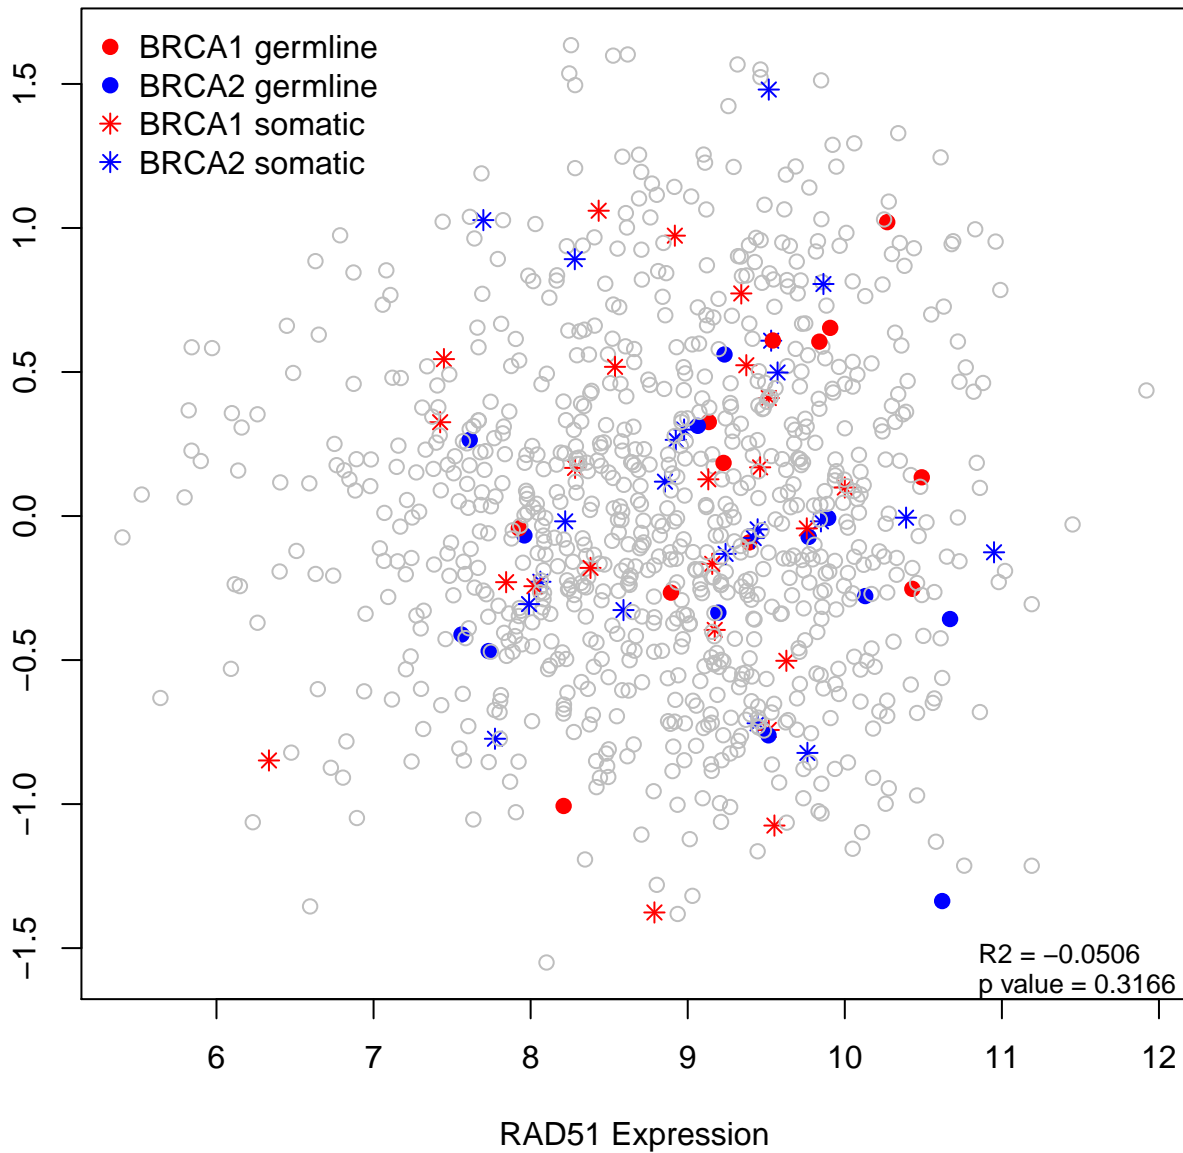

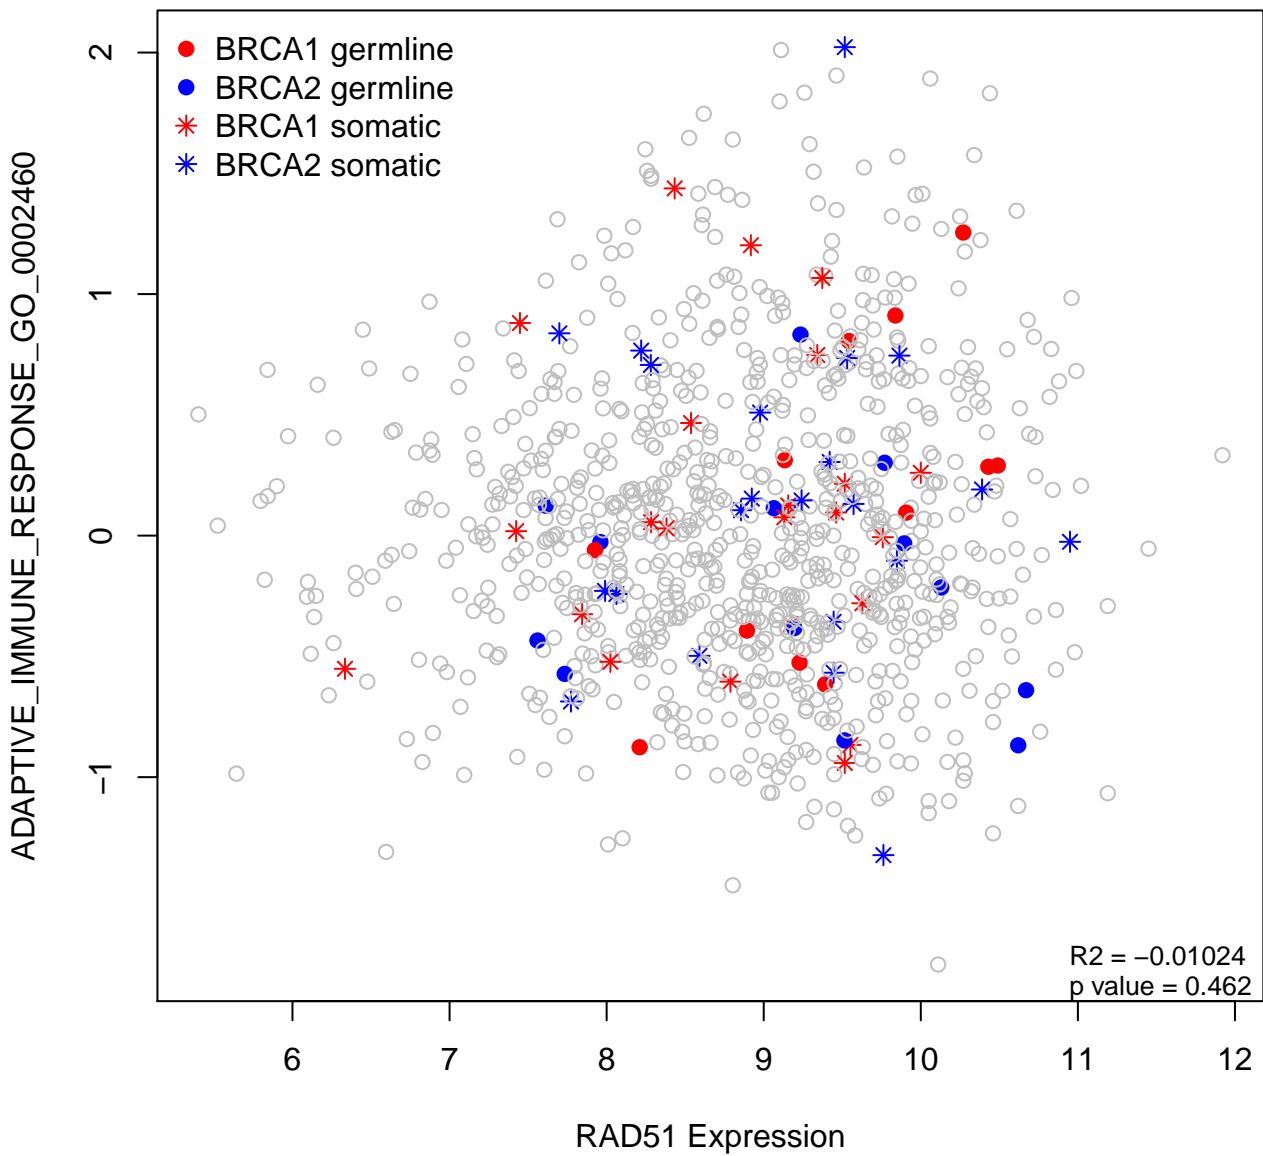

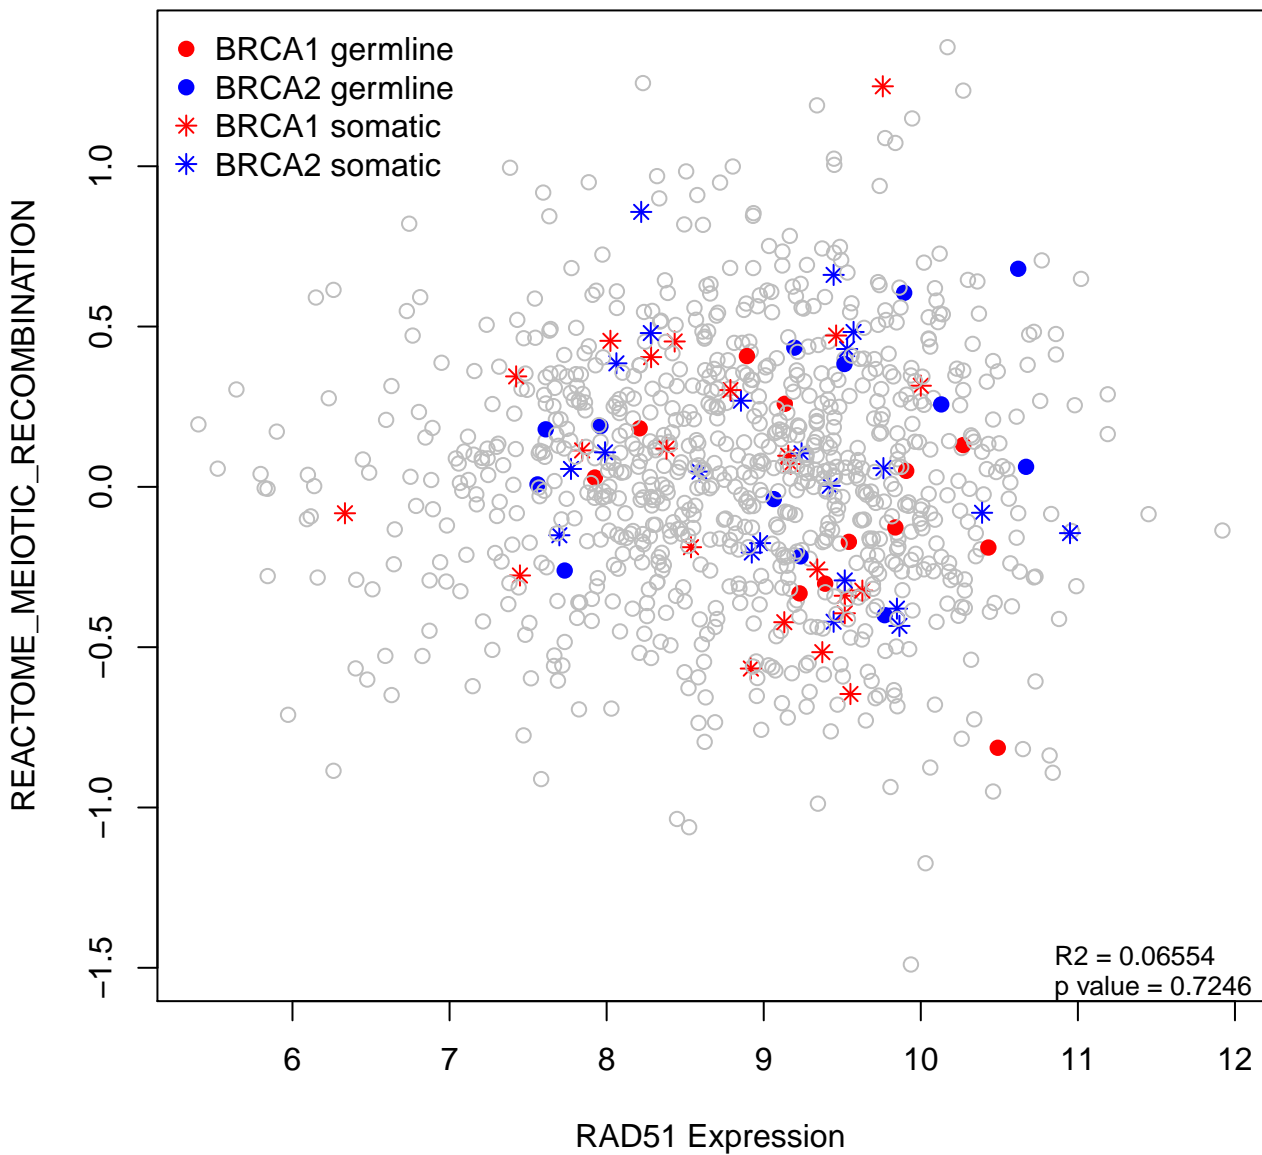



Karginova\_ABT888\_SUM149\_Down

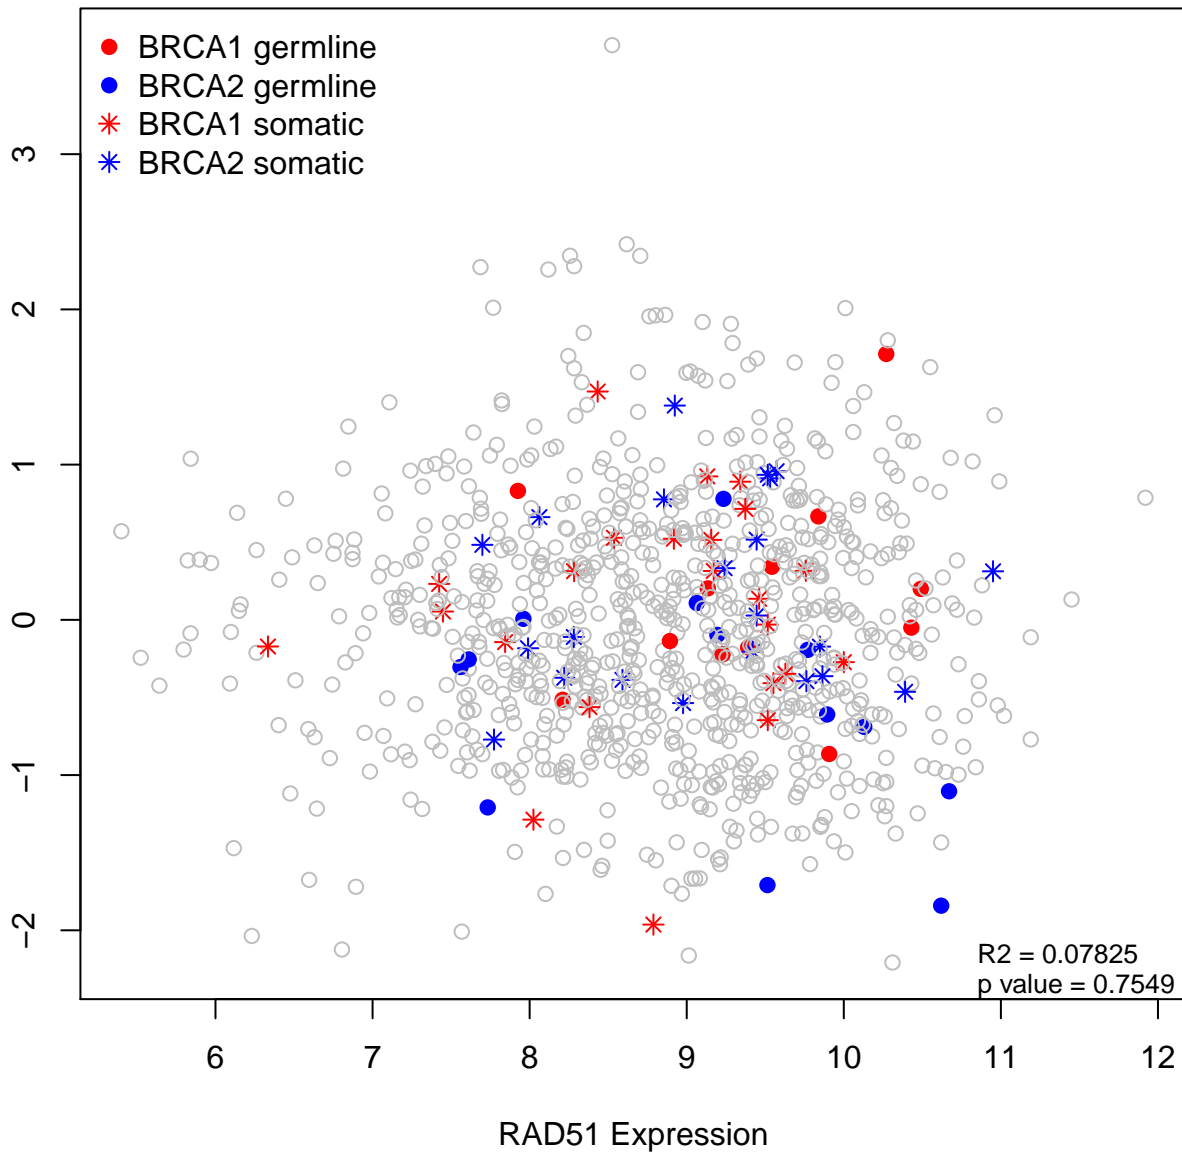

Supplement: vdz005_suppl_supplementary_figure_1.pdf [file vdz005_suppl_supplementary_figure_1.pdf]
